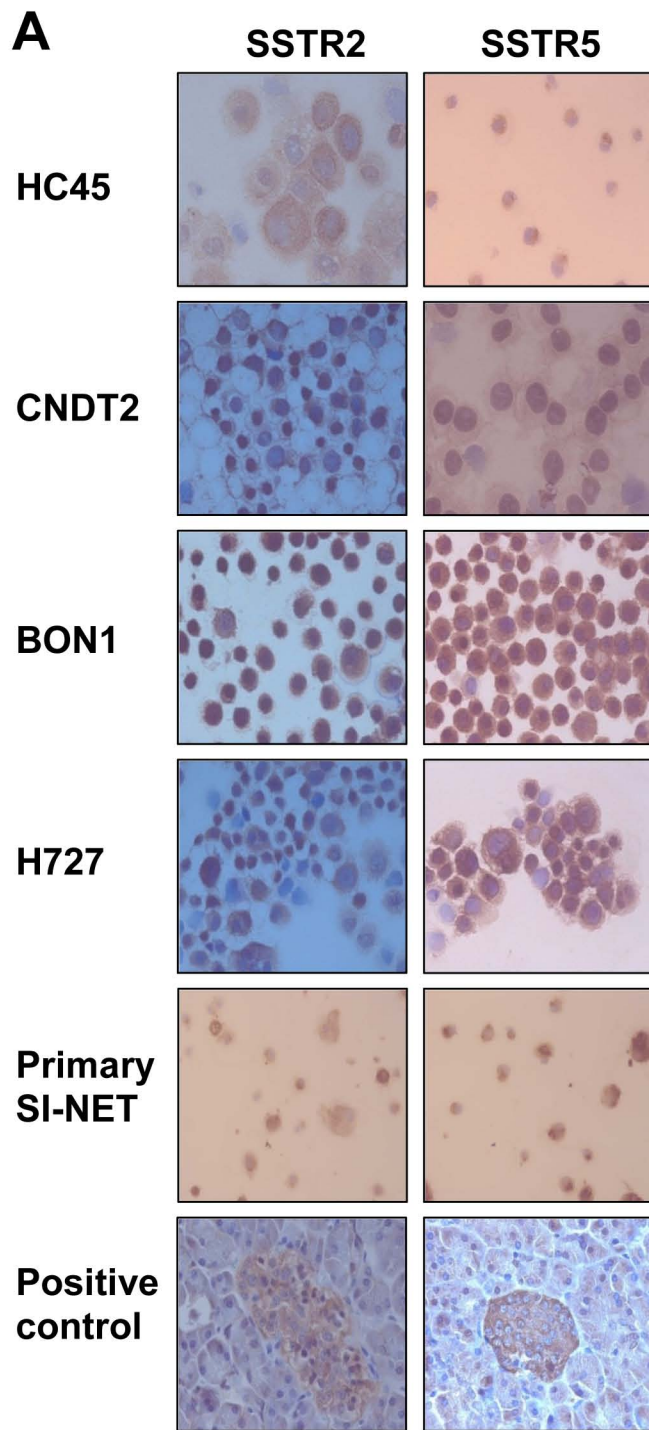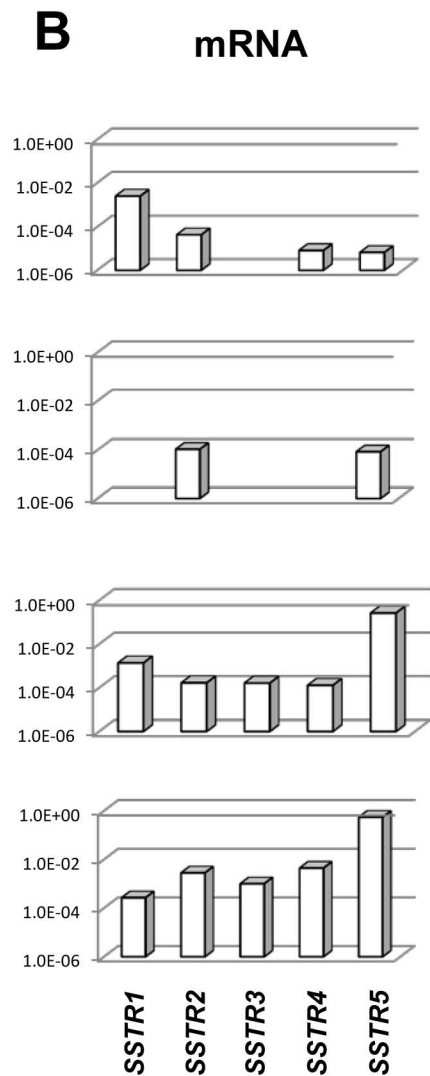

**Supplementary Figure S1. Expression of the SSTR2 and SSTR5 proteins and the SSTR1-5 genes. (A)** Photomicrographs showing immunocytochemistry analysis of NET cell lines and the primary SI-NET culture. Immunohistochemistry of normal pancreas shows expression in Langerhans islets as a positive control. Magnification: 160x in HC45 and primary SI-NET or 400x in the other cases. **(B)** Relative mRNA expression levels were determined by qRT-PCR and normalized to the endogenous control *ACTB*.

**HC45****H727**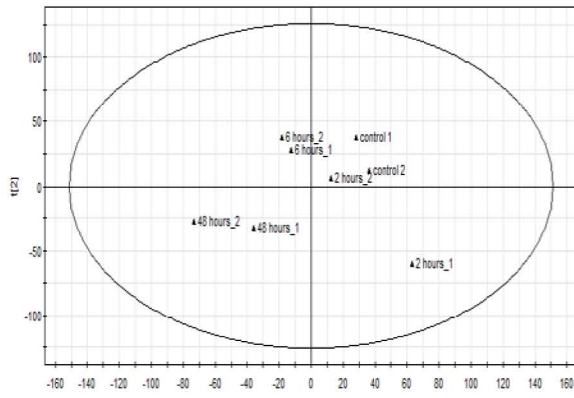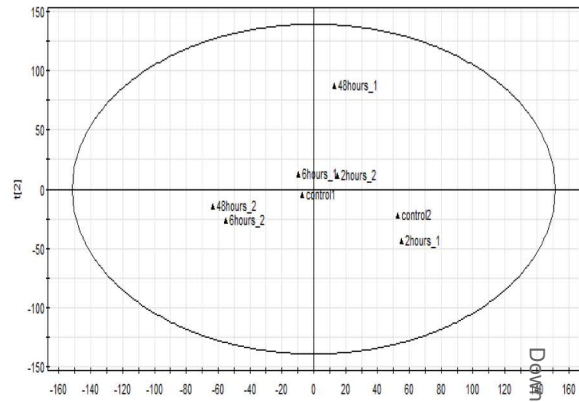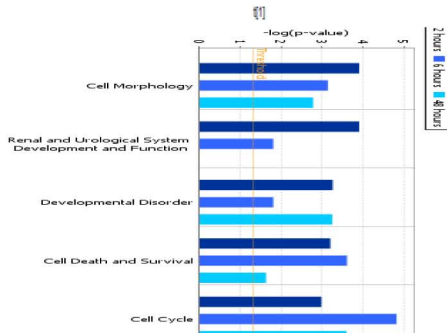**2 hours**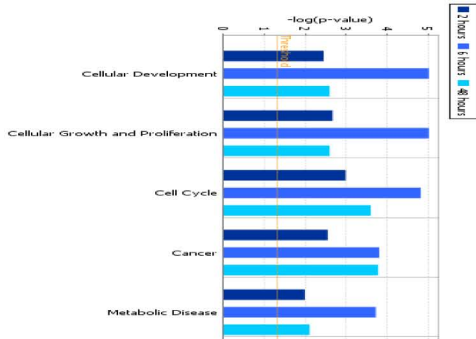**6 hours**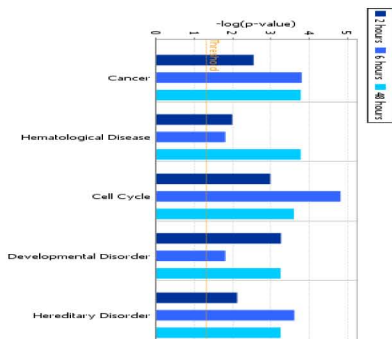**48 hours**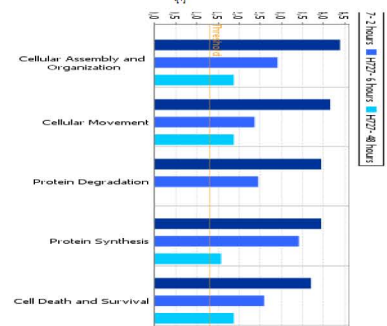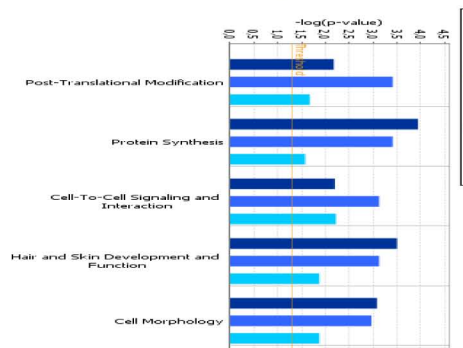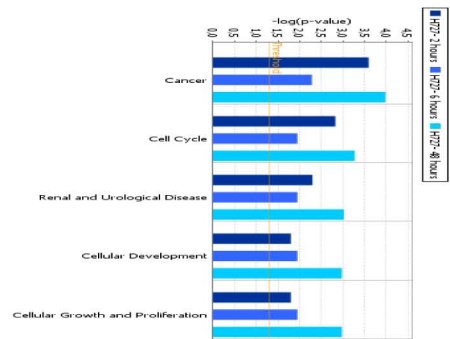

Downloaded from https://academic.oup.com/ehp/advance-article/doi/10.12918/2023.03616/2764900 by guest on 25 April 2024

**Supplementary Figure S2. Principal component analysis (PCA) and pathways identified by Ingenuity analyses after lanreotide treatment.** Top: PCA was performed for all proteins quantified in controls and after lanreotide treatment at 2, 6 and 48 hours for the HC45 and H727 cell lines. For each condition two replicates are shown. Below: The top five pathways are shown for altered proteins at 2, 6 and 48 hours lanreotide treatment of HC45 and H727 cells.

## A HC45

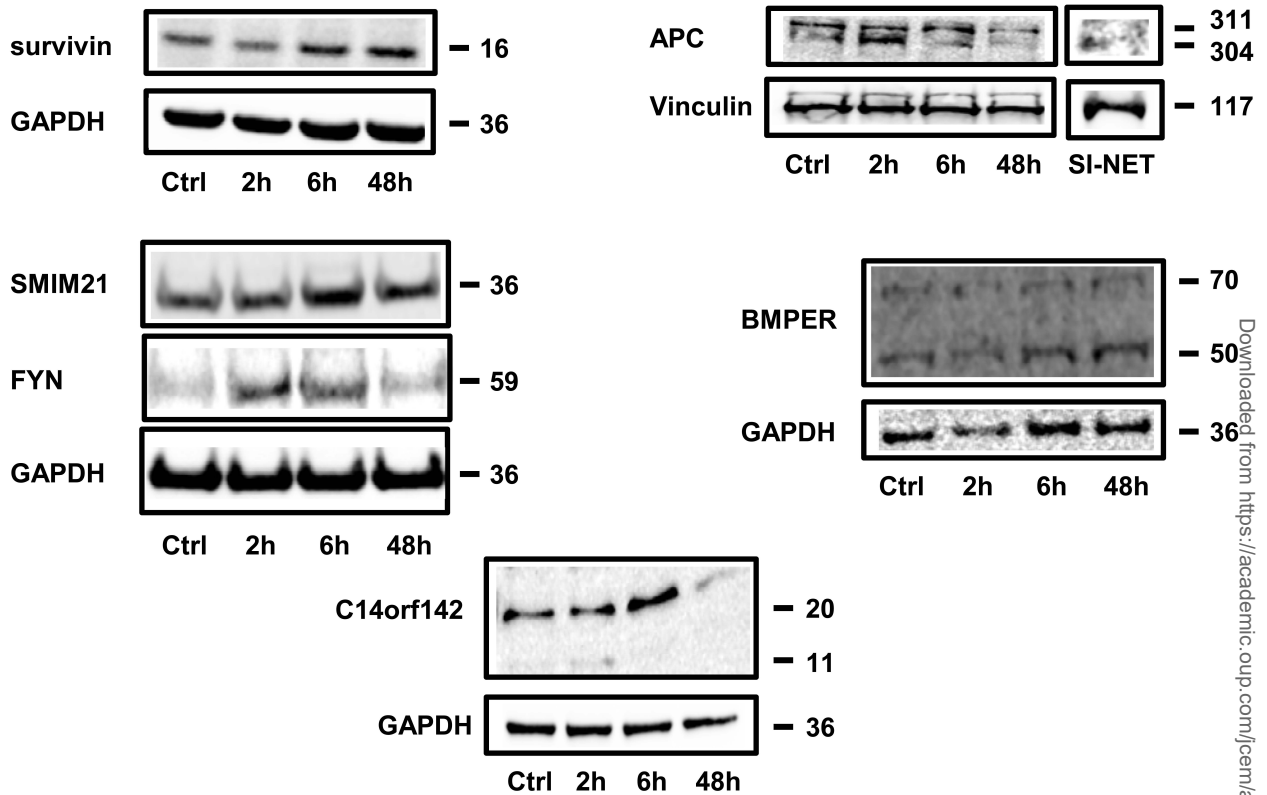

## B H727

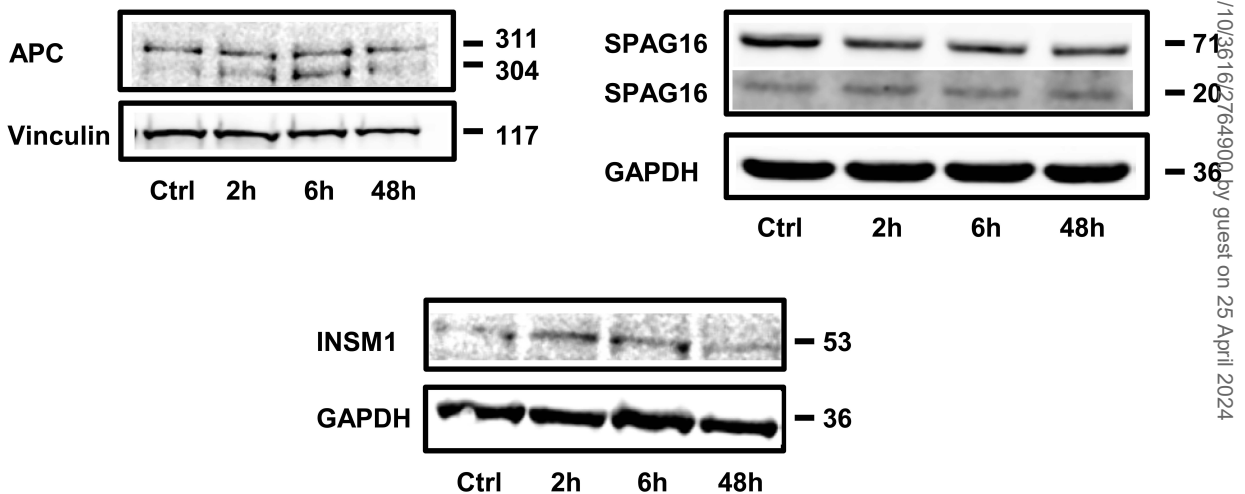

**Supplementary Figure S3. Western blot analysis of selected deregulated proteins identified by proteomics experiments.** Detection of APC, SMIM21, survivin, C14orf142 and BMPER in HC45 (A) and of APC, SPAG16 and INSM in H727 (B) cell lines. Protein sizes are given to the right in kDa. Results are shown for untreated control cells and after 2, 6, and 48 hours of 10 nM lanreotide treatment. Analyses of survivin in HC45 at 48 hours treatment with lanreotide at different concentrations are also shown in (A). The antibody EP701Y was used for detection of APC. GAPDH and Vinculin were used as loading controls.

**A**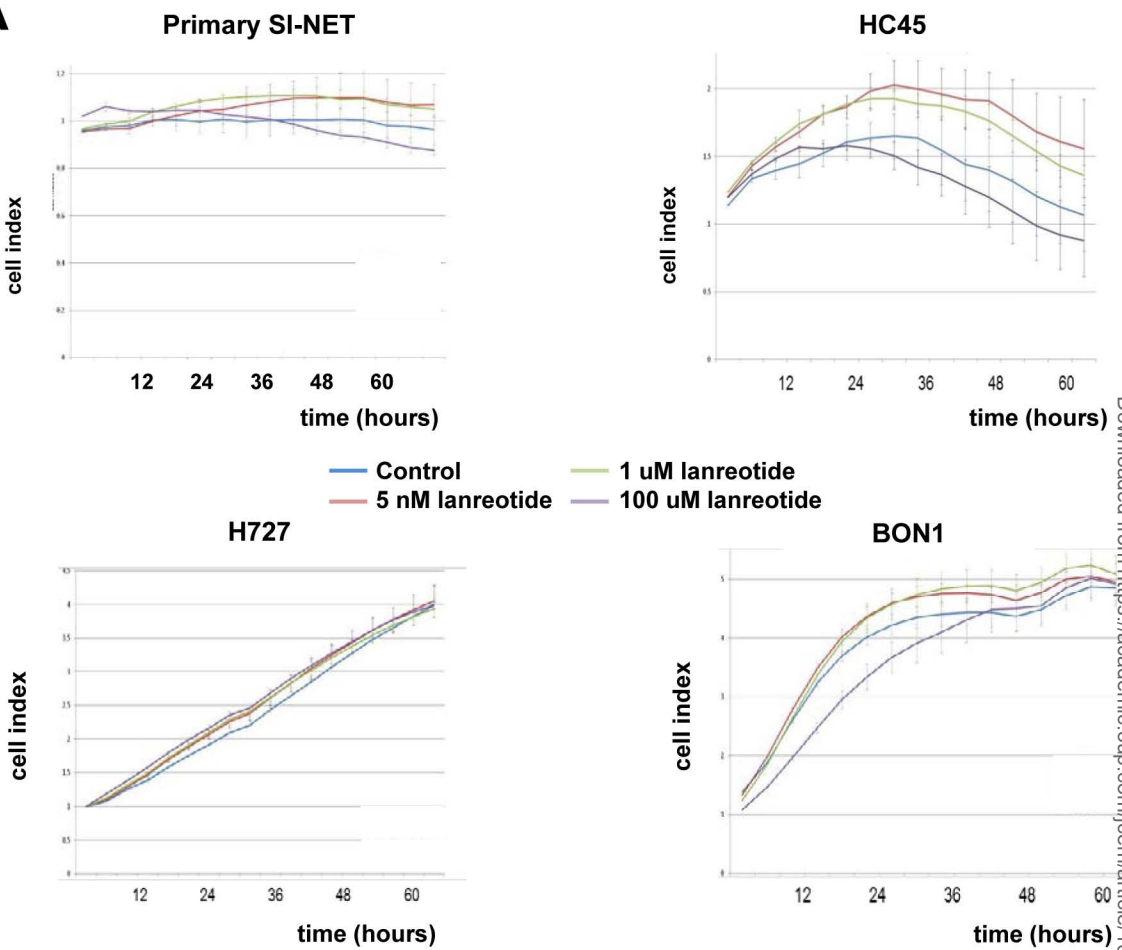

Downloaded from https://academic.oup.com/jcem/article/10/1/10/3616/2764990 by guest on 25 April 2024

**B**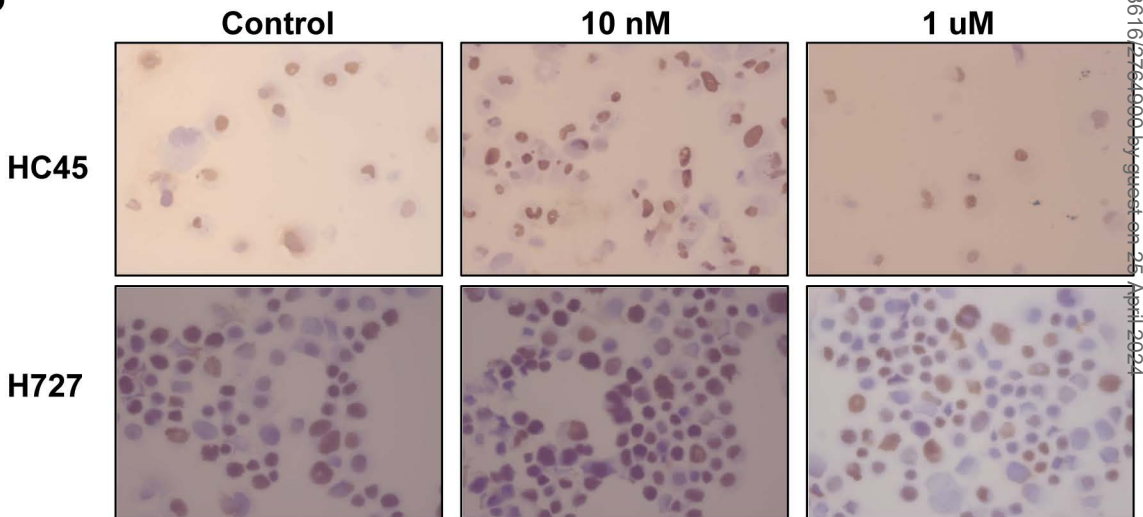

**Supplementary Figure S4. Analysis of proliferation and MIB-1 staining of cell lines after lanreotide treatment. (A)** Time resolution xCELLigence was used to assess possible effects on proliferation in lanreotide treated cells and untreated controls.

**(B)** MIB1 immunocytochemistry was performed for HC45 and H727 in control cells (without treatment) and after 9 days of treatment with lanreotide at different concentrations.

Magnification: 160× and 400× for HC45 or H727

**Supplementary Table S1. Summary of clinical characteristics for NET cases (n=112) included in the TMA.**

| <b>Parameter</b>                   | <b>observations</b> | <b>(%)</b> |
|------------------------------------|---------------------|------------|
| <b>Gender</b>                      |                     |            |
| female                             | 55                  | (49.1)     |
| male                               | 57                  | (50.9)     |
| <b>Age</b>                         |                     |            |
| median years                       | 55                  |            |
| range years                        | 12 - 91             |            |
| <b>Primary tumor site</b>          |                     |            |
| pancreas                           | 28                  | (25.0)     |
| small bowel                        | 28                  | (25.0)     |
| stomach                            | 1                   | (0.9)      |
| appendix                           | 43                  | (38.4)     |
| colon and rectum                   | 7                   | (6.3)      |
| unknown origin                     | 5                   | (4.5)      |
| <b>Functionality</b>               |                     |            |
| functional                         | 7                   | (6.3)      |
| non-functional                     | 53                  | (47.3)     |
| unknown                            | 52                  | (46.4)     |
| <b>Grade</b>                       |                     |            |
| Grade 1                            | 74                  | (66.1)     |
| Grade 2                            | 11                  | (9.8)      |
| Grade 3                            | 8                   | (7.1)      |
| unknown                            | 19                  | (17.0)     |
| <b>Stage</b>                       |                     |            |
| Stage I                            | 34                  | (30.4)     |
| Stage II                           | 17                  | (15.2)     |
| Stage III                          | 17                  | (15.2)     |
| Stage IV                           | 17                  | (15.2)     |
| unknown                            | 27                  | (24.1)     |
| <b>T classification</b>            |                     |            |
| T1                                 | 20                  | (17.9)     |
| T2                                 | 23                  | (20.5)     |
| T3                                 | 21                  | (18.8)     |
| T4                                 | 18                  | (16.1)     |
| unknown                            | 30                  | (26.8)     |
| <b>Proliferation index (Ki-67)</b> |                     |            |
| <2%                                | 67                  | (59.8)     |
| 2-20%                              | 13                  | (11.6)     |
| >20%                               | 7                   | (6.3)      |
| unknown                            | 25                  | (22.3)     |
| <b>Lymph node involvement</b>      |                     |            |

|                                  |      |        |
|----------------------------------|------|--------|
| present                          | 23   | (20.5) |
| not identified                   | 58   | (51.8) |
| unknown                          | 31   | (27.7) |
| <b><i>Distant metastases</i></b> |      |        |
| present                          | 17   | (15.2) |
| not identified                   | 95   | (84.8) |
| <b><i>Relapse</i></b>            |      |        |
| no                               | 84   | (75.0) |
| yes                              | 24   | (21.4) |
| unknown                          | 4    | (3.6)  |
| <b><i>Death</i></b>              |      |        |
| no                               | 87   | (77.7) |
| yes                              | 23   | (20.5) |
| unknown                          | 2    | (1.8)  |
| <b><i>Follow up</i></b>          |      |        |
| median years                     | 12   |        |
| range years                      | 1-34 |        |

---

**Supplementary Table S3. Differentially expressed proteins after lanreotide treatment.**

| Accession number                                      | Gene symbol                                                                                                                     | Expression vs. Control | P-value |
|-------------------------------------------------------|---------------------------------------------------------------------------------------------------------------------------------|------------------------|---------|
| <b>HC45 cells - 2 hours lanreotide (178 proteins)</b> |                                                                                                                                 |                        |         |
| Q9H147                                                | Deoxynucleotidyltransferase terminal-interacting protein 1 OS=Homo sapiens GN=DNTTIP1 PE=1 SV=2 - [TDIF1_HUMAN]                 | 0.574                  | 0.042   |
| P62714                                                | Serine/threonine-protein phosphatase 2A catalytic subunit beta isoform OS=Homo sapiens GN=PPP2CB PE=1 SV=1 - [PP2AB_HUMAN]      | 0.590                  | 0.002   |
| P01258                                                | Calcitonin OS=Homo sapiens GN=CALCA PE=1 SV=2 - [CALC_HUMAN]                                                                    | 0.687                  | 0.022   |
| O60573                                                | Eukaryotic translation initiation factor 4E type 2 OS=Homo sapiens GN=EIF4E2 PE=1 SV=1 - [IF4E2_HUMAN]                          | 0.764                  | 0.013   |
| Q9UPW8                                                | Protein unc-13 homolog A OS=Homo sapiens GN=UNC13A PE=2 SV=4 - [UN13A_HUMAN]                                                    | 0.785                  | 0.013   |
| O43852                                                | Calumenin OS=Homo sapiens GN=CALU PE=1 SV=2 - [CALU_HUMAN]                                                                      | 0.808                  | 0.002   |
| Q96HR8                                                | H/ACA ribonucleoprotein complex non-core subunit NAF1 OS=Homo sapiens GN=NAF1 PE=1 SV=2 - [NAF1_HUMAN]                          | 0.817                  | 0.029   |
| P10244                                                | Myb-related protein B OS=Homo sapiens GN=MYBL2 PE=1 SV=1 - [MYBB_HUMAN]                                                         | 0.819                  | 0.036   |
| P10114                                                | Ras-related protein Rap-2a OS=Homo sapiens GN=RAP2A PE=1 SV=1 - [RAP2A_HUMAN]                                                   | 0.824                  | 0.020   |
| Q13557-12                                             | Isoform Delta 12 of Calcium/calmodulin-dependent protein kinase type II subunit delta OS=Homo sapiens GN=CAMK2D - [KCC2D_HUMAN] | 0.826                  | 0.030   |
| P62633-3                                              | Isoform 3 of Cellular nucleic acid-binding protein OS=Homo sapiens GN=CNBP - [CNBP_HUMAN]                                       | 0.829                  | 0.039   |
| P0C0S5                                                | Histone H2A.Z OS=Homo sapiens GN=H2AFZ PE=1 SV=2 - [H2AZ_HUMAN]                                                                 | 0.832                  | 0.025   |
| Q15814                                                | Tubulin-specific chaperone C OS=Homo sapiens GN=TBCC PE=1 SV=2 - [TBCC_HUMAN]                                                   | 0.836                  | 0.027   |
| Q9UBL3-2                                              | Isoform 2 of Set1/Ash2 histone methyltransferase complex subunit ASH2 OS=Homo sapiens GN=ASH2L - [ASH2L_HUMAN]                  | 0.839                  | 0.033   |
| Q8N3Y1                                                | F-box/WD repeat-containing protein 8 OS=Homo sapiens GN=FBXW8 PE=1 SV=2 - [FBXW8_HUMAN]                                         | 0.845                  | 0.011   |
| P15408-3                                              | Isoform 3 of Fos-related antigen 2 OS=Homo sapiens GN=FOSL2 - [FOSL2_HUMAN]                                                     | 0.846                  | 0.008   |
| Q9GZY4                                                | Uncharacterized protein C7orf44 OS=Homo sapiens GN=C7orf44 PE=1 SV=1 - [CG044_HUMAN]                                            | 0.846                  | 0.023   |
| P15336                                                | Cyclic AMP-dependent transcription factor ATF-2 OS=Homo sapiens GN=ATF2 PE=1 SV=4 - [ATF2_HUMAN]                                | 0.849                  | 0.044   |
| O43181                                                | NADH dehydrogenase [ubiquinone] iron-sulfur protein 4, mitochondrial OS=Homo sapiens GN=NDUFS4 PE=1 SV=1 - [NDUS4_HUMAN]        | 0.852                  | 0.037   |
| O75695                                                | Protein XRP2 OS=Homo sapiens GN=RP2 PE=1 SV=4 - [XRP2_HUMAN]                                                                    | 0.853                  | 0.037   |
| Q96BP2                                                | Coiled-coil-helix-coiled-coil-helix domain-containing protein 1 OS=Homo sapiens GN=CHCHD1 PE=1 SV=1 - [CHCH1_HUMAN]             | 0.854                  | 0.040   |
| P13726                                                | Tissue factor OS=Homo sapiens GN=F3 PE=1 SV=1 - [TF_HUMAN]                                                                      | 0.859                  | 0.021   |
| Q6ZUT1                                                | Uncharacterized protein C11orf57 OS=Homo sapiens GN=C11orf57 PE=1 SV=2 - [CK057_HUMAN]                                          | 0.863                  | 0.017   |
| Q9P2K5-2                                              | Isoform 2 of Myelin expression factor 2 OS=Homo sapiens GN=MYEF2 - [MYEF2_HUMAN]                                                | 0.875                  | 0.028   |

|          |                                                                                                                         |       |       |
|----------|-------------------------------------------------------------------------------------------------------------------------|-------|-------|
| P35749   | Myosin-11 OS=Homo sapiens GN=MYH11 PE=1 SV=3 - [MYH11_HUMAN]                                                            | 0.877 | 0.039 |
| P05455   | Lupus La protein OS=Homo sapiens GN=SSB PE=1 SV=2 - [LA_HUMAN]                                                          | 0.877 | 0.026 |
| Q12933-4 | Isoform 4 of TNF receptor-associated factor 2 OS=Homo sapiens GN=TRAF2 - [TRAF2_HUMAN]                                  | 0.881 | 0.008 |
| Q6PI78   | Transmembrane protein 65 OS=Homo sapiens GN=TMEM65 PE=1 SV=2 - [TMM65_HUMAN]                                            | 0.882 | 0.019 |
| O75367-3 | Isoform 3 of Core histone macro-H2A.1 OS=Homo sapiens GN=H2AFY - [H2AY_HUMAN]                                           | 0.883 | 0.037 |
| Q9HBD1-6 | Isoform 6 of RING finger and CCCH-type zinc finger domain-containing protein 2 OS=Homo sapiens GN=RC3H2 - [RC3H2_HUMAN] | 0.883 | 0.009 |
| Q68EM7-2 | Isoform 2 of Rho GTPase-activating protein 17 OS=Homo sapiens GN=ARHGAP17 - [RHG17_HUMAN]                               | 0.884 | 0.024 |
| Q9Y673   | Dolichyl-phosphate beta-glucosyltransferase OS=Homo sapiens GN=ALG5 PE=1 SV=1 - [ALG5_HUMAN]                            | 0.890 | 0.044 |
| Q8N4V1   | Membrane magnesium transporter 1 OS=Homo sapiens GN=MMGT1 PE=1 SV=1 - [MMGT1_HUMAN]                                     | 0.890 | 0.017 |
| P01111   | GTPase NRas OS=Homo sapiens GN=NRAS PE=1 SV=1 - [RASN_HUMAN]                                                            | 0.892 | 0.019 |
| Q96GZ6-6 | Isoform 6 of Solute carrier family 41 member 3 OS=Homo sapiens GN=SLC41A3 - [S41A3_HUMAN]                               | 0.893 | 0.039 |
| Q86Y91-2 | Isoform 2 of Kinesin-like protein KIF18B OS=Homo sapiens GN=KIF18B - [KI18B_HUMAN]                                      | 0.895 | 0.035 |
| Q9BZK7   | F-box-like/WD repeat-containing protein TBL1XR1 OS=Homo sapiens GN=TBL1XR1 PE=1 SV=1 - [TBL1R_HUMAN]                    | 0.899 | 0.025 |
| O43719   | HIV Tat-specific factor 1 OS=Homo sapiens GN=HTATSF1 PE=1 SV=1 - [HTSF1_HUMAN]                                          | 0.899 | 0.016 |
| Q9H0L4   | Cleavage stimulation factor subunit 2 tau variant OS=Homo sapiens GN=CSTF2T PE=1 SV=1 - [CSTFT_HUMAN]                   | 0.900 | 0.001 |
| Q9Y2R0   | Coiled-coil domain-containing protein 56 OS=Homo sapiens GN=CCDC56 PE=1 SV=1 - [CCD56_HUMAN]                            | 0.902 | 0.013 |
| Q15019   | Septin-2 OS=Homo sapiens GN=SEPT2 PE=1 SV=1 - [SEPT2_HUMAN]                                                             | 0.903 | 0.041 |
| Q9H5Q4   | Dimethyladenosine transferase 2, mitochondrial OS=Homo sapiens GN=TFB2M PE=1 SV=1 - [TFB2M_HUMAN]                       | 0.903 | 0.016 |
| Q96KQ7-2 | Isoform 2 of Histone-lysine N-methyltransferase EHMT2 OS=Homo sapiens GN=EHMT2 - [EHMT2_HUMAN]                          | 0.903 | 0.042 |
| Q8NBN3-3 | Isoform 3 of Transmembrane protein 87A OS=Homo sapiens GN=TMEM87A - [TM87A_HUMAN]                                       | 0.904 | 0.044 |
| P26440   | Isovaleryl-CoA dehydrogenase, mitochondrial OS=Homo sapiens GN=IVD PE=1 SV=1 - [IVD_HUMAN]                              | 0.904 | 0.014 |
| Q9NVP1   | ATP-dependent RNA helicase DDX18 OS=Homo sapiens GN=DDX18 PE=1 SV=2 - [DDX18_HUMAN]                                     | 0.904 | 0.045 |
| Q9P0L0   | Vesicle-associated membrane protein-associated protein A OS=Homo sapiens GN=VAPA PE=1 SV=3 - [VAPA_HUMAN]               | 0.904 | 0.035 |
| P41227   | N-alpha-acetyltransferase 10 OS=Homo sapiens GN=NAA10 PE=1 SV=1 - [NAA10_HUMAN]                                         | 0.904 | 0.004 |
| P52895   | Aldo-keto reductase family 1 member C2 OS=Homo sapiens GN=AKR1C2 PE=1 SV=3 - [AK1C2_HUMAN]                              | 0.905 | 0.042 |
| Q9H2J4   | Phosducin-like protein 3 OS=Homo sapiens GN=PDCL3 PE=1 SV=1 - [PDCL3_HUMAN]                                             | 0.906 | 0.048 |
| P08195   | 4F2 cell-surface antigen heavy chain OS=Homo sapiens GN=SLC3A2 PE=1 SV=3 - [4F2_HUMAN]                                  | 0.906 | 0.029 |
| Q9H082   | Ras-related protein Rab-33B OS=Homo sapiens GN=RAB33B PE=1 SV=1 - [RB33B_HUMAN]                                         | 0.908 | 0.032 |
| Q3KQV9   | UDP-N-acetylhexosamine pyrophosphorylase-like protein 1 OS=Homo sapiens GN=UAP1L1 PE=2 SV=2 - [UAP1L_HUMAN]             | 0.910 | 0.027 |



|          |                                                                                                                                       |       |       |
|----------|---------------------------------------------------------------------------------------------------------------------------------------|-------|-------|
| Q9Y314   | Nitric oxide synthase-interacting protein OS=Homo sapiens GN=NOSIP PE=1 SV=1 - [NOSIP_HUMAN]                                          | 0.914 | 0.042 |
| P50402   | Emerin OS=Homo sapiens GN=EMD PE=1 SV=1 - [EMD_HUMAN]                                                                                 | 0.919 | 0.014 |
| P27824   | Calnexin OS=Homo sapiens GN=CANX PE=1 SV=2 - [CALX_HUMAN]                                                                             | 0.920 | 0.031 |
| P52565   | Rho GDP-dissociation inhibitor 1 OS=Homo sapiens GN=ARHGDI1 PE=1 SV=3 - [GDIR1_HUMAN]                                                 | 0.923 | 0.027 |
| Q5H9R7-3 | Isoform 3 of Serine/threonine-protein phosphatase 6 regulatory subunit 3 OS=Homo sapiens GN=PPP6R3 - [PP6R3_HUMAN]                    | 0.924 | 0.028 |
| P37235   | Hippocalcin-like protein 1 OS=Homo sapiens GN=HPCAL1 PE=1 SV=3 - [HPCL1_HUMAN]                                                        | 0.924 | 0.039 |
| Q99653   | Calcium-binding protein p22 OS=Homo sapiens GN=CHP PE=1 SV=3 - [CHP1_HUMAN]                                                           | 0.924 | 0.016 |
| O15270   | Serine palmitoyltransferase 2 OS=Homo sapiens GN=SPTLC2 PE=1 SV=1 - [SPTC2_HUMAN]                                                     | 0.925 | 0.043 |
| Q9NYP7   | Elongation of very long chain fatty acids protein 5 OS=Homo sapiens GN=ELOVL5 PE=1 SV=1 - [ELOV5_HUMAN]                               | 0.926 | 0.039 |
| Q14681   | BTB/POZ domain-containing protein KCTD2 OS=Homo sapiens GN=KCTD2 PE=1 SV=3 - [KCTD2_HUMAN]                                            | 0.928 | 0.022 |
| Q0ZGT2-2 | Isoform 2 of Nexilin OS=Homo sapiens GN=NEXN - [NEXN_HUMAN]                                                                           | 0.929 | 0.028 |
| O14776-2 | Isoform 2 of Transcription elongation regulator 1 OS=Homo sapiens GN=TCERG1 - [TCRG1_HUMAN]                                           | 0.930 | 0.044 |
| O14828   | Secretory carrier-associated membrane protein 3 OS=Homo sapiens GN=SCAMP3 PE=1 SV=3 - [SCAM3_HUMAN]                                   | 0.930 | 0.032 |
| Q8NEY8-6 | Isoform 6 of Periphilin-1 OS=Homo sapiens GN=PPHLN1 - [PPHLN_HUMAN]                                                                   | 0.931 | 0.044 |
| P35580   | Myosin-10 OS=Homo sapiens GN=MYH10 PE=1 SV=3 - [MYH10_HUMAN]                                                                          | 0.932 | 0.010 |
| P68431   | Histone H3.1 OS=Homo sapiens GN=HIST1H3A PE=1 SV=2 - [H31_HUMAN]                                                                      | 0.934 | 0.012 |
| Q14669   | Probable E3 ubiquitin-protein ligase TRIP12 OS=Homo sapiens GN=TRIP12 PE=1 SV=1 - [TRIPC_HUMAN]                                       | 0.934 | 0.005 |
| P13995   | Bifunctional methylenetetrahydrofolate dehydrogenase/cyclohydrolase, mitochondrial OS=Homo sapiens GN=MTHFD2 PE=1 SV=2 - [MTDC_HUMAN] | 0.935 | 0.035 |
| Q9UGP8   | Translocation protein SEC63 homolog OS=Homo sapiens GN=SEC63 PE=1 SV=2 - [SEC63_HUMAN]                                                | 0.940 | 0.029 |
| Q93009   | Ubiquitin carboxyl-terminal hydrolase 7 OS=Homo sapiens GN=USP7 PE=1 SV=2 - [UBP7_HUMAN]                                              | 0.949 | 0.018 |
| P06396-2 | Isoform 2 of Gelsolin OS=Homo sapiens GN=GSN - [GELS_HUMAN]                                                                           | 0.949 | 0.038 |
| Q9H4A4   | Aminopeptidase B OS=Homo sapiens GN=RNPEP PE=1 SV=2 - [AMPB_HUMAN]                                                                    | 0.954 | 0.045 |
| P43034   | Platelet-activating factor acetylhydrolase IB subunit alpha OS=Homo sapiens GN=PFAH1B1 PE=1 SV=2 - [LIS1_HUMAN]                       | 0.954 | 0.020 |
| Q96KB5   | Lymphokine-activated killer T-cell-originated protein kinase OS=Homo sapiens GN=PBK PE=1 SV=3 - [TOPK_HUMAN]                          | 0.954 | 0.029 |
| Q13310-2 | Isoform 2 of Polyadenylate-binding protein 4 OS=Homo sapiens GN=PABPC4 - [PABP4_HUMAN]                                                | 0.957 | 0.008 |
| P55884   | Eukaryotic translation initiation factor 3 subunit B OS=Homo sapiens GN=EIF3B PE=1 SV=3 - [EIF3B_HUMAN]                               | 0.957 | 0.044 |
| Q15435   | Protein phosphatase 1 regulatory subunit 7 OS=Homo sapiens GN=PPP1R7 PE=1 SV=1 - [PP1R7_HUMAN]                                        | 0.957 | 0.049 |
| O14745   | Na(+)/H(+) exchange regulatory cofactor NHE-RF1 OS=Homo sapiens GN=SLC9A3R1 PE=1 SV=4 - [NHRF1_HUMAN]                                 | 0.960 | 0.020 |
| P06733   | Alpha-enolase OS=Homo sapiens GN=ENO1 PE=1 SV=2 - [ENOA_HUMAN]                                                                        | 0.963 | 0.005 |

|          |                                                                                                                                       |       |       |
|----------|---------------------------------------------------------------------------------------------------------------------------------------|-------|-------|
| O15371   | Eukaryotic translation initiation factor 3 subunit D OS=Homo sapiens GN=EIF3D PE=1 SV=1 - [EIF3D_HUMAN]                               | 0.964 | 0.038 |
| P31751   | RAC-beta serine/threonine-protein kinase OS=Homo sapiens GN=AKT2 PE=1 SV=2 - [AKT2_HUMAN]                                             | 0.965 | 0.044 |
| P01137   | Transforming growth factor beta-1 OS=Homo sapiens GN=TGFB1 PE=1 SV=2 - [TGFB1_HUMAN]                                                  | 0.967 | 0.037 |
| Q9Y2L9-2 | Isoform 2 of Leucine-rich repeat and calponin homology domain-containing protein 1 OS=Homo sapiens GN=LRCH1 - [LRCH1_HUMAN]           | 0.968 | 0.048 |
| Q96EU7   | C1GALT1-specific chaperone 1 OS=Homo sapiens GN=C1GALT1C1 PE=1 SV=1 - [C1GLC_HUMAN]                                                   | 0.970 | 0.007 |
| P14866   | Heterogeneous nuclear ribonucleoprotein L OS=Homo sapiens GN=HNRNPL PE=1 SV=2 - [HNRPL_HUMAN]                                         | 0.972 | 0.023 |
| Q00839-2 | Isoform Short of Heterogeneous nuclear ribonucleoprotein U OS=Homo sapiens GN=HNRNPU - [HNRPU_HUMAN]                                  | 0.972 | 0.023 |
| Q13459-2 | Isoform Short of Myosin-IXb OS=Homo sapiens GN=MYO9B - [MYO9B_HUMAN]                                                                  | 0.973 | 0.022 |
| Q92609   | TBC1 domain family member 5 OS=Homo sapiens GN=TBC1D5 PE=1 SV=1 - [TBCD5_HUMAN]                                                       | 0.974 | 0.019 |
| O43707   | Alpha-actinin-4 OS=Homo sapiens GN=ACTN4 PE=1 SV=2 - [ACTN4_HUMAN]                                                                    | 0.976 | 0.023 |
| Q9NZN5-2 | Isoform 2 of Rho guanine nucleotide exchange factor 12 OS=Homo sapiens GN=ARHGEF12 - [ARHGC_HUMAN]                                    | 0.977 | 0.035 |
| O00541-2 | Isoform 2 of Pescadillo homolog OS=Homo sapiens GN=PES1 - [PESC_HUMAN]                                                                | 0.979 | 0.015 |
| P22314   | Ubiquitin-like modifier-activating enzyme 1 OS=Homo sapiens GN=UBA1 PE=1 SV=3 - [UBA1_HUMAN]                                          | 0.987 | 0.045 |
| Q99575   | Ribonucleases P/MRP protein subunit POP1 OS=Homo sapiens GN=POP1 PE=1 SV=2 - [POP1_HUMAN]                                             | 1.017 | 0.022 |
| P04632   | Calpain small subunit 1 OS=Homo sapiens GN=CAPNS1 PE=1 SV=1 - [CPNS1_HUMAN]                                                           | 1.019 | 0.033 |
| P42345   | Serine/threonine-protein kinase mTOR OS=Homo sapiens GN=MTOR PE=1 SV=1 - [MTOR_HUMAN]                                                 | 1.025 | 0.006 |
| P17987   | T-complex protein 1 subunit alpha OS=Homo sapiens GN=TCP1 PE=1 SV=1 - [TCPA_HUMAN]                                                    | 1.026 | 0.023 |
| P30046   | D-dopachrome decarboxylase OS=Homo sapiens GN=DDT PE=1 SV=3 - [DOPD_HUMAN]                                                            | 1.029 | 0.045 |
| P30153   | Serine/threonine-protein phosphatase 2A 65 kDa regulatory subunit A alpha isoform OS=Homo sapiens GN=PPP2R1A PE=1 SV=4 - [2AAA_HUMAN] | 1.029 | 0.025 |
| Q8N556   | Actin filament-associated protein 1 OS=Homo sapiens GN=AFAP1 PE=1 SV=2 - [AFAP1_HUMAN]                                                | 1.031 | 0.010 |
| Q6UX07-2 | Isoform 2 of Dehydrogenase/reductase SDR family member 13 OS=Homo sapiens GN=DHRS13 - [DHR13_HUMAN]                                   | 1.032 | 0.021 |
| Q9Y5P4-2 | Isoform 2 of Collagen type IV alpha-3-binding protein OS=Homo sapiens GN=COL4A3BP - [C43BP_HUMAN]                                     | 1.035 | 0.038 |
| Q8N3R9   | MAGUK p55 subfamily member 5 OS=Homo sapiens GN=MPP5 PE=1 SV=3 - [MPP5_HUMAN]                                                         | 1.037 | 0.007 |
| Q9NSE4   | Isoleucine--tRNA ligase, mitochondrial OS=Homo sapiens GN=IARS2 PE=1 SV=2 - [SYIM_HUMAN]                                              | 1.038 | 0.012 |
| Q03518   | Antigen peptide transporter 1 OS=Homo sapiens GN=TAP1 PE=1 SV=2 - [TAP1_HUMAN]                                                        | 1.046 | 0.028 |
| P45974-2 | Isoform Short of Ubiquitin carboxyl-terminal hydrolase 5 OS=Homo sapiens GN=USP5 - [UBP5_HUMAN]                                       | 1.048 | 0.036 |
| Q00613-2 | Isoform Short of Heat shock factor protein 1 OS=Homo sapiens GN=HSF1 - [HSF1_HUMAN]                                                   | 1.050 | 0.023 |
| Q08AD1-2 | Isoform 2 of Calmodulin-regulated spectrin-associated protein 2 OS=Homo sapiens GN=CAMSAP2 - [CAMP2_HUMAN]                            | 1.051 | 0.039 |
| Q08431-3 | Isoform 3 of Lactadherin OS=Homo sapiens GN=MFGE8 - [MFGM_HUMAN]                                                                      | 1.054 | 0.046 |

|          |                                                                                                                                    |       |       |
|----------|------------------------------------------------------------------------------------------------------------------------------------|-------|-------|
| Q96CN9   | GRIP and coiled-coil domain-containing protein 1 OS=Homo sapiens GN=GCC1 PE=1 SV=1 - [GCC1_HUMAN]                                  | 1.056 | 0.015 |
| P62995-3 | Isoform 3 of Transformer-2 protein homolog beta OS=Homo sapiens GN=TRA2B - [TRA2B_HUMAN]                                           | 1.057 | 0.040 |
| P08910   | Abhydrolase domain-containing protein 2 OS=Homo sapiens GN=ABHD2 PE=2 SV=1 - [ABHD2_HUMAN]                                         | 1.060 | 0.022 |
| Q9NTZ6   | RNA-binding protein 12 OS=Homo sapiens GN=RBM12 PE=1 SV=1 - [RBM12_HUMAN]                                                          | 1.060 | 0.015 |
| Q13426-2 | Isoform 2 of DNA repair protein XRCC4 OS=Homo sapiens GN=XRCC4 - [XRCC4_HUMAN]                                                     | 1.062 | 0.005 |
| P27144   | Adenylate kinase isoenzyme 4, mitochondrial OS=Homo sapiens GN=AK4 PE=1 SV=1 - [KAD4_HUMAN]                                        | 1.063 | 0.007 |
| Q15185   | Prostaglandin E synthase 3 OS=Homo sapiens GN=PTGES3 PE=1 SV=1 - [TEBP_HUMAN]                                                      | 1.063 | 0.048 |
| P56962   | Syntaxin-17 OS=Homo sapiens GN=STX17 PE=1 SV=2 - [STX17_HUMAN]                                                                     | 1.066 | 0.036 |
| Q9BVM4   | Gamma-glutamylaminocyclotransferase OS=Homo sapiens GN=A2LD1 PE=1 SV=2 - [A2LD1_HUMAN]                                             | 1.067 | 0.028 |
| P62136   | Serine/threonine-protein phosphatase PP1-alpha catalytic subunit OS=Homo sapiens GN=PPP1CA PE=1 SV=1 - [PP1A_HUMAN]                | 1.067 | 0.044 |
| Q9NW82   | WD repeat-containing protein 70 OS=Homo sapiens GN=WDR70 PE=1 SV=1 - [WDR70_HUMAN]                                                 | 1.072 | 0.014 |
| Q96CW6   | Probable RNA polymerase II nuclear localization protein SLC7A6 OS=Homo sapiens GN=SLC7A6OS PE=1 SV=2 - [S7A6O_HUMAN]               | 1.074 | 0.006 |
| P51812   | Ribosomal protein S6 kinase alpha-3 OS=Homo sapiens GN=RPS6KA3 PE=1 SV=1 - [KS6A3_HUMAN]                                           | 1.074 | 0.012 |
| Q96QZ7-3 | Isoform 3 of Membrane-associated guanylate kinase, WW and PDZ domain-containing protein 1 OS=Homo sapiens GN=MAGI1 - [MAGI1_HUMAN] | 1.076 | 0.035 |
| Q969F9-2 | Isoform 2 of Hermansky-Pudlak syndrome 3 protein OS=Homo sapiens GN=HPS3 - [HPS3_HUMAN]                                            | 1.080 | 0.022 |
| O96033   | Molybdopterine synthase sulfur carrier subunit OS=Homo sapiens GN=MOCS2 PE=1 SV=1 - [MOC2A_HUMAN]                                  | 1.081 | 0.039 |
| Q8N653   | Leucine-zipper-like transcriptional regulator 1 OS=Homo sapiens GN=LZTR1 PE=2 SV=2 - [LZTR1_HUMAN]                                 | 1.082 | 0.005 |
| O15111   | Inhibitor of nuclear factor kappa-B kinase subunit alpha OS=Homo sapiens GN=CHUK PE=1 SV=2 - [IKKA_HUMAN]                          | 1.086 | 0.020 |
| Q13098-5 | Isoform 4 of COP9 signalosome complex subunit 1 OS=Homo sapiens GN=GPS1 - [CSN1_HUMAN]                                             | 1.089 | 0.020 |
| Q8TDY2-2 | Isoform 2 of RB1-inducible coiled-coil protein 1 OS=Homo sapiens GN=RB1CC1 - [RBCC1_HUMAN]                                         | 1.094 | 0.010 |
| P48553   | Trafficking protein particle complex subunit 10 OS=Homo sapiens GN=TRAPPC10 PE=1 SV=2 - [TPC10_HUMAN]                              | 1.095 | 0.034 |
| P47914   | 60S ribosomal protein L29 OS=Homo sapiens GN=RPL29 PE=1 SV=2 - [RL29_HUMAN]                                                        | 1.096 | 0.031 |
| P14678-2 | Isoform SM-B of Small nuclear ribonucleoprotein-associated proteins B and B' OS=Homo sapiens GN=SNRNP - [RSMB_HUMAN]               | 1.099 | 0.022 |
| Q96ED9-2 | Isoform 2 of Protein Hook homolog 2 OS=Homo sapiens GN=HOOK2 - [HOOK2_HUMAN]                                                       | 1.104 | 0.033 |
| P61803   | Dolichyl-diphosphooligosaccharide--protein glycosyltransferase subunit DAD1 OS=Homo sapiens GN=DAD1 PE=1 SV=3 - [DAD1_HUMAN]       | 1.110 | 0.040 |
| P10646-2 | Isoform Beta of Tissue factor pathway inhibitor OS=Homo sapiens GN=TFPI - [TFPI1_HUMAN]                                            | 1.111 | 0.033 |
| A2RUC4-2 | Isoform 2 of tRNA tryptophan-synthesizing protein 5 OS=Homo sapiens GN=TYW5 - [TYW5_HUMAN]                                         | 1.113 | 0.005 |
| Q9NWB6   | Arginine and glutamate-rich protein 1 OS=Homo sapiens GN=ARGLU1 PE=1 SV=1 - [ARGL1_HUMAN]                                          | 1.116 | 0.041 |
| Q9NRH1   | Uncharacterized protein C7orf36 OS=Homo sapiens GN=C7orf36 PE=1 SV=1 - [CG036_HUMAN]                                               | 1.117 | 0.027 |

|          |                                                                                                                                  |       |       |
|----------|----------------------------------------------------------------------------------------------------------------------------------|-------|-------|
| O75879   | Glutamyl-tRNA(Gln) amidotransferase subunit B, mitochondrial OS=Homo sapiens GN=PET112 PE=1 SV=1 - [GATB_HUMAN]                  | 1.119 | 0.027 |
| Q86WQ0   | Nuclear receptor 2C2-associated protein OS=Homo sapiens GN=NR2C2AP PE=1 SV=1 - [NR2CA_HUMAN]                                     | 1.122 | 0.005 |
| Q96LT7-2 | Isoform 2 of Uncharacterized protein C9orf72 OS=Homo sapiens GN=C9orf72 - [CI072_HUMAN]                                          | 1.123 | 0.020 |
| Q5TEU4-2 | Isoform 2 of Probable methyltransferase C20orf7, mitochondrial OS=Homo sapiens GN=C20orf7 - [CT007_HUMAN]                        | 1.124 | 0.017 |
| Q9UI26   | Importin-11 OS=Homo sapiens GN=IPO11 PE=1 SV=1 - [IPO11_HUMAN]                                                                   | 1.129 | 0.004 |
| P19256-2 | Isoform 2 of Lymphocyte function-associated antigen 3 OS=Homo sapiens GN=CD58 - [LFA3_HUMAN]                                     | 1.129 | 0.048 |
| Q9Y672   | Dolichyl pyrophosphate Man9GlcNAc2 alpha-1,3-glucosyltransferase OS=Homo sapiens GN=ALG6 PE=1 SV=1 - [ALG6_HUMAN]                | 1.131 | 0.014 |
| Q7Z7G8-2 | Isoform 2 of Vacuolar protein sorting-associated protein 13B OS=Homo sapiens GN=VPS13B - [VP13B_HUMAN]                           | 1.140 | 0.032 |
| Q9Y2D4   | Exocyst complex component 6B OS=Homo sapiens GN=EXOC6B PE=1 SV=3 - [EXC6B_HUMAN]                                                 | 1.144 | 0.037 |
| Q9Y6B6   | GTP-binding protein SAR1b OS=Homo sapiens GN=SAR1B PE=1 SV=1 - [SAR1B_HUMAN]                                                     | 1.144 | 0.030 |
| Q9P0U4   | CpG-binding protein OS=Homo sapiens GN=CXXC1 PE=1 SV=2 - [CXXC1_HUMAN]                                                           | 1.146 | 0.039 |
| Q9UGU0-2 | Isoform 2 of Transcription factor 20 OS=Homo sapiens GN=TCF20 - [TCF20_HUMAN]                                                    | 1.151 | 0.011 |
| Q96EU6-2 | Isoform 2 of Ribosomal RNA processing protein 36 homolog OS=Homo sapiens GN=RRP36 - [RRP36_HUMAN]                                | 1.152 | 0.033 |
| Q99470   | Stromal cell-derived factor 2 OS=Homo sapiens GN=SDF2 PE=1 SV=2 - [SDF2_HUMAN]                                                   | 1.152 | 0.025 |
| P49419-2 | Isoform 2 of Alpha-aminoadipic semialdehyde dehydrogenase OS=Homo sapiens GN=ALDH7A1 - [AL7A1_HUMAN]                             | 1.161 | 0.016 |
| Q8NB15-2 | Isoform 2 of Zinc finger protein 511 OS=Homo sapiens GN=ZNF511 - [ZN511_HUMAN]                                                   | 1.165 | 0.039 |
| Q9P1Z2-4 | Isoform 4 of Calcium-binding and coiled-coil domain-containing protein 1 OS=Homo sapiens GN=CALCOCO1 - [CACO1_HUMAN]             | 1.166 | 0.025 |
| Q6BDS2   | UHRF1-binding protein 1 OS=Homo sapiens GN=UHRF1BP1 PE=1 SV=1 - [URFB1_HUMAN]                                                    | 1.166 | 0.044 |
| Q9UKV5   | E3 ubiquitin-protein ligase AMFR OS=Homo sapiens GN=AMFR PE=1 SV=2 - [AMFR2_HUMAN]                                               | 1.177 | 0.021 |
| Q13261-8 | Isoform 7 of Interleukin-15 receptor subunit alpha OS=Homo sapiens GN=IL15RA - [I15RA_HUMAN]                                     | 1.179 | 0.003 |
| O00522-2 | Isoform 2 of Krev interaction trapped protein 1 OS=Homo sapiens GN=KRIT1 - [KRIT1_HUMAN]                                         | 1.187 | 0.045 |
| Q8N7R7-3 | Isoform 3 of Cyclin-Y-like protein 1 OS=Homo sapiens GN=CCNYL1 - [CCYL1_HUMAN]                                                   | 1.192 | 0.033 |
| Q96P48-2 | Isoform 2 of Arf-GAP with Rho-GAP domain, ANK repeat and PH domain-containing protein 1 OS=Homo sapiens GN=ARAP1 - [ARAP1_HUMAN] | 1.193 | 0.037 |
| Q15058   | Kinesin-like protein KIF14 OS=Homo sapiens GN=KIF14 PE=1 SV=1 - [KIF14_HUMAN]                                                    | 1.196 | 0.027 |
| Q9NYB0   | Telomeric repeat-binding factor 2-interacting protein 1 OS=Homo sapiens GN=TERF2IP PE=1 SV=1 - [TE2IP_HUMAN]                     | 1.204 | 0.016 |
| Q15637-6 | Isoform 6 of Splicing factor 1 OS=Homo sapiens GN=SF1 - [SF01_HUMAN]                                                             | 1.210 | 0.027 |
| Q9HCP0-2 | Isoform 1S of Casein kinase I isoform gamma-1 OS=Homo sapiens GN=CSNK1G1 - [KC1G1_HUMAN]                                         | 1.218 | 0.045 |
| Q8N387   | Mucin-15 OS=Homo sapiens GN=MUC15 PE=2 SV=2 - [MUC15_HUMAN]                                                                      | 1.226 | 0.011 |
| O75907   | Diacylglycerol O-acyltransferase 1 OS=Homo sapiens GN=DGAT1 PE=1 SV=2 - [DGAT1_HUMAN]                                            | 1.248 | 0.049 |

|          |                                                                                                      |       |       |
|----------|------------------------------------------------------------------------------------------------------|-------|-------|
| Q9UKX7-2 | Isoform 2 of Nuclear pore complex protein Nup50 OS=Homo sapiens GN=NUP50 - [NUP50_HUMAN]             | 1.255 | 0.049 |
| Q14653   | Interferon regulatory factor 3 OS=Homo sapiens GN=IRF3 PE=1 SV=1 - [IRF3_HUMAN]                      | 1.258 | 0.022 |
| Q969R8   | Integrin-alpha FG-GAP repeat-containing protein 2 OS=Homo sapiens GN=ITFG2 PE=2 SV=1 - [ITFG2_HUMAN] | 1.263 | 0.038 |
| P13051-2 | Isoform 1 of Uracil-DNA glycosylase OS=Homo sapiens GN=UNG - [UNG_HUMAN]                             | 1.284 | 0.046 |
| Q96JP5-2 | Isoform 2 of E3 ubiquitin-protein ligase ZFP91 OS=Homo sapiens GN=ZFP91 - [ZFP91_HUMAN]              | 1.297 | 0.050 |
| Q9P2W1   | Homologous-pairing protein 2 homolog OS=Homo sapiens GN=PSMC3IP PE=1 SV=1 - [HOP2_HUMAN]             | 1.309 | 0.029 |
| P25054-2 | Isoform Short of Adenomatous polyposis coli protein OS=Homo sapiens GN=APC - [APC_HUMAN]             | 1.365 | 0.029 |
| O15145   | Actin-related protein 2/3 complex subunit 3 OS=Homo sapiens GN=ARPC3 PE=1 SV=3 - [ARPC3_HUMAN]       | 1.471 | 0.013 |
| Q8N8U9   | BMP-binding endothelial regulator protein OS=Homo sapiens GN=BMPER PE=1 SV=3 - [BMPER_HUMAN]         | 1.527 | 0.020 |

**HC45 cells - 6 hours lanreotide (268 proteins)**

|          |                                                                                                             |       |       |
|----------|-------------------------------------------------------------------------------------------------------------|-------|-------|
| P13645   | Keratin, type I cytoskeletal 10 OS=Homo sapiens GN=KRT10 PE=1 SV=6 - [K1C10_HUMAN]                          | 0.594 | 0.035 |
| Q15051-3 | Isoform 3 of IQ calmodulin-binding motif-containing protein 1 OS=Homo sapiens GN=IQCB1 - [IQCB1_HUMAN]      | 0.610 | 0.019 |
| P13647   | Keratin, type II cytoskeletal 5 OS=Homo sapiens GN=KRT5 PE=1 SV=3 - [K2C5_HUMAN]                            | 0.629 | 0.007 |
| Q9BXV9   | Uncharacterized protein C14orf142 OS=Homo sapiens GN=C14orf142 PE=2 SV=2 - [CN142_HUMAN]                    | 0.668 | 0.013 |
| Q4ZIN3-2 | Isoform 2 of Membralin OS=Homo sapiens GN=C19orf6 - [MBRL_HUMAN]                                            | 0.679 | 0.027 |
| O96020-2 | Isoform Short of G1/S-specific cyclin-E2 OS=Homo sapiens GN=CCNE2 - [CCNE2_HUMAN]                           | 0.734 | 0.004 |
| O75607   | Nucleoplasmin-3 OS=Homo sapiens GN=NPM3 PE=1 SV=3 - [NPM3_HUMAN]                                            | 0.738 | 0.014 |
| P51795-2 | Isoform 2 of H(+)/Cl(-) exchange transporter 5 OS=Homo sapiens GN=CLCN5 - [CLCN5_HUMAN]                     | 0.739 | 0.050 |
| O95199-2 | Isoform 2 of RCC1 and BTB domain-containing protein 2 OS=Homo sapiens GN=RCBT2 - [RCBT2_HUMAN]              | 0.751 | 0.042 |
| P02675   | Fibrinogen beta chain OS=Homo sapiens GN=FGB PE=1 SV=2 - [FIBB_HUMAN]                                       | 0.751 | 0.029 |
| Q9NRG4   | N-lysine methyltransferase SMYD2 OS=Homo sapiens GN=SMYD2 PE=1 SV=2 - [SMYD2_HUMAN]                         | 0.758 | 0.023 |
| Q96AX1   | Vacuolar protein sorting-associated protein 33A OS=Homo sapiens GN=VPS33A PE=1 SV=1 - [VP33A_HUMAN]         | 0.763 | 0.027 |
| Q9ULH0-3 | Isoform 3 of Kinase D-interacting substrate of 220 kDa OS=Homo sapiens GN=KIDINS220 - [KDIS_HUMAN]          | 0.773 | 0.043 |
| Q12982   | BCL2/adenovirus E1B 19 kDa protein-interacting protein 2 OS=Homo sapiens GN=BNIP2 PE=1 SV=1 - [BNIP2_HUMAN] | 0.776 | 0.009 |
| Q9NQT8   | Kinesin-like protein KIF13B OS=Homo sapiens GN=KIF13B PE=1 SV=1 - [K113B_HUMAN]                             | 0.777 | 0.042 |
| O95243-3 | Isoform 3 of Methyl-CpG-binding domain protein 4 OS=Homo sapiens GN=MBD4 - [MBD4_HUMAN]                     | 0.781 | 0.048 |
| P38936   | Cyclin-dependent kinase inhibitor 1 OS=Homo sapiens GN=CDKN1A PE=1 SV=3 - [CDN1A_HUMAN]                     | 0.792 | 0.026 |
| Q8N6R0-3 | Isoform 3 of Methyltransferase-like protein 13 OS=Homo sapiens GN=METTL13 - [MTL13_HUMAN]                   | 0.793 | 0.035 |

|          |                                                                                                                   |       |       |
|----------|-------------------------------------------------------------------------------------------------------------------|-------|-------|
| Q16678   | Cytochrome P450 1B1 OS=Homo sapiens GN=CYP1B1 PE=1 SV=2 - [CP1B1_HUMAN]                                           | 0.794 | 0.047 |
| P16860   | Natriuretic peptides B OS=Homo sapiens GN=NPPB PE=1 SV=1 - [ANFB_HUMAN]                                           | 0.801 | 0.010 |
| Q9C035-5 | Isoform Epsilon of Tripartite motif-containing protein 5 OS=Homo sapiens GN=TRIM5 - [TRIM5_HUMAN]                 | 0.803 | 0.006 |
| Q9UK76   | Hematological and neurological expressed 1 protein OS=Homo sapiens GN=HN1 PE=1 SV=3 - [HN1_HUMAN]                 | 0.805 | 0.046 |
| P10909-3 | Isoform 3 of Clusterin OS=Homo sapiens GN=CLU - [CLUS_HUMAN]                                                      | 0.809 | 0.033 |
| Q12805-2 | Isoform 2 of EGF-containing fibulin-like extracellular matrix protein 1 OS=Homo sapiens GN=EFEMP1 - [FBLN3_HUMAN] | 0.813 | 0.042 |
| Q9NPD8   | Ubiquitin-conjugating enzyme E2 T OS=Homo sapiens GN=UBE2T PE=1 SV=1 - [UBE2T_HUMAN]                              | 0.817 | 0.038 |
| Q7Z5L2-2 | Isoform 2 of Growth inhibition and differentiation-related protein 88 OS=Homo sapiens GN=GIDRP88 - [GIDRP_HUMAN]  | 0.819 | 0.002 |
| Q14168-2 | Isoform 2 of MAGUK p55 subfamily member 2 OS=Homo sapiens GN=MPP2 - [MPP2_HUMAN]                                  | 0.832 | 0.010 |
| O60678-2 | Isoform 2 of Protein arginine N-methyltransferase 3 OS=Homo sapiens GN=PRMT3 - [ANM3_HUMAN]                       | 0.833 | 0.031 |
| P27701   | CD82 antigen OS=Homo sapiens GN=CD82 PE=1 SV=1 - [CD82_HUMAN]                                                     | 0.837 | 0.027 |
| Q99988   | Growth/differentiation factor 15 OS=Homo sapiens GN=GDF15 PE=1 SV=3 - [GDF15_HUMAN]                               | 0.837 | 0.017 |
| Q02447-4 | Isoform 4 of Transcription factor Sp3 OS=Homo sapiens GN=SP3 - [SP3_HUMAN]                                        | 0.839 | 0.019 |
| O43633   | Charged multivesicular body protein 2a OS=Homo sapiens GN=CHMP2A PE=1 SV=1 - [CHM2A_HUMAN]                        | 0.847 | 0.010 |
| Q96EU7   | C1GALT1-specific chaperone 1 OS=Homo sapiens GN=C1GALT1C1 PE=1 SV=1 - [C1GLC_HUMAN]                               | 0.850 | 0.042 |
| Q8WX19   | Transcriptional repressor p66-beta OS=Homo sapiens GN=GATAD2B PE=1 SV=1 - [P66B_HUMAN]                            | 0.852 | 0.048 |
| Q8NC51-2 | Isoform 2 of Plasminogen activator inhibitor 1 RNA-binding protein OS=Homo sapiens GN=SERBP1 - [PAIRB_HUMAN]      | 0.854 | 0.034 |
| O94953   | Lysine-specific demethylase 4B OS=Homo sapiens GN=KDM4B PE=1 SV=4 - [KDM4B_HUMAN]                                 | 0.857 | 0.016 |
| Q9NRW3   | Probable DNA dC->dU-editing enzyme APOBEC-3C OS=Homo sapiens GN=APOBEC3C PE=1 SV=2 - [ABC3C_HUMAN]                | 0.860 | 0.024 |
| P22694-8 | Isoform 8 of cAMP-dependent protein kinase catalytic subunit beta OS=Homo sapiens GN=PRKACB - [KAPCB_HUMAN]       | 0.861 | 0.042 |
| Q13685   | Angio-associated migratory cell protein OS=Homo sapiens GN=AAMP PE=1 SV=2 - [AAMP_HUMAN]                          | 0.863 | 0.010 |
| Q14696   | LDLR chaperone MESD OS=Homo sapiens GN=MESDC2 PE=1 SV=2 - [MESD_HUMAN]                                            | 0.864 | 0.047 |
| Q9Y546   | Leucine-rich repeat-containing protein 42 OS=Homo sapiens GN=LRRC42 PE=1 SV=1 - [LRC42_HUMAN]                     | 0.866 | 0.041 |
| Q16831   | Uridine phosphorylase 1 OS=Homo sapiens GN=UPP1 PE=1 SV=1 - [UPP1_HUMAN]                                          | 0.866 | 0.029 |
| P42677   | 40S ribosomal protein S27 OS=Homo sapiens GN=RPS27 PE=1 SV=3 - [RS27_HUMAN]                                       | 0.867 | 0.022 |
| P56589   | Peroxisomal biogenesis factor 3 OS=Homo sapiens GN=PEX3 PE=1 SV=1 - [PEX3_HUMAN]                                  | 0.868 | 0.021 |
| Q96KQ7-2 | Isoform 2 of Histone-lysine N-methyltransferase EHMT2 OS=Homo sapiens GN=EHMT2 - [EHMT2_HUMAN]                    | 0.869 | 0.038 |
| Q9NQX7-2 | Isoform 2 of Integral membrane protein 2C OS=Homo sapiens GN=ITM2C - [ITM2C_HUMAN]                                | 0.870 | 0.048 |
| Q8N4A0   | Polypeptide N-acetylgalactosaminyltransferase 4 OS=Homo sapiens GN=GALNT4 PE=1 SV=2 - [GALT4_HUMAN]               | 0.878 | 0.001 |

|          |                                                                                                                  |       |       |
|----------|------------------------------------------------------------------------------------------------------------------|-------|-------|
| P50402   | Emerin OS=Homo sapiens GN=EMD PE=1 SV=1 - [EMD_HUMAN]                                                            | 0.879 | 0.017 |
| P0C0S5   | Histone H2A.Z OS=Homo sapiens GN=H2AFZ PE=1 SV=2 - [H2AZ_HUMAN]                                                  | 0.880 | 0.035 |
| O43324   | Eukaryotic translation elongation factor 1 epsilon-1 OS=Homo sapiens GN=EEF1E1 PE=1 SV=1 - [MCA3_HUMAN]          | 0.881 | 0.043 |
| Q8IXQ4-2 | Isoform 2 of Uncharacterized protein KIAA1704 OS=Homo sapiens GN=KIAA1704 - [K1704_HUMAN]                        | 0.882 | 0.038 |
| Q9H0E3-2 | Isoform 2 of Histone deacetylase complex subunit SAP130 OS=Homo sapiens GN=SAP130 - [SP130_HUMAN]                | 0.883 | 0.030 |
| Q96JG6   | Coiled-coil domain-containing protein 132 OS=Homo sapiens GN=CCDC132 PE=1 SV=3 - [CC132_HUMAN]                   | 0.884 | 0.023 |
| Q9H2W6   | 39S ribosomal protein L46, mitochondrial OS=Homo sapiens GN=MRPL46 PE=1 SV=1 - [RM46_HUMAN]                      | 0.884 | 0.021 |
| Q06609-2 | Isoform 2 of DNA repair protein RAD51 homolog 1 OS=Homo sapiens GN=RAD51 - [RAD51_HUMAN]                         | 0.885 | 0.018 |
| Q14191   | Werner syndrome ATP-dependent helicase OS=Homo sapiens GN=WRN PE=1 SV=2 - [WRN_HUMAN]                            | 0.886 | 0.006 |
| Q5HYK3   | 2-methoxy-6-polyprenyl-1,4-benzoquinol methylase, mitochondrial OS=Homo sapiens GN=COQ5 PE=1 SV=2 - [COQ5_HUMAN] | 0.891 | 0.007 |
| P27695   | DNA-(apurinic or apyrimidinic site) lyase OS=Homo sapiens GN=APEX1 PE=1 SV=2 - [APEX1_HUMAN]                     | 0.891 | 0.026 |
| Q9NUE0   | Palmitoyltransferase ZDHHC18 OS=Homo sapiens GN=ZDHHC18 PE=2 SV=2 - [ZDH18_HUMAN]                                | 0.892 | 0.016 |
| Q9HD23-2 | Isoform 2 of Magnesium transporter MRS2 homolog, mitochondrial OS=Homo sapiens GN=MRS2 - [MRS2_HUMAN]            | 0.892 | 0.018 |
| P48506   | Glutamate--cysteine ligase catalytic subunit OS=Homo sapiens GN=GCLC PE=1 SV=2 - [GSH1_HUMAN]                    | 0.894 | 0.033 |
| P34949   | Mannose-6-phosphate isomerase OS=Homo sapiens GN=MPI PE=1 SV=2 - [MPI_HUMAN]                                     | 0.894 | 0.025 |
| Q9UJY4   | ADP-ribosylation factor-binding protein GGA2 OS=Homo sapiens GN=GGA2 PE=1 SV=3 - [GGA2_HUMAN]                    | 0.897 | 0.037 |
| Q96Q89-4 | Isoform 4 of Kinesin-like protein KIF20B OS=Homo sapiens GN=KIF20B - [KI20B_HUMAN]                               | 0.899 | 0.001 |
| P18859   | ATP synthase-coupling factor 6, mitochondrial OS=Homo sapiens GN=ATP5J PE=1 SV=1 - [ATP5J_HUMAN]                 | 0.900 | 0.010 |
| O15212   | Prefoldin subunit 6 OS=Homo sapiens GN=PFDN6 PE=1 SV=1 - [PFD6_HUMAN]                                            | 0.900 | 0.047 |
| P51636-3 | Isoform C of Caveolin-2 OS=Homo sapiens GN=CAV2 - [CAV2_HUMAN]                                                   | 0.901 | 0.000 |
| Q9HBR0   | Putative sodium-coupled neutral amino acid transporter 10 OS=Homo sapiens GN=SLC38A10 PE=1 SV=2 - [S38AA_HUMAN]  | 0.903 | 0.016 |
| Q92966   | snRNA-activating protein complex subunit 3 OS=Homo sapiens GN=SNAPC3 PE=1 SV=1 - [SNPC3_HUMAN]                   | 0.903 | 0.028 |
| Q9UBP0-4 | Isoform 4 of Spastin OS=Homo sapiens GN=SPAST - [SPAST_HUMAN]                                                    | 0.904 | 0.017 |
| Q8IZM8   | Zinc finger protein 654 OS=Homo sapiens GN=ZNF654 PE=1 SV=3 - [ZN654_HUMAN]                                      | 0.904 | 0.002 |
| P08195   | 4F2 cell-surface antigen heavy chain OS=Homo sapiens GN=SLC3A2 PE=1 SV=3 - [4F2_HUMAN]                           | 0.905 | 0.021 |
| Q9Y3B9   | RRP15-like protein OS=Homo sapiens GN=RRP15 PE=1 SV=2 - [RRP15_HUMAN]                                            | 0.906 | 0.025 |
| P07108   | Acyl-CoA-binding protein OS=Homo sapiens GN=DBI PE=1 SV=2 - [ACBP_HUMAN]                                         | 0.907 | 0.008 |
| Q9UKR5   | Probable ergosterol biosynthetic protein 28 OS=Homo sapiens GN=C14orf1 PE=1 SV=1 - [ERG28_HUMAN]                 | 0.908 | 0.000 |
| O60826   | Coiled-coil domain-containing protein 22 OS=Homo sapiens GN=CCDC22 PE=1 SV=1 - [CCD22_HUMAN]                     | 0.908 | 0.048 |

|          |                                                                                                                                   |       |       |
|----------|-----------------------------------------------------------------------------------------------------------------------------------|-------|-------|
| Q12931   | Heat shock protein 75 kDa, mitochondrial OS=Homo sapiens GN=TRAP1 PE=1 SV=3 - [TRAP1_HUMAN]                                       | 0.910 | 0.034 |
| Q8TD19   | Serine/threonine-protein kinase Nek9 OS=Homo sapiens GN=NEK9 PE=1 SV=2 - [NEK9_HUMAN]                                             | 0.911 | 0.044 |
| P24385   | G1/S-specific cyclin-D1 OS=Homo sapiens GN=CCND1 PE=1 SV=1 - [CCND1_HUMAN]                                                        | 0.913 | 0.032 |
| Q12986-2 | Isoform 2 of Transcriptional repressor NF-X1 OS=Homo sapiens GN=NFX1 - [NFX1_HUMAN]                                               | 0.915 | 0.009 |
| Q96KP1   | Exocyst complex component 2 OS=Homo sapiens GN=EXOC2 PE=1 SV=1 - [EXOC2_HUMAN]                                                    | 0.917 | 0.003 |
| Q13049   | E3 ubiquitin-protein ligase TRIM32 OS=Homo sapiens GN=TRIM32 PE=1 SV=2 - [TRIM32_HUMAN]                                           | 0.919 | 0.010 |
| Q9UDT6-2 | Isoform 2 of CAP-Gly domain-containing linker protein 2 OS=Homo sapiens GN=CLIP2 - [CLIP2_HUMAN]                                  | 0.920 | 0.032 |
| Q16563-2 | Isoform 2 of Synaptophysin-like protein 1 OS=Homo sapiens GN=SYPL1 - [SYPL1_HUMAN]                                                | 0.920 | 0.008 |
| Q3KQV9   | UDP-N-acetylhexosamine pyrophosphorylase-like protein 1 OS=Homo sapiens GN=UAP1L1 PE=2 SV=2 - [UAP1L_HUMAN]                       | 0.923 | 0.032 |
| O00429-4 | Isoform 3 of Dynamin-1-like protein OS=Homo sapiens GN=DNM1L - [DNM1L_HUMAN]                                                      | 0.925 | 0.028 |
| Q9H0G5   | Nuclear speckle splicing regulatory protein 1 OS=Homo sapiens GN=NSRP1 PE=1 SV=1 - [NSRP1_HUMAN]                                  | 0.927 | 0.022 |
| Q9BX63-2 | Isoform 2 of Fanconi anemia group J protein OS=Homo sapiens GN=BRIP1 - [FANCI_HUMAN]                                              | 0.930 | 0.008 |
| Q92685   | Dol-P-Man:Man(5)GlcNAc(2)-PP-Dol alpha-1,3-mannosyltransferase OS=Homo sapiens GN=ALG3 PE=1 SV=1 - [ALG3_HUMAN]                   | 0.931 | 0.038 |
| Q8N9N7   | Leucine-rich repeat-containing protein 57 OS=Homo sapiens GN=LRRC57 PE=1 SV=1 - [LRC57_HUMAN]                                     | 0.932 | 0.025 |
| P61204   | ADP-ribosylation factor 3 OS=Homo sapiens GN=ARF3 PE=1 SV=2 - [ARF3_HUMAN]                                                        | 0.932 | 0.032 |
| P49257   | Protein ERGIC-53 OS=Homo sapiens GN=LMAN1 PE=1 SV=2 - [LMAN1_HUMAN]                                                               | 0.932 | 0.012 |
| Q9P2X3   | Protein IMPACT OS=Homo sapiens GN=IMPACT PE=1 SV=2 - [IMPACT_HUMAN]                                                               | 0.933 | 0.018 |
| P06730   | Eukaryotic translation initiation factor 4E OS=Homo sapiens GN=EIF4E PE=1 SV=2 - [IF4E_HUMAN]                                     | 0.934 | 0.029 |
| P15408-3 | Isoform 3 of Fos-related antigen 2 OS=Homo sapiens GN=FOSL2 - [FOSL2_HUMAN]                                                       | 0.934 | 0.022 |
| Q9BV79-2 | Isoform 2 of Trans-2-enoyl-CoA reductase, mitochondrial OS=Homo sapiens GN=MECR - [MECR_HUMAN]                                    | 0.937 | 0.034 |
| O95613   | Pericentrin OS=Homo sapiens GN=PCNT PE=1 SV=4 - [PCNT_HUMAN]                                                                      | 0.937 | 0.025 |
| O43314-2 | Isoform 2 of Inositol hexakisphosphate and diphosphoinositol-pentakisphosphate kinase 2 OS=Homo sapiens GN=PPIP5K2 - [VIP2_HUMAN] | 0.937 | 0.043 |
| Q14457   | Beclin-1 OS=Homo sapiens GN=BECN1 PE=1 SV=2 - [BECN1_HUMAN]                                                                       | 0.939 | 0.033 |
| Q96AE7   | Tetratricopeptide repeat protein 17 OS=Homo sapiens GN=TTC17 PE=1 SV=1 - [TTC17_HUMAN]                                            | 0.939 | 0.021 |
| O94761   | ATP-dependent DNA helicase Q4 OS=Homo sapiens GN=RECQL4 PE=1 SV=1 - [RECQ4_HUMAN]                                                 | 0.939 | 0.034 |
| Q9NY27-3 | Isoform 3 of Serine/threonine-protein phosphatase 4 regulatory subunit 2 OS=Homo sapiens GN=PPP4R2 - [PP4R2_HUMAN]                | 0.940 | 0.032 |
| P15260   | Interferon gamma receptor 1 OS=Homo sapiens GN=IFNGR1 PE=1 SV=1 - [INGR1_HUMAN]                                                   | 0.940 | 0.039 |
| Q6NUK1   | Calcium-binding mitochondrial carrier protein SCaMC-1 OS=Homo sapiens GN=SLC25A24 PE=1 SV=2 - [SCMC1_HUMAN]                       | 0.941 | 0.035 |
| O94826   | Mitochondrial import receptor subunit TOM70 OS=Homo sapiens GN=TOMM70A PE=1 SV=1 - [TOM70_HUMAN]                                  | 0.942 | 0.018 |



|          |                                                                                                                           |       |       |
|----------|---------------------------------------------------------------------------------------------------------------------------|-------|-------|
| Q96BJ3   | Axin interactor, dorsalization-associated protein OS=Homo sapiens GN=AIDA PE=1 SV=1 - [AIDA_HUMAN]                        | 0.943 | 0.025 |
| Q8N138-4 | Isoform 2 of ORM1-like protein 3 OS=Homo sapiens GN=ORMDL3 - [ORML3_HUMAN]                                                | 0.946 | 0.027 |
| P24928   | DNA-directed RNA polymerase II subunit RPB1 OS=Homo sapiens GN=POLR2A PE=1 SV=2 - [RPB1_HUMAN]                            | 0.947 | 0.027 |
| O14979-3 | Isoform 3 of Heterogeneous nuclear ribonucleoprotein D-like OS=Homo sapiens GN=HNRPDL - [HNRDL_HUMAN]                     | 0.948 | 0.044 |
| Q71RC2-3 | Isoform 3 of La-related protein 4 OS=Homo sapiens GN=LARP4 - [LARP4_HUMAN]                                                | 0.948 | 0.029 |
| Q9H082   | Ras-related protein Rab-33B OS=Homo sapiens GN=RAB33B PE=1 SV=1 - [RB33B_HUMAN]                                           | 0.949 | 0.048 |
| Q75QN2-2 | Isoform 2 of Integrator complex subunit 8 OS=Homo sapiens GN=INTS8 - [INT8_HUMAN]                                         | 0.949 | 0.046 |
| Q9UPP1-3 | Isoform 3 of Histone lysine demethylase PHF8 OS=Homo sapiens GN=PHF8 - [PHF8_HUMAN]                                       | 0.949 | 0.041 |
| Q8N653   | Leucine-zipper-like transcriptional regulator 1 OS=Homo sapiens GN=LZTR1 PE=2 SV=2 - [LZTR1_HUMAN]                        | 0.950 | 0.041 |
| Q5GLZ8-6 | Isoform 6 of Probable E3 ubiquitin-protein ligase HERC4 OS=Homo sapiens GN=HERC4 - [HERC4_HUMAN]                          | 0.951 | 0.028 |
| Q9Y4W6   | AFG3-like protein 2 OS=Homo sapiens GN=AFG3L2 PE=1 SV=2 - [AFG32_HUMAN]                                                   | 0.952 | 0.016 |
| Q96DE0   | U8 snoRNA-decapping enzyme OS=Homo sapiens GN=NUDT16 PE=1 SV=2 - [NUD16_HUMAN]                                            | 0.955 | 0.035 |
| O00151   | PDZ and LIM domain protein 1 OS=Homo sapiens GN=PDLIM1 PE=1 SV=4 - [PDL1_HUMAN]                                           | 0.955 | 0.035 |
| Q5VYS8-4 | Isoform 4 of Terminal uridylyltransferase 7 OS=Homo sapiens GN=ZCCHC6 - [TUT7_HUMAN]                                      | 0.955 | 0.014 |
| Q9BYW2   | Histone-lysine N-methyltransferase SETD2 OS=Homo sapiens GN=SETD2 PE=1 SV=3 - [SETD2_HUMAN]                               | 0.957 | 0.027 |
| P09496-2 | Isoform Non-brain of Clathrin light chain A OS=Homo sapiens GN=CLTA - [CLCA_HUMAN]                                        | 0.957 | 0.040 |
| P52788   | Spermine synthase OS=Homo sapiens GN=SMS PE=1 SV=2 - [SPSY_HUMAN]                                                         | 0.957 | 0.047 |
| P62424   | 60S ribosomal protein L7a OS=Homo sapiens GN=RPL7A PE=1 SV=2 - [RL7A_HUMAN]                                               | 0.957 | 0.018 |
| P31937   | 3-hydroxyisobutyrate dehydrogenase, mitochondrial OS=Homo sapiens GN=HIBADH PE=1 SV=2 - [3HIDH_HUMAN]                     | 0.959 | 0.033 |
| P51151   | Ras-related protein Rab-9A OS=Homo sapiens GN=RAB9A PE=1 SV=1 - [RAB9A_HUMAN]                                             | 0.960 | 0.019 |
| P14921-2 | Isoform c-ETS-1B of Protein C-ets-1 OS=Homo sapiens GN=ETS1 - [ETS1_HUMAN]                                                | 0.960 | 0.045 |
| Q86YV9   | Hermansky-Pudlak syndrome 6 protein OS=Homo sapiens GN=HPS6 PE=1 SV=1 - [HPS6_HUMAN]                                      | 0.961 | 0.034 |
| P31040   | Succinate dehydrogenase [ubiquinone] flavoprotein subunit, mitochondrial OS=Homo sapiens GN=SDHA PE=1 SV=2 - [DHSA_HUMAN] | 0.963 | 0.016 |
| Q9Y618-5 | Isoform 5 of Nuclear receptor corepressor 2 OS=Homo sapiens GN=NCOR2 - [NCOR2_HUMAN]                                      | 0.964 | 0.015 |
| Q9HCD5   | Nuclear receptor coactivator 5 OS=Homo sapiens GN=NCOA5 PE=1 SV=2 - [NCOA5_HUMAN]                                         | 0.967 | 0.016 |
| Q9HCG8   | Pre-mRNA-splicing factor CWC22 homolog OS=Homo sapiens GN=CWC22 PE=1 SV=3 - [CWC22_HUMAN]                                 | 0.972 | 0.004 |
| Q9BXW9-2 | Isoform 2 of Fanconi anemia group D2 protein OS=Homo sapiens GN=FANCD2 - [FACD2_HUMAN]                                    | 0.973 | 0.028 |
| Q99543   | DnaJ homolog subfamily C member 2 OS=Homo sapiens GN=DNAJC2 PE=1 SV=4 - [DNJC2_HUMAN]                                     | 0.982 | 0.025 |
| Q16512   | Serine/threonine-protein kinase N1 OS=Homo sapiens GN=PKN1 PE=1 SV=2 - [PKN1_HUMAN]                                       | 0.985 | 0.049 |

|          |                                                                                                                   |       |       |
|----------|-------------------------------------------------------------------------------------------------------------------|-------|-------|
| P51858   | Hepatoma-derived growth factor OS=Homo sapiens GN=HDGF PE=1 SV=1 - [HDGF_HUMAN]                                   | 0.986 | 0.033 |
| Q16643   | Drebrin OS=Homo sapiens GN=DBN1 PE=1 SV=4 - [DREB_HUMAN]                                                          | 0.997 | 0.014 |
| P53992   | Protein transport protein Sec24C OS=Homo sapiens GN=SEC24C PE=1 SV=3 - [SC24C_HUMAN]                              | 1.015 | 0.045 |
| O15031   | Plexin-B2 OS=Homo sapiens GN=PLXNB2 PE=1 SV=3 - [PLXB2_HUMAN]                                                     | 1.016 | 0.017 |
| P41252   | Isoleucine--tRNA ligase, cytoplasmic OS=Homo sapiens GN=IARS PE=1 SV=2 - [SYIC_HUMAN]                             | 1.025 | 0.048 |
| P42574   | Caspase-3 OS=Homo sapiens GN=CASP3 PE=1 SV=2 - [CASP3_HUMAN]                                                      | 1.025 | 0.049 |
| Q9NSE4   | Isoleucine--tRNA ligase, mitochondrial OS=Homo sapiens GN=IARS2 PE=1 SV=2 - [SYIM_HUMAN]                          | 1.025 | 0.029 |
| Q8NFW8   | N-acylneuraminate cytidyltransferase OS=Homo sapiens GN=CMAS PE=1 SV=2 - [NEUA_HUMAN]                             | 1.026 | 0.043 |
| Q14012   | Calcium/calmodulin-dependent protein kinase type 1 OS=Homo sapiens GN=CAMK1 PE=1 SV=1 - [KCC1A_HUMAN]             | 1.031 | 0.038 |
| P06400   | Retinoblastoma-associated protein OS=Homo sapiens GN=RB1 PE=1 SV=2 - [RB_HUMAN]                                   | 1.032 | 0.011 |
| Q99613   | Eukaryotic translation initiation factor 3 subunit C OS=Homo sapiens GN=EIF3C PE=1 SV=1 - [EIF3C_HUMAN]           | 1.034 | 0.030 |
| P11441   | Ubiquitin-like protein 4A OS=Homo sapiens GN=UBL4A PE=1 SV=1 - [UBL4A_HUMAN]                                      | 1.035 | 0.041 |
| Q02543   | 60S ribosomal protein L18a OS=Homo sapiens GN=RPL18A PE=1 SV=2 - [RL18A_HUMAN]                                    | 1.035 | 0.004 |
| Q13765   | Nascent polypeptide-associated complex subunit alpha OS=Homo sapiens GN=NACA PE=1 SV=1 - [NACA_HUMAN]             | 1.037 | 0.039 |
| P17706-2 | Isoform PTPA of Tyrosine-protein phosphatase non-receptor type 2 OS=Homo sapiens GN=PTPN2 - [PTN2_HUMAN]          | 1.037 | 0.034 |
| Q9UJX5   | Anaphase-promoting complex subunit 4 OS=Homo sapiens GN=ANAPC4 PE=1 SV=2 - [APC4_HUMAN]                           | 1.038 | 0.045 |
| P36551   | Coproporphyrinogen-III oxidase, mitochondrial OS=Homo sapiens GN=CPOX PE=1 SV=3 - [HEM6_HUMAN]                    | 1.040 | 0.040 |
| Q9P2J5   | Leucine--tRNA ligase, cytoplasmic OS=Homo sapiens GN=LARS PE=1 SV=2 - [SYLC_HUMAN]                                | 1.041 | 0.012 |
| Q96KA5-2 | Isoform 2 of Cleft lip and palate transmembrane protein 1-like protein OS=Homo sapiens GN=CLPTM1L - [CLP1L_HUMAN] | 1.044 | 0.043 |
| O95376   | E3 ubiquitin-protein ligase ARIH2 OS=Homo sapiens GN=ARIH2 PE=1 SV=1 - [ARI2_HUMAN]                               | 1.045 | 0.045 |
| P27448-3 | Isoform 3 of MAP/microtubule affinity-regulating kinase 3 OS=Homo sapiens GN=MARK3 - [MARK3_HUMAN]                | 1.046 | 0.047 |
| O15269   | Serine palmitoyltransferase 1 OS=Homo sapiens GN=SPTLC1 PE=1 SV=1 - [SPTC1_HUMAN]                                 | 1.046 | 0.007 |
| Q6ZUT1   | Uncharacterized protein C11orf57 OS=Homo sapiens GN=C11orf57 PE=1 SV=2 - [CK057_HUMAN]                            | 1.048 | 0.022 |
| Q9Y6A5   | Transforming acidic coiled-coil-containing protein 3 OS=Homo sapiens GN=TACC3 PE=1 SV=1 - [TACC3_HUMAN]           | 1.048 | 0.009 |
| P48723   | Heat shock 70 kDa protein 13 OS=Homo sapiens GN=HSPA13 PE=1 SV=1 - [HSP13_HUMAN]                                  | 1.049 | 0.036 |
| O75694-2 | Isoform 2 of Nuclear pore complex protein Nup155 OS=Homo sapiens GN=NUP155 - [NU155_HUMAN]                        | 1.050 | 0.037 |
| Q7RTV5   | UPF0308 protein C9orf21 OS=Homo sapiens GN=C9orf21 PE=2 SV=1 - [CI021_HUMAN]                                      | 1.050 | 0.014 |
| Q7Z3B4   | Nucleoporin p54 OS=Homo sapiens GN=NUP54 PE=1 SV=2 - [NUP54_HUMAN]                                                | 1.051 | 0.045 |
| P00491   | Purine nucleoside phosphorylase OS=Homo sapiens GN=PNP PE=1 SV=2 - [PNPH_HUMAN]                                   | 1.051 | 0.018 |

|          |                                                                                                                             |       |       |
|----------|-----------------------------------------------------------------------------------------------------------------------------|-------|-------|
| Q04837   | Single-stranded DNA-binding protein, mitochondrial OS=Homo sapiens GN=SSBP1 PE=1 SV=1 - [SSBP_HUMAN]                        | 1.051 | 0.029 |
| Q96RL7-4 | Isoform 4 of Vacuolar protein sorting-associated protein 13A OS=Homo sapiens GN=VPS13A - [VP13A_HUMAN]                      | 1.052 | 0.044 |
| P54136   | Arginine--tRNA ligase, cytoplasmic OS=Homo sapiens GN=RARS PE=1 SV=2 - [SYRC_HUMAN]                                         | 1.052 | 0.026 |
| Q8N5M1   | ATP synthase mitochondrial F1 complex assembly factor 2 OS=Homo sapiens GN=ATPAF2 PE=1 SV=1 - [ATPF2_HUMAN]                 | 1.053 | 0.014 |
| Q9UKB1-2 | Isoform A of F-box/WD repeat-containing protein 11 OS=Homo sapiens GN=FBXW11 - [FBW1B_HUMAN]                                | 1.054 | 0.049 |
| Q9Y2L9-2 | Isoform 2 of Leucine-rich repeat and calponin homology domain-containing protein 1 OS=Homo sapiens GN=LRCH1 - [LRCH1_HUMAN] | 1.055 | 0.033 |
| P62841   | 40S ribosomal protein S15 OS=Homo sapiens GN=RPS15 PE=1 SV=2 - [RS15_HUMAN]                                                 | 1.055 | 0.046 |
| Q9H0H5   | Rac GTPase-activating protein 1 OS=Homo sapiens GN=RACGAP1 PE=1 SV=1 - [RGAP1_HUMAN]                                        | 1.055 | 0.033 |
| Q93008-1 | Isoform 2 of Probable ubiquitin carboxyl-terminal hydrolase FAF-X OS=Homo sapiens GN=USP9X - [USP9X_HUMAN]                  | 1.056 | 0.033 |
| Q8TDW4-8 | Isoform 8 of Suppressor of tumorigenicity 7 protein-like OS=Homo sapiens GN=ST7L - [ST7L_HUMAN]                             | 1.057 | 0.048 |
| P25786   | Proteasome subunit alpha type-1 OS=Homo sapiens GN=PSMA1 PE=1 SV=1 - [PSA1_HUMAN]                                           | 1.057 | 0.018 |
| P08238   | Heat shock protein HSP 90-beta OS=Homo sapiens GN=HSP90AB1 PE=1 SV=4 - [HS90B_HUMAN]                                        | 1.058 | 0.029 |
| O60524-4 | Isoform 4 of Nuclear export mediator factor NEMF OS=Homo sapiens GN=NEMF - [NEMF_HUMAN]                                     | 1.058 | 0.010 |
| Q13613-2 | Isoform 1A of Myotubularin-related protein 1 OS=Homo sapiens GN=MTMR1 - [MTMR1_HUMAN]                                       | 1.058 | 0.001 |
| P43034   | Platelet-activating factor acetylhydrolase IB subunit alpha OS=Homo sapiens GN=PFAFH1B1 PE=1 SV=2 - [LIS1_HUMAN]            | 1.065 | 0.011 |
| P39748   | Flap endonuclease 1 OS=Homo sapiens GN=FEN1 PE=1 SV=1 - [FEN1_HUMAN]                                                        | 1.065 | 0.005 |
| P62266   | 40S ribosomal protein S23 OS=Homo sapiens GN=RPS23 PE=1 SV=3 - [RS23_HUMAN]                                                 | 1.067 | 0.035 |
| Q15006   | Tetratricopeptide repeat protein 35 OS=Homo sapiens GN=TTC35 PE=1 SV=1 - [TTC35_HUMAN]                                      | 1.067 | 0.017 |
| P37802   | Transgelin-2 OS=Homo sapiens GN=TAGLN2 PE=1 SV=3 - [TAGL2_HUMAN]                                                            | 1.068 | 0.036 |
| O60493   | Sorting nexin-3 OS=Homo sapiens GN=SNX3 PE=1 SV=3 - [SNX3_HUMAN]                                                            | 1.068 | 0.010 |
| Q53GS9   | U4/U6.U5 tri-snRNP-associated protein 2 OS=Homo sapiens GN=USP39 PE=1 SV=2 - [SNUT2_HUMAN]                                  | 1.069 | 0.041 |
| Q9NP79   | Vacuolar protein sorting-associated protein VTA1 homolog OS=Homo sapiens GN=VTA1 PE=1 SV=1 - [VTA1_HUMAN]                   | 1.069 | 0.038 |
| O60812   | Heterogeneous nuclear ribonucleoprotein C-like 1 OS=Homo sapiens GN=HNRNPCL1 PE=1 SV=1 - [HNRCL_HUMAN]                      | 1.070 | 0.001 |
| Q99797   | Mitochondrial intermediate peptidase OS=Homo sapiens GN=MIPEP PE=1 SV=2 - [MIPEP_HUMAN]                                     | 1.071 | 0.050 |
| Q99661-2 | Isoform 2 of Kinesin-like protein KIF2C OS=Homo sapiens GN=KIF2C - [KIF2C_HUMAN]                                            | 1.072 | 0.034 |
| P40189   | Interleukin-6 receptor subunit beta OS=Homo sapiens GN=IL6ST PE=1 SV=2 - [IL6RB_HUMAN]                                      | 1.073 | 0.039 |
| Q5SXM8   | DNL-type zinc finger protein OS=Homo sapiens GN=DNLZ PE=2 SV=1 - [DNLZ_HUMAN]                                               | 1.073 | 0.021 |
| Q9NVG8   | TBC1 domain family member 13 OS=Homo sapiens GN=TBC1D13 PE=1 SV=3 - [TBC13_HUMAN]                                           | 1.074 | 0.015 |
| Q9BYG3   | MKI67 FHA domain-interacting nucleolar phosphoprotein OS=Homo sapiens GN=MKI67IP PE=1 SV=1 - [MK67I_HUMAN]                  | 1.075 | 0.011 |

|          |                                                                                                                     |       |       |
|----------|---------------------------------------------------------------------------------------------------------------------|-------|-------|
| Q8N6Y2-2 | Isoform 2 of Leucine-rich repeat-containing protein 17 OS=Homo sapiens GN=LRR17 - [LRR17_HUMAN]                     | 1.076 | 0.014 |
| P21281   | V-type proton ATPase subunit B, brain isoform OS=Homo sapiens GN=ATP6V1B2 PE=1 SV=3 - [VATB2_HUMAN]                 | 1.077 | 0.039 |
| P52565   | Rho GDP-dissociation inhibitor 1 OS=Homo sapiens GN=ARHGDI1 PE=1 SV=3 - [GDIR1_HUMAN]                               | 1.077 | 0.049 |
| Q9BWD1   | Acetyl-CoA acetyltransferase, cytosolic OS=Homo sapiens GN=ACAT2 PE=1 SV=2 - [THIC_HUMAN]                           | 1.077 | 0.037 |
| P42285   | Superkiller viralicidic activity 2-like 2 OS=Homo sapiens GN=SKIV2L2 PE=1 SV=3 - [SK2L2_HUMAN]                      | 1.079 | 0.037 |
| P48147   | Prolyl endopeptidase OS=Homo sapiens GN=PREP PE=1 SV=2 - [PPCE_HUMAN]                                               | 1.079 | 0.039 |
| Q658Y4   | Protein FAM91A1 OS=Homo sapiens GN=FAM91A1 PE=1 SV=3 - [F91A1_HUMAN]                                                | 1.080 | 0.029 |
| Q9BYT8   | Neurolysin, mitochondrial OS=Homo sapiens GN=NLN PE=1 SV=1 - [NEUL_HUMAN]                                           | 1.081 | 0.044 |
| Q96GM8   | Target of EGR1 protein 1 OS=Homo sapiens GN=TOE1 PE=1 SV=1 - [TOE1_HUMAN]                                           | 1.083 | 0.032 |
| P28066   | Proteasome subunit alpha type-5 OS=Homo sapiens GN=PSMA5 PE=1 SV=3 - [PSA5_HUMAN]                                   | 1.083 | 0.008 |
| Q9H0U4   | Ras-related protein Rab-1B OS=Homo sapiens GN=RAB1B PE=1 SV=1 - [RAB1B_HUMAN]                                       | 1.083 | 0.031 |
| P62070   | Ras-related protein R-Ras2 OS=Homo sapiens GN=RRAS2 PE=1 SV=1 - [RRAS2_HUMAN]                                       | 1.083 | 0.019 |
| Q15648   | Mediator of RNA polymerase II transcription subunit 1 OS=Homo sapiens GN=MED1 PE=1 SV=4 - [MED1_HUMAN]              | 1.084 | 0.021 |
| P61970   | Nuclear transport factor 2 OS=Homo sapiens GN=NUTF2 PE=1 SV=1 - [NTF2_HUMAN]                                        | 1.086 | 0.022 |
| Q8WUA2   | Peptidyl-prolyl cis-trans isomerase-like 4 OS=Homo sapiens GN=PPIL4 PE=1 SV=1 - [PPIL4_HUMAN]                       | 1.087 | 0.003 |
| Q9NYK5   | 39S ribosomal protein L39, mitochondrial OS=Homo sapiens GN=MRPL39 PE=1 SV=3 - [RM39_HUMAN]                         | 1.087 | 0.044 |
| O95067   | G2/mitotic-specific cyclin-B2 OS=Homo sapiens GN=CCNB2 PE=1 SV=1 - [CCNB2_HUMAN]                                    | 1.087 | 0.017 |
| Q9BRS2   | Serine/threonine-protein kinase RIO1 OS=Homo sapiens GN=RIOK1 PE=1 SV=2 - [RIOK1_HUMAN]                             | 1.088 | 0.027 |
| Q96P11   | Putative methyltransferase NSUN5 OS=Homo sapiens GN=NSUN5 PE=1 SV=2 - [NSUN5_HUMAN]                                 | 1.088 | 0.023 |
| O95164   | Ubiquitin-like protein 3 OS=Homo sapiens GN=UBL3 PE=1 SV=1 - [UBL3_HUMAN]                                           | 1.089 | 0.040 |
| P82914   | 28S ribosomal protein S15, mitochondrial OS=Homo sapiens GN=MRPS15 PE=1 SV=1 - [RT15_HUMAN]                         | 1.089 | 0.041 |
| Q9Y2L5-2 | Isoform 2 of Trafficking protein particle complex subunit 8 OS=Homo sapiens GN=TRAPPC8 - [TPPC8_HUMAN]              | 1.091 | 0.003 |
| P00505   | Aspartate aminotransferase, mitochondrial OS=Homo sapiens GN=GOT2 PE=1 SV=3 - [AATM_HUMAN]                          | 1.092 | 0.009 |
| Q9UIL8-2 | Isoform 2 of PHD finger protein 11 OS=Homo sapiens GN=PHF11 - [PHF11_HUMAN]                                         | 1.092 | 0.031 |
| Q96T37-2 | Isoform 2 of Putative RNA-binding protein 15 OS=Homo sapiens GN=RBM15 - [RBM15_HUMAN]                               | 1.093 | 0.029 |
| P35659   | Protein DEK OS=Homo sapiens GN=DEK PE=1 SV=1 - [DEK_HUMAN]                                                          | 1.096 | 0.034 |
| P11177-2 | Isoform 2 of Pyruvate dehydrogenase E1 component subunit beta, mitochondrial OS=Homo sapiens GN=PDHB - [ODPB_HUMAN] | 1.101 | 0.040 |
| P09104   | Gamma-enolase OS=Homo sapiens GN=ENO2 PE=1 SV=3 - [ENOG_HUMAN]                                                      | 1.104 | 0.046 |
| Q9NV35   | Probable 7,8-dihydro-8-oxoguanine triphosphatase NUDT15 OS=Homo sapiens GN=NUDT15 PE=1 SV=1 - [NUDT15_HUMAN]        | 1.106 | 0.029 |

|          |                                                                                                          |       |       |
|----------|----------------------------------------------------------------------------------------------------------|-------|-------|
| O95163   | Elongator complex protein 1 OS=Homo sapiens GN=IKBKAP PE=1 SV=3 - [ELP1_HUMAN]                           | 1.112 | 0.021 |
| Q00534   | Cyclin-dependent kinase 6 OS=Homo sapiens GN=CDK6 PE=1 SV=1 - [CDK6_HUMAN]                               | 1.117 | 0.006 |
| P52594-2 | Isoform 2 of Arf-GAP domain and FG repeats-containing protein 1 OS=Homo sapiens GN=AGFG1 - [AGFG1_HUMAN] | 1.120 | 0.046 |
| O76021   | Ribosomal L1 domain-containing protein 1 OS=Homo sapiens GN=RSL1D1 PE=1 SV=3 - [RL1D1_HUMAN]             | 1.122 | 0.005 |
| Q8IWB9   | Testis-expressed sequence 2 protein OS=Homo sapiens GN=TEX2 PE=1 SV=2 - [TEX2_HUMAN]                     | 1.123 | 0.019 |
| Q96NW4   | Ankyrin repeat domain-containing protein 27 OS=Homo sapiens GN=ANKRD27 PE=1 SV=2 - [ANR27_HUMAN]         | 1.123 | 0.012 |
| Q2TAY7   | WD40 repeat-containing protein SMU1 OS=Homo sapiens GN=SMU1 PE=1 SV=2 - [SMU1_HUMAN]                     | 1.125 | 0.041 |
| Q96S19-3 | Isoform 3 of UPF0585 protein C16orf13 OS=Homo sapiens GN=C16orf13 - [CP013_HUMAN]                        | 1.125 | 0.029 |
| P49720   | Proteasome subunit beta type-3 OS=Homo sapiens GN=PSMB3 PE=1 SV=2 - [PSB3_HUMAN]                         | 1.128 | 0.036 |
| Q15185   | Prostaglandin E synthase 3 OS=Homo sapiens GN=PTGES3 PE=1 SV=1 - [TEBP_HUMAN]                            | 1.128 | 0.030 |
| Q04721   | Neurogenic locus notch homolog protein 2 OS=Homo sapiens GN=NOTCH2 PE=1 SV=3 - [NOTC2_HUMAN]             | 1.130 | 0.046 |
| Q9P2E9   | Ribosome-binding protein 1 OS=Homo sapiens GN=RRBP1 PE=1 SV=4 - [RRBP1_HUMAN]                            | 1.131 | 0.001 |
| Q8I WV7  | E3 ubiquitin-protein ligase UBR1 OS=Homo sapiens GN=UBR1 PE=1 SV=1 - [UBR1_HUMAN]                        | 1.132 | 0.038 |
| Q9H9J2   | 39S ribosomal protein L44, mitochondrial OS=Homo sapiens GN=MRPL44 PE=1 SV=1 - [RM44_HUMAN]              | 1.137 | 0.016 |
| P55287-2 | Isoform 2 of Cadherin-11 OS=Homo sapiens GN=CDH11 - [CAD11_HUMAN]                                        | 1.140 | 0.021 |
| Q8NFI3-2 | Isoform 2 of Cytosolic endo-beta-N-acetylglucosaminidase OS=Homo sapiens GN=ENGASE - [ENASE_HUMAN]       | 1.140 | 0.006 |
| Q96IF1   | LIM domain-containing protein ajuba OS=Homo sapiens GN=AJUBA PE=1 SV=1 - [AJUBA_HUMAN]                   | 1.142 | 0.001 |
| Q02318   | Sterol 26-hydroxylase, mitochondrial OS=Homo sapiens GN=CYP27A1 PE=1 SV=1 - [CP27A_HUMAN]                | 1.144 | 0.015 |
| O75947   | ATP synthase subunit d, mitochondrial OS=Homo sapiens GN=ATP5H PE=1 SV=3 - [ATP5H_HUMAN]                 | 1.148 | 0.043 |
| Q8IWA4-3 | Isoform 3 of Mitofusin-1 OS=Homo sapiens GN=MFN1 - [MFN1_HUMAN]                                          | 1.148 | 0.016 |
| Q9P0P0   | E3 ubiquitin-protein ligase RNF181 OS=Homo sapiens GN=RNF181 PE=1 SV=1 - [RN181_HUMAN]                   | 1.152 | 0.049 |
| P49757-4 | Isoform 4 of Protein numb homolog OS=Homo sapiens GN=NUMB - [NUMB_HUMAN]                                 | 1.152 | 0.034 |
| Q9H8G2   | Uncharacterized protein C9orf82 OS=Homo sapiens GN=C9orf82 PE=1 SV=2 - [CI082_HUMAN]                     | 1.162 | 0.047 |
| Q96GG9   | DCN1-like protein 1 OS=Homo sapiens GN=DCUN1D1 PE=1 SV=1 - [DCNL1_HUMAN]                                 | 1.166 | 0.017 |
| P61599   | N-alpha-acetyltransferase 20 OS=Homo sapiens GN=NAA20 PE=1 SV=1 - [NAA20_HUMAN]                          | 1.168 | 0.016 |
| O96033   | Molybdopterin synthase sulfur carrier subunit OS=Homo sapiens GN=MOCS2 PE=1 SV=1 - [MOC2A_HUMAN]         | 1.185 | 0.036 |
| Q9UIM3   | FK506-binding protein-like OS=Homo sapiens GN=FKBPL PE=1 SV=1 - [FKBPL_HUMAN]                            | 1.185 | 0.008 |
| Q00535-2 | Isoform 2 of Cyclin-dependent kinase 5 OS=Homo sapiens GN=CDK5 - [CDK5_HUMAN]                            | 1.191 | 0.026 |
| Q2TB10   | Zinc finger protein 800 OS=Homo sapiens GN=ZNF800 PE=1 SV=1 - [ZN800_HUMAN]                              | 1.191 | 0.025 |

|          |                                                                                                                        |       |       |
|----------|------------------------------------------------------------------------------------------------------------------------|-------|-------|
| Q9BYI3   | Hyccin OS=Homo sapiens GN=FAM126A PE=1 SV=2 - [HYCCI_HUMAN]                                                            | 1.206 | 0.027 |
| Q96BA8-2 | Isoform 2 of Cyclic AMP-responsive element-binding protein 3-like protein 1 OS=Homo sapiens GN=CREB3L1 - [CR3L1_HUMAN] | 1.212 | 0.045 |
| P23469-3 | Isoform 3 of Receptor-type tyrosine-protein phosphatase epsilon OS=Homo sapiens GN=PTPRE - [PTPRE_HUMAN]               | 1.221 | 0.047 |
| Q8IVF5   | T-lymphoma invasion and metastasis-inducing protein 2 OS=Homo sapiens GN=TIAM2 PE=2 SV=4 - [TIAM2_HUMAN]               | 1.222 | 0.048 |
| Q15181   | Inorganic pyrophosphatase OS=Homo sapiens GN=PPA1 PE=1 SV=2 - [IPYR_HUMAN]                                             | 1.237 | 0.025 |
| Q9H7D0   | Dedicator of cytokinesis protein 5 OS=Homo sapiens GN=DOCK5 PE=1 SV=3 - [DOCK5_HUMAN]                                  | 1.254 | 0.005 |
| Q8IXH7-4 | Isoform NELF-D of Negative elongation factor C/D OS=Homo sapiens GN=TH1L - [NELFD_HUMAN]                               | 1.289 | 0.017 |
| Q9BYD2   | 39S ribosomal protein L9, mitochondrial OS=Homo sapiens GN=MRPL9 PE=1 SV=2 - [RM09_HUMAN]                              | 1.310 | 0.012 |
| P01889   | HLA class I histocompatibility antigen, B-7 alpha chain OS=Homo sapiens GN=HLA-B PE=1 SV=3 - [1B07_HUMAN]              | 1.318 | 0.029 |
| Q9H3K2   | Growth hormone-inducible transmembrane protein OS=Homo sapiens GN=GHITM PE=1 SV=2 - [GHITM_HUMAN]                      | 1.392 | 0.046 |
| Q9Y2C4   | Nuclease EXOG, mitochondrial OS=Homo sapiens GN=EXOG PE=1 SV=2 - [EXOG_HUMAN]                                          | 1.435 | 0.025 |
| O75880   | Protein SCO1 homolog, mitochondrial OS=Homo sapiens GN=SCO1 PE=1 SV=1 - [SCO1_HUMAN]                                   | 1.465 | 0.034 |
| O15235   | 28S ribosomal protein S12, mitochondrial OS=Homo sapiens GN=MRPS12 PE=1 SV=1 - [RT12_HUMAN]                            | 1.556 | 0.028 |
| O75323   | Protein NipSnap homolog 2 OS=Homo sapiens GN=GBAS PE=1 SV=1 - [NIPS2_HUMAN]                                            | 1.586 | 0.036 |
| P62877   | E3 ubiquitin-protein ligase RBX1 OS=Homo sapiens GN=RBX1 PE=1 SV=1 - [RBX1_HUMAN]                                      | 1.590 | 0.039 |
| Q86VY9   | Transmembrane protein 200A OS=Homo sapiens GN=TMEM200A PE=2 SV=1 - [T200A_HUMAN]                                       | 1.640 | 0.041 |
| Q3B7S5   | Putative uncharacterized protein C18orf62 OS=Homo sapiens GN=C18orf62 PE=1 SV=1 - [CR062_HUMAN]                        | 2.078 | 0.012 |
| Q9BYX7   | Putative beta-actin-like protein 3 OS=Homo sapiens GN=POTEKP PE=5 SV=1 - [ACTBM_HUMAN]                                 | 2.298 | 0.048 |

**HC45 cells - 48 hours lanreotide (397 proteins)**

|          |                                                                                                |       |       |
|----------|------------------------------------------------------------------------------------------------|-------|-------|
| P13473   | Lysosome-associated membrane glycoprotein 2 OS=Homo sapiens GN=LAMP2 PE=1 SV=2 - [LAMP2_HUMAN] | 0.396 | 0.035 |
| P53539   | Protein fosB OS=Homo sapiens GN=FOSB PE=1 SV=1 - [FOSB_HUMAN]                                  | 0.457 | 0.002 |
| P60903   | Protein S100-A10 OS=Homo sapiens GN=S100A10 PE=1 SV=2 - [S10AA_HUMAN]                          | 0.529 | 0.043 |
| Q04695   | Keratin, type I cytoskeletal 17 OS=Homo sapiens GN=KRT17 PE=1 SV=2 - [K1C17_HUMAN]             | 0.542 | 0.009 |
| Q96J01   | THO complex subunit 3 OS=Homo sapiens GN=THOC3 PE=1 SV=1 - [THOC3_HUMAN]                       | 0.545 | 0.023 |
| P0CG34   | Thymosin beta-15A OS=Homo sapiens GN=TMSB15A PE=1 SV=1 - [TB15A_HUMAN]                         | 0.571 | 0.001 |
| O95243-3 | Isoform 3 of Methyl-CpG-binding domain protein 4 OS=Homo sapiens GN=MBD4 - [MBD4_HUMAN]        | 0.595 | 0.014 |
| Q16678   | Cytochrome P450 1B1 OS=Homo sapiens GN=CYP1B1 PE=1 SV=2 - [CP1B1_HUMAN]                        | 0.626 | 0.033 |
| Q9H8M7   | Protein FAM188A OS=Homo sapiens GN=FAM188A PE=1 SV=1 - [F188A_HUMAN]                           | 0.628 | 0.031 |

|          |                                                                                                                 |       |       |
|----------|-----------------------------------------------------------------------------------------------------------------|-------|-------|
| P05114   | Non-histone chromosomal protein HMG-14 OS=Homo sapiens GN=HMGN1 PE=1 SV=3 - [HMGN1_HUMAN]                       | 0.635 | 0.042 |
| O95218-2 | Isoform 2 of Zinc finger Ran-binding domain-containing protein 2 OS=Homo sapiens GN=ZRANB2 - [ZRAB2_HUMAN]      | 0.636 | 0.042 |
| Q16831   | Uridine phosphorylase 1 OS=Homo sapiens GN=UPP1 PE=1 SV=1 - [UPP1_HUMAN]                                        | 0.638 | 0.006 |
| Q15005   | Signal peptidase complex subunit 2 OS=Homo sapiens GN=SPCS2 PE=1 SV=3 - [SPCS2_HUMAN]                           | 0.649 | 0.046 |
| Q9Y4P8-3 | Isoform 3 of WD repeat domain phosphoinositide-interacting protein 2 OS=Homo sapiens GN=WIP12 - [WIP12_HUMAN]   | 0.657 | 0.050 |
| Q6UWJ1-3 | Isoform 3 of Transmembrane and coiled-coil domain-containing protein 3 OS=Homo sapiens GN=TMCO3 - [TMCO3_HUMAN] | 0.667 | 0.036 |
| P09493-3 | Isoform 3 of Tropomyosin alpha-1 chain OS=Homo sapiens GN=TPM1 - [TPM1_HUMAN]                                   | 0.681 | 0.048 |
| O95210   | Starch-binding domain-containing protein 1 OS=Homo sapiens GN=STBD1 PE=1 SV=1 - [STBD1_HUMAN]                   | 0.686 | 0.015 |
| Q9Y314   | Nitric oxide synthase-interacting protein OS=Homo sapiens GN=NOSIP PE=1 SV=1 - [NOSIP_HUMAN]                    | 0.687 | 0.040 |
| Q12982   | BCL2/adenovirus E1B 19 kDa protein-interacting protein 2 OS=Homo sapiens GN=BNIP2 PE=1 SV=1 - [BNIP2_HUMAN]     | 0.690 | 0.015 |
| P42677   | 40S ribosomal protein S27 OS=Homo sapiens GN=RPS27 PE=1 SV=3 - [RS27_HUMAN]                                     | 0.691 | 0.044 |
| P68036   | Ubiquitin-conjugating enzyme E2 L3 OS=Homo sapiens GN=UBE2L3 PE=1 SV=1 - [UB2L3_HUMAN]                          | 0.692 | 0.047 |
| Q6JQN1-4 | Isoform 4 of Acyl-CoA dehydrogenase family member 10 OS=Homo sapiens GN=ACAD10 - [ACD10_HUMAN]                  | 0.697 | 0.022 |
| Q96S52-2 | Isoform 2 of GPI transamidase component PIG-S OS=Homo sapiens GN=PIGS - [PIGS_HUMAN]                            | 0.698 | 0.042 |
| Q15847   | Adipose most abundant gene transcript 2 protein OS=Homo sapiens GN=APM2 PE=1 SV=1 - [APM2_HUMAN]                | 0.699 | 0.029 |
| O75607   | Nucleoplasmin-3 OS=Homo sapiens GN=NPM3 PE=1 SV=3 - [NPM3_HUMAN]                                                | 0.700 | 0.039 |
| P10620   | Microsomal glutathione S-transferase 1 OS=Homo sapiens GN=MGST1 PE=1 SV=1 - [MGST1_HUMAN]                       | 0.703 | 0.030 |
| Q9UPW8   | Protein unc-13 homolog A OS=Homo sapiens GN=UNC13A PE=2 SV=4 - [UN13A_HUMAN]                                    | 0.707 | 0.011 |
| P09429   | High mobility group protein B1 OS=Homo sapiens GN=HMGB1 PE=1 SV=3 - [HMGB1_HUMAN]                               | 0.715 | 0.033 |
| Q9UK76   | Hematological and neurological expressed 1 protein OS=Homo sapiens GN=HN1 PE=1 SV=3 - [HN1_HUMAN]               | 0.720 | 0.042 |
| O60333-3 | Isoform 3 of Kinesin-like protein KIF1B OS=Homo sapiens GN=KIF1B - [KIF1B_HUMAN]                                | 0.724 | 0.011 |
| Q5TAQ9   | DDB1- and CUL4-associated factor 8 OS=Homo sapiens GN=DCAF8 PE=1 SV=1 - [DCAF8_HUMAN]                           | 0.728 | 0.012 |
| Q8WUM9   | Sodium-dependent phosphate transporter 1 OS=Homo sapiens GN=SLC20A1 PE=1 SV=1 - [S20A1_HUMAN]                   | 0.729 | 0.013 |
| P10619   | Lysosomal protective protein OS=Homo sapiens GN=CTSA PE=1 SV=2 - [PPGB_HUMAN]                                   | 0.731 | 0.013 |
| Q13601   | KRR1 small subunit processome component homolog OS=Homo sapiens GN=KRR1 PE=1 SV=4 - [KRR1_HUMAN]                | 0.736 | 0.003 |
| Q15370   | Transcription elongation factor B polypeptide 2 OS=Homo sapiens GN=TCEB2 PE=1 SV=1 - [ELOB_HUMAN]               | 0.744 | 0.026 |
| P55040   | GTP-binding protein GEM OS=Homo sapiens GN=GEM PE=1 SV=1 - [GEM_HUMAN]                                          | 0.748 | 0.039 |
| Q76N89   | E3 ubiquitin-protein ligase HECW1 OS=Homo sapiens GN=HECW1 PE=1 SV=3 - [HECW1_HUMAN]                            | 0.750 | 0.031 |
| Q8NC51-2 | Isoform 2 of Plasminogen activator inhibitor 1 RNA-binding protein OS=Homo sapiens GN=SERP1 - [PAIRB_HUMAN]     | 0.754 | 0.015 |

|          |                                                                                                                          |       |       |
|----------|--------------------------------------------------------------------------------------------------------------------------|-------|-------|
| Q504U0   | Uncharacterized protein C4orf46 OS=Homo sapiens GN=C4orf46 PE=2 SV=1 - [CD046_HUMAN]                                     | 0.755 | 0.041 |
| Q96II8   | Leucine-rich repeat and calponin homology domain-containing protein 3 OS=Homo sapiens GN=LRCH3 PE=1 SV=2 - [LRCH3_HUMAN] | 0.756 | 0.024 |
| Q8NI22   | Multiple coagulation factor deficiency protein 2 OS=Homo sapiens GN=MCFD2 PE=1 SV=1 - [MCFD2_HUMAN]                      | 0.762 | 0.003 |
| Q9H147   | Deoxynucleotidyltransferase terminal-interacting protein 1 OS=Homo sapiens GN=DNTTIP1 PE=1 SV=2 - [TDIF1_HUMAN]          | 0.763 | 0.008 |
| O43759-2 | Isoform 1B of Synaptogyrin-1 OS=Homo sapiens GN=SYNGR1 - [SNG1_HUMAN]                                                    | 0.766 | 0.035 |
| P0C0S5   | Histone H2A.Z OS=Homo sapiens GN=H2AFZ PE=1 SV=2 - [H2AZ_HUMAN]                                                          | 0.766 | 0.016 |
| Q96DG6   | Carboxymethylenebutenolidase homolog OS=Homo sapiens GN=CMBL PE=1 SV=1 - [CMBL_HUMAN]                                    | 0.766 | 0.006 |
| O43865   | Putative adenosylhomocysteinase 2 OS=Homo sapiens GN=AHCYL1 PE=1 SV=2 - [SAHH2_HUMAN]                                    | 0.768 | 0.019 |
| Q9H1C7   | UPF0467 protein C5orf32 OS=Homo sapiens GN=C5orf32 PE=2 SV=1 - [CE032_HUMAN]                                             | 0.770 | 0.035 |
| Q6PCE3   | Glucose 1,6-bisphosphate synthase OS=Homo sapiens GN=PGM2L1 PE=1 SV=3 - [PGM2L_HUMAN]                                    | 0.771 | 0.043 |
| Q05707-2 | Isoform 2 of Collagen alpha-1(XIV) chain OS=Homo sapiens GN=COL14A1 - [COEA1_HUMAN]                                      | 0.771 | 0.046 |
| Q68CZ2   | Tensin-3 OS=Homo sapiens GN=TNS3 PE=1 SV=2 - [TENS3_HUMAN]                                                               | 0.774 | 0.029 |
| P53701   | Cytochrome c-type heme lyase OS=Homo sapiens GN=HCCS PE=1 SV=1 - [CCHL_HUMAN]                                            | 0.775 | 0.044 |
| P63241   | Eukaryotic translation initiation factor 5A-1 OS=Homo sapiens GN=EIF5A PE=1 SV=2 - [IF5A1_HUMAN]                         | 0.778 | 0.031 |
| P41227   | N-alpha-acetyltransferase 10 OS=Homo sapiens GN=NAA10 PE=1 SV=1 - [NAA10_HUMAN]                                          | 0.778 | 0.037 |
| Q16585   | Beta-sarcoglycan OS=Homo sapiens GN=SGCB PE=1 SV=1 - [SGCB_HUMAN]                                                        | 0.779 | 0.007 |
| A8MXV4   | Nucleoside diphosphate-linked moiety X motif 19, mitochondrial OS=Homo sapiens GN=NUDT19 PE=1 SV=1 - [NUDT19_HUMAN]      | 0.781 | 0.016 |
| O43493-2 | Isoform TGN46 of Trans-Golgi network integral membrane protein 2 OS=Homo sapiens GN=TGOLN2 - [TGON2_HUMAN]               | 0.783 | 0.020 |
| Q8N4V1   | Membrane magnesium transporter 1 OS=Homo sapiens GN=MMGT1 PE=1 SV=1 - [MMGT1_HUMAN]                                      | 0.783 | 0.008 |
| O43676   | NADH dehydrogenase [ubiquinone] 1 beta subcomplex subunit 3 OS=Homo sapiens GN=NDUFB3 PE=1 SV=3 - [NDUB3_HUMAN]          | 0.784 | 0.030 |
| P49069   | Calcium signal-modulating cyclophilin ligand OS=Homo sapiens GN=CAMLG PE=1 SV=1 - [CAMLG_HUMAN]                          | 0.784 | 0.046 |
| P61326   | Protein mago nashi homolog OS=Homo sapiens GN=MAGOH PE=1 SV=1 - [MGN_HUMAN]                                              | 0.784 | 0.032 |
| P14921-2 | Isoform c-ETS-1B of Protein C-ets-1 OS=Homo sapiens GN=ETS1 - [ETS1_HUMAN]                                               | 0.787 | 0.002 |
| Q99959-2 | Isoform 1 of Plakophilin-2 OS=Homo sapiens GN=PKP2 - [PKP2_HUMAN]                                                        | 0.788 | 0.026 |
| O75695   | Protein XRP2 OS=Homo sapiens GN=RP2 PE=1 SV=4 - [XRP2_HUMAN]                                                             | 0.788 | 0.001 |
| Q15365   | Poly(rC)-binding protein 1 OS=Homo sapiens GN=PCBP1 PE=1 SV=2 - [PCBP1_HUMAN]                                            | 0.790 | 0.029 |
| P62873   | Guanine nucleotide-binding protein G(I)/G(S)/G(T) subunit beta-1 OS=Homo sapiens GN=GNB1 PE=1 SV=3 - [GBB1_HUMAN]        | 0.790 | 0.020 |
| Q99536   | Synaptic vesicle membrane protein VAT-1 homolog OS=Homo sapiens GN=VAT1 PE=1 SV=2 - [VAT1_HUMAN]                         | 0.790 | 0.048 |
| P60953   | Cell division control protein 42 homolog OS=Homo sapiens GN=CDC42 PE=1 SV=2 - [CDC42_HUMAN]                              | 0.792 | 0.010 |



|          |                                                                                                         |       |       |
|----------|---------------------------------------------------------------------------------------------------------|-------|-------|
| Q9UKD2   | mRNA turnover protein 4 homolog OS=Homo sapiens GN=MRTO4 PE=1 SV=2 - [MRT4_HUMAN]                       | 0.795 | 0.014 |
| Q92551   | Inositol hexakisphosphate kinase 1 OS=Homo sapiens GN=IP6K1 PE=1 SV=3 - [IP6K1_HUMAN]                   | 0.796 | 0.038 |
| Q9H814   | Phosphorylated adapter RNA export protein OS=Homo sapiens GN=PHAX PE=1 SV=1 - [PHAX_HUMAN]              | 0.802 | 0.025 |
| Q02952   | A-kinase anchor protein 12 OS=Homo sapiens GN=AKAP12 PE=1 SV=4 - [AKA12_HUMAN]                          | 0.804 | 0.042 |
| Q86XL3   | Ankyrin repeat and LEM domain-containing protein 2 OS=Homo sapiens GN=ANKLE2 PE=1 SV=4 - [ANKL2_HUMAN]  | 0.807 | 0.006 |
| P04818   | Thymidylate synthase OS=Homo sapiens GN=TYMS PE=1 SV=3 - [TYSY_HUMAN]                                   | 0.810 | 0.040 |
| Q9UL26   | Ras-related protein Rab-22A OS=Homo sapiens GN=RAB22A PE=1 SV=2 - [RB22A_HUMAN]                         | 0.813 | 0.048 |
| O43324   | Eukaryotic translation elongation factor 1 epsilon-1 OS=Homo sapiens GN=EEF1E1 PE=1 SV=1 - [MCA3_HUMAN] | 0.817 | 0.017 |
| O43752   | Syntaxin-6 OS=Homo sapiens GN=STX6 PE=1 SV=1 - [STX6_HUMAN]                                             | 0.819 | 0.018 |
| P00736   | Complement C1r subcomponent OS=Homo sapiens GN=C1R PE=1 SV=2 - [C1R_HUMAN]                              | 0.819 | 0.015 |
| O75347   | Tubulin-specific chaperone A OS=Homo sapiens GN=TBCA PE=1 SV=3 - [TBCA_HUMAN]                           | 0.821 | 0.037 |
| Q9BX40   | Protein LSM14 homolog B OS=Homo sapiens GN=LSM14B PE=1 SV=1 - [LS14B_HUMAN]                             | 0.826 | 0.049 |
| Q9ULJ7   | Ankyrin repeat domain-containing protein 50 OS=Homo sapiens GN=ANKRD50 PE=1 SV=4 - [ANR50_HUMAN]        | 0.826 | 0.017 |
| P27695   | DNA-(apurinic or apyrimidinic site) lyase OS=Homo sapiens GN=APEX1 PE=1 SV=2 - [APEX1_HUMAN]            | 0.827 | 0.002 |
| Q5M775-5 | Isoform 5 of Cytospin-B OS=Homo sapiens GN=SPECC1 - [CYTSB_HUMAN]                                       | 0.831 | 0.048 |
| Q5T3F8   | Transmembrane protein 63B OS=Homo sapiens GN=TMEM63B PE=1 SV=1 - [TM63B_HUMAN]                          | 0.831 | 0.007 |
| Q9NRF8   | CTP synthase 2 OS=Homo sapiens GN=CTPS2 PE=1 SV=1 - [PYRG2_HUMAN]                                       | 0.832 | 0.030 |
| Q674X7-3 | Isoform 3 of Kazrin OS=Homo sapiens GN=KAZN - [KAZRN_HUMAN]                                             | 0.836 | 0.047 |
| Q9UKL0   | REST corepressor 1 OS=Homo sapiens GN=RCOR1 PE=1 SV=1 - [RCOR1_HUMAN]                                   | 0.836 | 0.007 |
| Q14696   | LDLR chaperone MESD OS=Homo sapiens GN=MESDC2 PE=1 SV=2 - [MESD_HUMAN]                                  | 0.837 | 0.027 |
| Q01543-2 | Isoform 2 of Friend leukemia integration 1 transcription factor OS=Homo sapiens GN=FLI1 - [FLI1_HUMAN]  | 0.840 | 0.049 |
| Q16342   | Programmed cell death protein 2 OS=Homo sapiens GN=PDCD2 PE=1 SV=2 - [PDCD2_HUMAN]                      | 0.842 | 0.012 |
| Q9NZI7-4 | Isoform 2 of Upstream-binding protein 1 OS=Homo sapiens GN=UBP1 - [UBIP1_HUMAN]                         | 0.842 | 0.040 |
| Q8ND56   | Protein LSM14 homolog A OS=Homo sapiens GN=LSM14A PE=1 SV=3 - [LS14A_HUMAN]                             | 0.845 | 0.040 |
| Q96PK6   | RNA-binding protein 14 OS=Homo sapiens GN=RBM14 PE=1 SV=2 - [RBM14_HUMAN]                               | 0.845 | 0.011 |
| Q96RE7   | Nucleus accumbens-associated protein 1 OS=Homo sapiens GN=NACC1 PE=1 SV=1 - [NACC1_HUMAN]               | 0.847 | 0.041 |
| Q5SWX8-3 | Isoform 3 of Protein odr-4 homolog OS=Homo sapiens GN=ODR4 - [ODR4_HUMAN]                               | 0.848 | 0.007 |
| Q9NWM3   | CUE domain-containing protein 1 OS=Homo sapiens GN=CUEDC1 PE=1 SV=1 - [CUED1_HUMAN]                     | 0.849 | 0.044 |
| Q8WUW1   | Protein BRICK1 OS=Homo sapiens GN=BRK1 PE=1 SV=1 - [BRK1_HUMAN]                                         | 0.850 | 0.049 |

|          |                                                                                                                |       |       |
|----------|----------------------------------------------------------------------------------------------------------------|-------|-------|
| P15408-3 | Isoform 3 of Fos-related antigen 2 OS=Homo sapiens GN=FOSL2 - [FOSL2_HUMAN]                                    | 0.851 | 0.004 |
| Q96B26   | Exosome complex component RRP43 OS=Homo sapiens GN=EXOSC8 PE=1 SV=1 - [EXOSC8_HUMAN]                           | 0.852 | 0.021 |
| P46783   | 40S ribosomal protein S10 OS=Homo sapiens GN=RPS10 PE=1 SV=1 - [RPS10_HUMAN]                                   | 0.853 | 0.024 |
| Q9NX58   | Cell growth-regulating nucleolar protein OS=Homo sapiens GN=LYAR PE=1 SV=2 - [LYAR_HUMAN]                      | 0.854 | 0.038 |
| Q13490   | Baculoviral IAP repeat-containing protein 2 OS=Homo sapiens GN=BIRC2 PE=1 SV=2 - [BIRC2_HUMAN]                 | 0.855 | 0.039 |
| P51114   | Fragile X mental retardation syndrome-related protein 1 OS=Homo sapiens GN=FXR1 PE=1 SV=3 - [FXR1_HUMAN]       | 0.855 | 0.017 |
| Q9UBL3-2 | Isoform 2 of Set1/Ash2 histone methyltransferase complex subunit ASH2 OS=Homo sapiens GN=ASH2L - [ASH2L_HUMAN] | 0.856 | 0.034 |
| Q16543   | Hsp90 co-chaperone Cdc37 OS=Homo sapiens GN=CDC37 PE=1 SV=1 - [CDC37_HUMAN]                                    | 0.861 | 0.032 |
| Q9HBL0   | Tensin-1 OS=Homo sapiens GN=TNS1 PE=1 SV=2 - [TNS1_HUMAN]                                                      | 0.861 | 0.039 |
| P50750   | Cyclin-dependent kinase 9 OS=Homo sapiens GN=CDK9 PE=1 SV=3 - [CDK9_HUMAN]                                     | 0.862 | 0.013 |
| P61244-3 | Isoform 3 of Protein max OS=Homo sapiens GN=MAX - [MAX_HUMAN]                                                  | 0.862 | 0.034 |
| Q03111   | Protein ENL OS=Homo sapiens GN=MLLT1 PE=1 SV=2 - [ENL_HUMAN]                                                   | 0.862 | 0.048 |
| Q96CP2   | FLYWCH family member 2 OS=Homo sapiens GN=FLYWCH2 PE=1 SV=1 - [FWCH2_HUMAN]                                    | 0.863 | 0.033 |
| Q14161-2 | Isoform 2 of ARF GTPase-activating protein GIT2 OS=Homo sapiens GN=GIT2 - [GIT2_HUMAN]                         | 0.863 | 0.049 |
| Q12874   | Splicing factor 3A subunit 3 OS=Homo sapiens GN=SF3A3 PE=1 SV=1 - [SF3A3_HUMAN]                                | 0.863 | 0.032 |
| P00387-2 | Isoform 2 of NADH-cytochrome b5 reductase 3 OS=Homo sapiens GN=CYB5R3 - [NB5R3_HUMAN]                          | 0.864 | 0.011 |
| Q96PN7-2 | Isoform 2 of Transcriptional-regulating factor 1 OS=Homo sapiens GN=TRERF1 - [TREF1_HUMAN]                     | 0.868 | 0.037 |
| Q9BVM4   | Gamma-glutamylaminocyclotransferase OS=Homo sapiens GN=A2LD1 PE=1 SV=2 - [A2LD1_HUMAN]                         | 0.869 | 0.038 |
| O43913-2 | Isoform 2 of Origin recognition complex subunit 5 OS=Homo sapiens GN=ORC5 - [ORC5_HUMAN]                       | 0.870 | 0.040 |
| Q96GZ6-6 | Isoform 6 of Solute carrier family 41 member 3 OS=Homo sapiens GN=SLC41A3 - [S41A3_HUMAN]                      | 0.870 | 0.047 |
| O14818   | Proteasome subunit alpha type-7 OS=Homo sapiens GN=PSMA7 PE=1 SV=1 - [PSA7_HUMAN]                              | 0.873 | 0.038 |
| Q96DI7   | U5 small nuclear ribonucleoprotein 40 kDa protein OS=Homo sapiens GN=SNRNP40 PE=1 SV=1 - [SNR40_HUMAN]         | 0.874 | 0.035 |
| Q14393-3 | Isoform 3 of Growth arrest-specific protein 6 OS=Homo sapiens GN=GAS6 - [GAS6_HUMAN]                           | 0.875 | 0.040 |
| Q8N138-4 | Isoform 2 of ORM1-like protein 3 OS=Homo sapiens GN=ORMDL3 - [ORML3_HUMAN]                                     | 0.875 | 0.001 |
| Q9Y448   | Putative TRAF4-associated factor 1 OS=Homo sapiens GN=TRAF4AF1 PE=1 SV=2 - [T4AF1_HUMAN]                       | 0.876 | 0.009 |
| Q9UPT8   | Zinc finger CCCH domain-containing protein 4 OS=Homo sapiens GN=ZC3H4 PE=1 SV=3 - [ZC3H4_HUMAN]                | 0.878 | 0.035 |
| O14641   | Segment polarity protein dishevelled homolog DVL-2 OS=Homo sapiens GN=DVL2 PE=1 SV=1 - [DVL2_HUMAN]            | 0.880 | 0.049 |
| P08107   | Heat shock 70 kDa protein 1A/1B OS=Homo sapiens GN=HSPA1A PE=1 SV=5 - [HSP71_HUMAN]                            | 0.880 | 0.013 |
| O00567   | Nucleolar protein 56 OS=Homo sapiens GN=NOP56 PE=1 SV=4 - [NOP56_HUMAN]                                        | 0.881 | 0.025 |

|          |                                                                                                                     |       |       |
|----------|---------------------------------------------------------------------------------------------------------------------|-------|-------|
| Q00423   | Echinoderm microtubule-associated protein-like 1 OS=Homo sapiens GN=EML1 PE=1 SV=3 - [EMAL1_HUMAN]                  | 0.882 | 0.049 |
| Q9Y282   | Endoplasmic reticulum-Golgi intermediate compartment protein 3 OS=Homo sapiens GN=ERGIC3 PE=1 SV=1 - [ERGI3_HUMAN]  | 0.882 | 0.033 |
| Q5PRF9   | Protein Smaug homolog 2 OS=Homo sapiens GN=SAMD4B PE=1 SV=1 - [SMAG2_HUMAN]                                         | 0.883 | 0.034 |
| P02786   | Transferrin receptor protein 1 OS=Homo sapiens GN=TFRC PE=1 SV=2 - [TFR1_HUMAN]                                     | 0.884 | 0.045 |
| Q92845   | Kinesin-associated protein 3 OS=Homo sapiens GN=KIFAP3 PE=1 SV=2 - [KIFA3_HUMAN]                                    | 0.884 | 0.027 |
| P54652   | Heat shock-related 70 kDa protein 2 OS=Homo sapiens GN=HSPA2 PE=1 SV=1 - [HSP72_HUMAN]                              | 0.886 | 0.005 |
| Q13905-2 | Isoform Short of Rap guanine nucleotide exchange factor 1 OS=Homo sapiens GN=RAPGEF1 - [RPGF1_HUMAN]                | 0.887 | 0.042 |
| Q5T6V5   | UPF0553 protein C9orf64 OS=Homo sapiens GN=C9orf64 PE=1 SV=1 - [CI064_HUMAN]                                        | 0.887 | 0.007 |
| Q94992   | Protein HEXIM1 OS=Homo sapiens GN=HEXIM1 PE=1 SV=1 - [HEXI1_HUMAN]                                                  | 0.887 | 0.019 |
| P61916   | Epididymal secretory protein E1 OS=Homo sapiens GN=NPC2 PE=1 SV=1 - [NPC2_HUMAN]                                    | 0.892 | 0.020 |
| P25398   | 40S ribosomal protein S12 OS=Homo sapiens GN=RPS12 PE=1 SV=3 - [RS12_HUMAN]                                         | 0.892 | 0.028 |
| Q96ST2-2 | Isoform 2 of Protein IWS1 homolog OS=Homo sapiens GN=IWS1 - [IWS1_HUMAN]                                            | 0.893 | 0.042 |
| O43402   | Neighbor of COX4 OS=Homo sapiens GN=COX4NB PE=1 SV=1 - [CX4NB_HUMAN]                                                | 0.893 | 0.046 |
| Q9BV79-2 | Isoform 2 of Trans-2-enoyl-CoA reductase, mitochondrial OS=Homo sapiens GN=MECR - [MECR_HUMAN]                      | 0.893 | 0.020 |
| P26641   | Elongation factor 1-gamma OS=Homo sapiens GN=EEF1G PE=1 SV=3 - [EF1G_HUMAN]                                         | 0.894 | 0.016 |
| Q92615   | La-related protein 4B OS=Homo sapiens GN=LARP4B PE=1 SV=3 - [LAR4B_HUMAN]                                           | 0.894 | 0.048 |
| Q9P2K5-2 | Isoform 2 of Myelin expression factor 2 OS=Homo sapiens GN=MYEF2 - [MYEF2_HUMAN]                                    | 0.895 | 0.047 |
| Q9NVA1-2 | Isoform 2 of Ubiquinol-cytochrome c reductase complex chaperone CBP3 homolog OS=Homo sapiens GN=UQCC - [UQCC_HUMAN] | 0.895 | 0.044 |
| Q9H490-2 | Isoform 2 of Phosphatidylinositol glycan anchor biosynthesis class U protein OS=Homo sapiens GN=PIGU - [PIGU_HUMAN] | 0.896 | 0.031 |
| Q9NVC6   | Mediator of RNA polymerase II transcription subunit 17 OS=Homo sapiens GN=MED17 PE=1 SV=2 - [MED17_HUMAN]           | 0.896 | 0.046 |
| P22626   | Heterogeneous nuclear ribonucleoproteins A2/B1 OS=Homo sapiens GN=HNRNPA2B1 PE=1 SV=2 - [ROA2_HUMAN]                | 0.896 | 0.010 |
| P62937   | Peptidyl-prolyl cis-trans isomerase A OS=Homo sapiens GN=PPIA PE=1 SV=2 - [PPIA_HUMAN]                              | 0.897 | 0.019 |
| Q5HYK3   | 2-methoxy-6-polyprenyl-1,4-benzoquinol methylase, mitochondrial OS=Homo sapiens GN=COQ5 PE=1 SV=2 - [COQ5_HUMAN]    | 0.897 | 0.027 |
| Q9Y2D5-6 | Isoform 4 of A-kinase anchor protein 2 OS=Homo sapiens GN=AKAP2 - [AKAP2_HUMAN]                                     | 0.897 | 0.046 |
| Q9NSV4   | Protein diaphanous homolog 3 OS=Homo sapiens GN=DIAPH3 PE=1 SV=4 - [DIAP3_HUMAN]                                    | 0.901 | 0.048 |
| Q13976   | cGMP-dependent protein kinase 1 OS=Homo sapiens GN=PRKG1 PE=1 SV=3 - [KGP1_HUMAN]                                   | 0.902 | 0.026 |
| P30046   | D-dopachrome decarboxylase OS=Homo sapiens GN=DDT PE=1 SV=3 - [DOPD_HUMAN]                                          | 0.903 | 0.019 |
| P51151   | Ras-related protein Rab-9A OS=Homo sapiens GN=RAB9A PE=1 SV=1 - [RAB9A_HUMAN]                                       | 0.905 | 0.002 |
| Q92581-2 | Isoform 2 of Sodium/hydrogen exchanger 6 OS=Homo sapiens GN=SLC9A6 - [SL9A6_HUMAN]                                  | 0.906 | 0.039 |

|          |                                                                                                                       |       |       |
|----------|-----------------------------------------------------------------------------------------------------------------------|-------|-------|
| P08754   | Guanine nucleotide-binding protein G(k) subunit alpha OS=Homo sapiens GN=GNAI3 PE=1 SV=3 - [GNAI3_HUMAN]              | 0.906 | 0.043 |
| Q14061   | Cytochrome c oxidase copper chaperone OS=Homo sapiens GN=COX17 PE=1 SV=2 - [COX17_HUMAN]                              | 0.907 | 0.012 |
| P09012   | U1 small nuclear ribonucleoprotein A OS=Homo sapiens GN=SNRPA PE=1 SV=3 - [SNRPA_HUMAN]                               | 0.907 | 0.026 |
| P18621   | 60S ribosomal protein L17 OS=Homo sapiens GN=RPL17 PE=1 SV=3 - [RPL17_HUMAN]                                          | 0.909 | 0.018 |
| O14908   | PDZ domain-containing protein GIPC1 OS=Homo sapiens GN=GIPC1 PE=1 SV=2 - [GIPC1_HUMAN]                                | 0.909 | 0.044 |
| P54727   | UV excision repair protein RAD23 homolog B OS=Homo sapiens GN=RAD23B PE=1 SV=1 - [RAD23B_HUMAN]                       | 0.911 | 0.035 |
| Q9Y3F4   | Serine-threonine kinase receptor-associated protein OS=Homo sapiens GN=STRAP PE=1 SV=1 - [STRAP_HUMAN]                | 0.911 | 0.034 |
| P07237   | Protein disulfide-isomerase OS=Homo sapiens GN=P4HB PE=1 SV=3 - [PDIA1_HUMAN]                                         | 0.912 | 0.010 |
| Q5H9R7-3 | Isoform 3 of Serine/threonine-protein phosphatase 6 regulatory subunit 3 OS=Homo sapiens GN=PPP6R3 - [PPP6R3_HUMAN]   | 0.912 | 0.038 |
| P11279   | Lysosome-associated membrane glycoprotein 1 OS=Homo sapiens GN=LAMP1 PE=1 SV=3 - [LAMP1_HUMAN]                        | 0.914 | 0.008 |
| O15042-2 | Isoform 2 of U2 snRNP-associated SURP motif-containing protein OS=Homo sapiens GN=U2SURP - [SR140_HUMAN]              | 0.915 | 0.042 |
| Q2NKX8   | DNA excision repair protein ERCC-6-like OS=Homo sapiens GN=ERCC6L PE=1 SV=1 - [ERC6L_HUMAN]                           | 0.915 | 0.044 |
| Q13443   | Disintegrin and metalloproteinase domain-containing protein 9 OS=Homo sapiens GN=ADAM9 PE=1 SV=1 - [ADAM9_HUMAN]      | 0.916 | 0.015 |
| Q9ULR0   | Pre-mRNA-splicing factor ISY1 homolog OS=Homo sapiens GN=ISY1 PE=1 SV=3 - [ISY1_HUMAN]                                | 0.916 | 0.020 |
| Q14680   | Maternal embryonic leucine zipper kinase OS=Homo sapiens GN=MELK PE=1 SV=3 - [MELK_HUMAN]                             | 0.918 | 0.000 |
| Q9NVP1   | ATP-dependent RNA helicase DDX18 OS=Homo sapiens GN=DDX18 PE=1 SV=2 - [DDX18_HUMAN]                                   | 0.918 | 0.041 |
| Q9NXW2   | DnaJ homolog subfamily B member 12 OS=Homo sapiens GN=DNAJB12 PE=1 SV=4 - [DJB12_HUMAN]                               | 0.919 | 0.023 |
| Q8N3Z3-3 | Isoform 3 of GTP-binding protein 8 OS=Homo sapiens GN=GTPBP8 - [GTPBP8_HUMAN]                                         | 0.920 | 0.024 |
| P36551   | Coproporphyrinogen-III oxidase, mitochondrial OS=Homo sapiens GN=CPOX PE=1 SV=3 - [HEM6_HUMAN]                        | 0.920 | 0.043 |
| P08397-2 | Isoform 2 of Porphobilinogen deaminase OS=Homo sapiens GN=HMBS - [HEM3_HUMAN]                                         | 0.920 | 0.048 |
| Q14C86-2 | Isoform 2 of GTPase-activating protein and VPS9 domain-containing protein 1 OS=Homo sapiens GN=GAPVD1 - [GAPD1_HUMAN] | 0.921 | 0.033 |
| Q9BW62   | Katanin p60 ATPase-containing subunit A-like 1 OS=Homo sapiens GN=KATNAL1 PE=2 SV=1 - [KATL1_HUMAN]                   | 0.921 | 0.037 |
| Q86UP2   | Kinectin OS=Homo sapiens GN=KTN1 PE=1 SV=1 - [KTN1_HUMAN]                                                             | 0.922 | 0.039 |
| A6NDG6   | Phosphoglycolate phosphatase OS=Homo sapiens GN=PGP PE=1 SV=1 - [PGP_HUMAN]                                           | 0.923 | 0.004 |
| O43719   | HIV Tat-specific factor 1 OS=Homo sapiens GN=HTATSF1 PE=1 SV=1 - [HTSF1_HUMAN]                                        | 0.924 | 0.033 |
| P17844   | Probable ATP-dependent RNA helicase DDX5 OS=Homo sapiens GN=DDX5 PE=1 SV=1 - [DDX5_HUMAN]                             | 0.925 | 0.025 |
| Q71RC2-3 | Isoform 3 of La-related protein 4 OS=Homo sapiens GN=LARP4 - [LARP4_HUMAN]                                            | 0.926 | 0.020 |
| Q8IV38   | Ankyrin repeat and MYND domain-containing protein 2 OS=Homo sapiens GN=ANKMY2 PE=1 SV=1 - [ANKY2_HUMAN]               | 0.928 | 0.049 |
| Q13564   | NEDD8-activating enzyme E1 regulatory subunit OS=Homo sapiens GN=NAE1 PE=1 SV=1 - [ULA1_HUMAN]                        | 0.929 | 0.010 |

|          |                                                                                                                    |       |       |
|----------|--------------------------------------------------------------------------------------------------------------------|-------|-------|
| Q8NBX0   | Saccharopine dehydrogenase-like oxidoreductase OS=Homo sapiens GN=SCCPDH PE=1 SV=1 - [SCPDH_HUMAN]                 | 0.929 | 0.024 |
| Q93050-1 | Isoform 2 of V-type proton ATPase 116 kDa subunit a isoform 1 OS=Homo sapiens GN=ATP6V0A1 - [VPP1_HUMAN]           | 0.929 | 0.008 |
| Q92930   | Ras-related protein Rab-8B OS=Homo sapiens GN=RAB8B PE=1 SV=2 - [RAB8B_HUMAN]                                      | 0.930 | 0.031 |
| Q9BQG0   | Myb-binding protein 1A OS=Homo sapiens GN=MYBBP1A PE=1 SV=2 - [MBB1A_HUMAN]                                        | 0.930 | 0.047 |
| P14625   | Endoplasmic reticulum chaperone protein OS=Homo sapiens GN=HSP90B1 PE=1 SV=1 - [ENPL_HUMAN]                        | 0.931 | 0.037 |
| Q9Y266   | Nuclear migration protein nudC OS=Homo sapiens GN=NUDC PE=1 SV=1 - [NUDC_HUMAN]                                    | 0.932 | 0.047 |
| Q92966   | snRNA-activating protein complex subunit 3 OS=Homo sapiens GN=SNAPC3 PE=1 SV=1 - [SNPC3_HUMAN]                     | 0.932 | 0.037 |
| Q9UGP8   | Translocation protein SEC63 homolog OS=Homo sapiens GN=SEC63 PE=1 SV=2 - [SEC63_HUMAN]                             | 0.933 | 0.017 |
| Q7L523   | Ras-related GTP-binding protein A OS=Homo sapiens GN=RRAGA PE=1 SV=1 - [RRAGA_HUMAN]                               | 0.933 | 0.028 |
| Q5JSH3-2 | Isoform 2 of WD repeat-containing protein 44 OS=Homo sapiens GN=WDR44 - [WDR44_HUMAN]                              | 0.935 | 0.023 |
| Q63HQ0   | AP-1 complex-associated regulatory protein OS=Homo sapiens GN=AP1AR PE=1 SV=1 - [AP1AR_HUMAN]                      | 0.938 | 0.013 |
| Q7Z6E9   | E3 ubiquitin-protein ligase RBBP6 OS=Homo sapiens GN=RBBP6 PE=1 SV=1 - [RBBP6_HUMAN]                               | 0.939 | 0.043 |
| O60346   | PH domain leucine-rich repeat-containing protein phosphatase 1 OS=Homo sapiens GN=PHLPP1 PE=1 SV=3 - [PHLP1_HUMAN] | 0.940 | 0.035 |
| P61923   | Coatamer subunit zeta-1 OS=Homo sapiens GN=COPZ1 PE=1 SV=1 - [COPZ1_HUMAN]                                         | 0.941 | 0.044 |
| P08758   | Annexin A5 OS=Homo sapiens GN=ANXA5 PE=1 SV=2 - [ANXA5_HUMAN]                                                      | 0.941 | 0.048 |
| Q93009   | Ubiquitin carboxyl-terminal hydrolase 7 OS=Homo sapiens GN=USP7 PE=1 SV=2 - [UBP7_HUMAN]                           | 0.942 | 0.008 |
| Q96TC7   | Regulator of microtubule dynamics protein 3 OS=Homo sapiens GN=FAM82A2 PE=1 SV=2 - [RMD3_HUMAN]                    | 0.942 | 0.035 |
| P49662   | Caspase-4 OS=Homo sapiens GN=CASP4 PE=1 SV=1 - [CASP4_HUMAN]                                                       | 0.945 | 0.040 |
| Q06323   | Proteasome activator complex subunit 1 OS=Homo sapiens GN=PSME1 PE=1 SV=1 - [PSME1_HUMAN]                          | 0.945 | 0.039 |
| O15305   | Phosphomannomutase 2 OS=Homo sapiens GN=PMM2 PE=1 SV=1 - [PMM2_HUMAN]                                              | 0.945 | 0.028 |
| P46821   | Microtubule-associated protein 1B OS=Homo sapiens GN=MAP1B PE=1 SV=2 - [MAP1B_HUMAN]                               | 0.946 | 0.017 |
| Q9P2W9   | Syntaxin-18 OS=Homo sapiens GN=STX18 PE=1 SV=1 - [STX18_HUMAN]                                                     | 0.946 | 0.009 |
| Q92685   | Dol-P-Man:Man(5)GlcNAc(2)-PP-Dol alpha-1,3-mannosyltransferase OS=Homo sapiens GN=ALG3 PE=1 SV=1 - [ALG3_HUMAN]    | 0.946 | 0.029 |
| Q0VDG4   | Secernin-3 OS=Homo sapiens GN=SCRN3 PE=1 SV=1 - [SCRN3_HUMAN]                                                      | 0.948 | 0.043 |
| P09651   | Heterogeneous nuclear ribonucleoprotein A1 OS=Homo sapiens GN=HNRNPA1 PE=1 SV=5 - [ROA1_HUMAN]                     | 0.948 | 0.037 |
| P18206-2 | Isoform 1 of Vinculin OS=Homo sapiens GN=VCL - [VINC_HUMAN]                                                        | 0.949 | 0.050 |
| P43034   | Platelet-activating factor acetylhydrolase 1B subunit alpha OS=Homo sapiens GN=PAFAH1B1 PE=1 SV=2 - [LIS1_HUMAN]   | 0.949 | 0.020 |
| Q13459-2 | Isoform Short of Myosin-IXb OS=Homo sapiens GN=MYO9B - [MYO9B_HUMAN]                                               | 0.950 | 0.010 |
| O00151   | PDZ and LIM domain protein 1 OS=Homo sapiens GN=PDLIM1 PE=1 SV=4 - [PDL1_HUMAN]                                    | 0.950 | 0.029 |

|          |                                                                                                                     |       |       |
|----------|---------------------------------------------------------------------------------------------------------------------|-------|-------|
| O94760   | N(G),N(G)-dimethylarginine dimethylaminohydrolase 1 OS=Homo sapiens GN=DDAH1 PE=1 SV=3 - [DDAH1_HUMAN]              | 0.950 | 0.042 |
| Q99653   | Calcium-binding protein p22 OS=Homo sapiens GN=CHP PE=1 SV=3 - [CHP1_HUMAN]                                         | 0.952 | 0.045 |
| O75396   | Vesicle-trafficking protein SEC22b OS=Homo sapiens GN=SEC22B PE=1 SV=4 - [SC22B_HUMAN]                              | 0.952 | 0.042 |
| P39023   | 60S ribosomal protein L3 OS=Homo sapiens GN=RPL3 PE=1 SV=2 - [RL3_HUMAN]                                            | 0.953 | 0.046 |
| P13797   | Plastin-3 OS=Homo sapiens GN=PLS3 PE=1 SV=4 - [PLST_HUMAN]                                                          | 0.953 | 0.026 |
| P13639   | Elongation factor 2 OS=Homo sapiens GN=EEF2 PE=1 SV=4 - [EF2_HUMAN]                                                 | 0.953 | 0.046 |
| Q99848   | Probable rRNA-processing protein EBP2 OS=Homo sapiens GN=EBNA1BP2 PE=1 SV=2 - [EBP2_HUMAN]                          | 0.953 | 0.035 |
| Q9P265   | Disco-interacting protein 2 homolog B OS=Homo sapiens GN=DIP2B PE=1 SV=3 - [DIP2B_HUMAN]                            | 0.954 | 0.003 |
| Q00341   | Vigilin OS=Homo sapiens GN=HDLBP PE=1 SV=2 - [VIGLN_HUMAN]                                                          | 0.955 | 0.023 |
| Q70UQ0-4 | Isoform 4 of Inhibitor of nuclear factor kappa-B kinase-interacting protein OS=Homo sapiens GN=IKBIP - [IKIP_HUMAN] | 0.958 | 0.018 |
| P62195   | 26S protease regulatory subunit 8 OS=Homo sapiens GN=PSMC5 PE=1 SV=1 - [PRS8_HUMAN]                                 | 0.960 | 0.031 |
| Q9Y4W6   | AFG3-like protein 2 OS=Homo sapiens GN=AFG3L2 PE=1 SV=2 - [AFG32_HUMAN]                                             | 0.961 | 0.023 |
| P11413   | Glucose-6-phosphate 1-dehydrogenase OS=Homo sapiens GN=G6PD PE=1 SV=4 - [G6PD_HUMAN]                                | 0.961 | 0.011 |
| Q14677   | Clathrin interactor 1 OS=Homo sapiens GN=CLINT1 PE=1 SV=1 - [EPN4_HUMAN]                                            | 0.964 | 0.014 |
| P28340   | DNA polymerase delta catalytic subunit OS=Homo sapiens GN=POLD1 PE=1 SV=2 - [DPOD1_HUMAN]                           | 0.977 | 0.040 |
| P62258   | 14-3-3 protein epsilon OS=Homo sapiens GN=YWHAE PE=1 SV=1 - [1433E_HUMAN]                                           | 0.979 | 0.032 |
| Q86W56-2 | Isoform 2 of Poly(ADP-ribose) glycohydrolase OS=Homo sapiens GN=PARG - [PARG_HUMAN]                                 | 1.015 | 0.041 |
| O43491   | Band 4.1-like protein 2 OS=Homo sapiens GN=EPB41L2 PE=1 SV=1 - [E41L2_HUMAN]                                        | 1.025 | 0.046 |
| Q7KZ85   | Transcription elongation factor SPT6 OS=Homo sapiens GN=SUPT6H PE=1 SV=2 - [SPT6H_HUMAN]                            | 1.029 | 0.040 |
| Q9Y262   | Eukaryotic translation initiation factor 3 subunit L OS=Homo sapiens GN=EIF3L PE=1 SV=1 - [EIF3L_HUMAN]             | 1.030 | 0.014 |
| Q86UV5-2 | Isoform 2 of Ubiquitin carboxyl-terminal hydrolase 48 OS=Homo sapiens GN=USP48 - [UBP48_HUMAN]                      | 1.030 | 0.025 |
| Q14669   | Probable E3 ubiquitin-protein ligase TRIP12 OS=Homo sapiens GN=TRIP12 PE=1 SV=1 - [TRIPC_HUMAN]                     | 1.031 | 0.047 |
| Q96AE4   | Far upstream element-binding protein 1 OS=Homo sapiens GN=FUBP1 PE=1 SV=3 - [FUBP1_HUMAN]                           | 1.031 | 0.015 |
| O43617   | Trafficking protein particle complex subunit 3 OS=Homo sapiens GN=TRAPPC3 PE=1 SV=1 - [TPPC3_HUMAN]                 | 1.042 | 0.045 |
| Q5VIR6-4 | Isoform 4 of Vacuolar protein sorting-associated protein 53 homolog OS=Homo sapiens GN=VPS53 - [VPS53_HUMAN]        | 1.042 | 0.020 |
| Q3L8U1-2 | Isoform 2 of Chromodomain-helicase-DNA-binding protein 9 OS=Homo sapiens GN=CHD9 - [CHD9_HUMAN]                     | 1.042 | 0.036 |
| P16435   | NADPH--cytochrome P450 reductase OS=Homo sapiens GN=POR PE=1 SV=2 - [NCPR_HUMAN]                                    | 1.044 | 0.011 |
| P68366   | Tubulin alpha-4A chain OS=Homo sapiens GN=TUBA4A PE=1 SV=1 - [TBA4A_HUMAN]                                          | 1.053 | 0.034 |
| Q9H0R6   | Glutamyl-tRNA(Gln) amidotransferase subunit A, mitochondrial OS=Homo sapiens GN=QRSL1 PE=1 SV=2 - [GATA_HUMAN]      | 1.054 | 0.024 |

|          |                                                                                                                          |       |       |
|----------|--------------------------------------------------------------------------------------------------------------------------|-------|-------|
| P17987   | T-complex protein 1 subunit alpha OS=Homo sapiens GN=TCP1 PE=1 SV=1 - [TCPA_HUMAN]                                       | 1.057 | 0.004 |
| Q0IIM8-2 | Isoform 2 of TBC1 domain family member 8B OS=Homo sapiens GN=TBC1D8B - [TBC8B_HUMAN]                                     | 1.058 | 0.021 |
| Q01970   | 1-phosphatidylinositol-4,5-bisphosphate phosphodiesterase beta-3 OS=Homo sapiens GN=PLCB3 PE=1 SV=2 - [PLCB3_HUMAN]      | 1.061 | 0.028 |
| Q9BW60   | Elongation of very long chain fatty acids protein 1 OS=Homo sapiens GN=ELOVL1 PE=1 SV=1 - [ELOV1_HUMAN]                  | 1.061 | 0.013 |
| Q5JVF3-3 | Isoform 3 of PCI domain-containing protein 2 OS=Homo sapiens GN=PCID2 - [PCID2_HUMAN]                                    | 1.065 | 0.009 |
| Q13596-2 | Isoform 1A of Sorting nexin-1 OS=Homo sapiens GN=SNX1 - [SNX1_HUMAN]                                                     | 1.065 | 0.040 |
| Q6P2E9   | Enhancer of mRNA-decapping protein 4 OS=Homo sapiens GN=EDC4 PE=1 SV=1 - [EDC4_HUMAN]                                    | 1.065 | 0.028 |
| P51003   | Poly(A) polymerase alpha OS=Homo sapiens GN=PAPOLA PE=1 SV=4 - [PAPOA_HUMAN]                                             | 1.068 | 0.020 |
| Q99661-2 | Isoform 2 of Kinesin-like protein KIF2C OS=Homo sapiens GN=KIF2C - [KIF2C_HUMAN]                                         | 1.068 | 0.035 |
| P23258   | Tubulin gamma-1 chain OS=Homo sapiens GN=TUBG1 PE=1 SV=2 - [TBG1_HUMAN]                                                  | 1.068 | 0.029 |
| Q93008-1 | Isoform 2 of Probable ubiquitin carboxyl-terminal hydrolase FAF-X OS=Homo sapiens GN=USP9X - [USP9X_HUMAN]               | 1.069 | 0.039 |
| Q92896   | Golgi apparatus protein 1 OS=Homo sapiens GN=GLG1 PE=1 SV=2 - [GSLG1_HUMAN]                                              | 1.069 | 0.047 |
| Q96GM8   | Target of EGR1 protein 1 OS=Homo sapiens GN=TOE1 PE=1 SV=1 - [TOE1_HUMAN]                                                | 1.069 | 0.040 |
| P45880-2 | Isoform 2 of Voltage-dependent anion-selective channel protein 2 OS=Homo sapiens GN=VDAC2 - [VDAC2_HUMAN]                | 1.071 | 0.029 |
| O15031   | Plexin-B2 OS=Homo sapiens GN=PLXNB2 PE=1 SV=3 - [PLXB2_HUMAN]                                                            | 1.071 | 0.024 |
| Q147X3   | N-alpha-acetyltransferase 30 OS=Homo sapiens GN=NAA30 PE=1 SV=1 - [NAA30_HUMAN]                                          | 1.073 | 0.049 |
| O75879   | Glutamyl-tRNA(Gln) amidotransferase subunit B, mitochondrial OS=Homo sapiens GN=PET112 PE=1 SV=1 - [GATB_HUMAN]          | 1.073 | 0.049 |
| Q9NY61   | Protein AATF OS=Homo sapiens GN=AATF PE=1 SV=1 - [AATF_HUMAN]                                                            | 1.074 | 0.021 |
| Q9ULW0   | Targeting protein for Xklp2 OS=Homo sapiens GN=TPX2 PE=1 SV=2 - [TPX2_HUMAN]                                             | 1.074 | 0.046 |
| Q92734   | Protein TFG OS=Homo sapiens GN=TFG PE=1 SV=2 - [TFG_HUMAN]                                                               | 1.077 | 0.014 |
| Q96H20-2 | Isoform 2 of Vacuolar-sorting protein SNF8 OS=Homo sapiens GN=SNF8 - [SNF8_HUMAN]                                        | 1.082 | 0.032 |
| Q9BW19   | Kinesin-like protein KIFC1 OS=Homo sapiens GN=KIFC1 PE=1 SV=2 - [KIFC1_HUMAN]                                            | 1.085 | 0.007 |
| P62136   | Serine/threonine-protein phosphatase PP1-alpha catalytic subunit OS=Homo sapiens GN=PPP1CA PE=1 SV=1 - [PP1A_HUMAN]      | 1.085 | 0.038 |
| Q5MIZ7-3 | Isoform 3 of Serine/threonine-protein phosphatase 4 regulatory subunit 3B OS=Homo sapiens GN=SMEK2 - [P4R3B_HUMAN]       | 1.090 | 0.004 |
| Q96CW6   | Probable RNA polymerase II nuclear localization protein SLC7A6OS OS=Homo sapiens GN=SLC7A6OS PE=1 SV=2 - [S7A6O_HUMAN]   | 1.091 | 0.005 |
| Q9UMY1-2 | Isoform 2 of Nucleolar protein 7 OS=Homo sapiens GN=NOL7 - [NOL7_HUMAN]                                                  | 1.092 | 0.042 |
| Q13155   | Aminoacyl tRNA synthase complex-interacting multifunctional protein 2 OS=Homo sapiens GN=AIMP2 PE=1 SV=2 - [AIMP2_HUMAN] | 1.093 | 0.044 |
| Q96BJ3   | Axin interactor, dorsalization-associated protein OS=Homo sapiens GN=AIDA PE=1 SV=1 - [AIDA_HUMAN]                       | 1.093 | 0.021 |
| O95163   | Elongator complex protein 1 OS=Homo sapiens GN=IKBKAP PE=1 SV=3 - [ELP1_HUMAN]                                           | 1.095 | 0.044 |

|          |                                                                                                        |       |       |
|----------|--------------------------------------------------------------------------------------------------------|-------|-------|
| Q9UGV2-3 | Isoform 3 of Protein NDRG3 OS=Homo sapiens GN=NDRG3 - [NDRG3_HUMAN]                                    | 1.095 | 0.003 |
| Q9Y4E5-2 | Isoform 2 of Zinc finger protein 451 OS=Homo sapiens GN=ZNF451 - [ZN451_HUMAN]                         | 1.097 | 0.017 |
| Q6SJ93   | Protein FAM111B OS=Homo sapiens GN=FAM111B PE=2 SV=1 - [F111B_HUMAN]                                   | 1.101 | 0.018 |
| P50148   | Guanine nucleotide-binding protein G(q) subunit alpha OS=Homo sapiens GN=GNAQ PE=1 SV=4 - [GNAQ_HUMAN] | 1.102 | 0.006 |
| Q15006   | Tetratricopeptide repeat protein 35 OS=Homo sapiens GN=TTC35 PE=1 SV=1 - [TTC35_HUMAN]                 | 1.105 | 0.006 |
| Q5JTD0-2 | Isoform 2 of Tight junction-associated protein 1 OS=Homo sapiens GN=TJAP1 - [TJAP1_HUMAN]              | 1.105 | 0.040 |
| P61457   | Pterin-4-alpha-carbinolamine dehydratase OS=Homo sapiens GN=PCBD1 PE=1 SV=2 - [PHS_HUMAN]              | 1.106 | 0.016 |
| Q6IPX3   | Transcription elongation factor A protein-like 6 OS=Homo sapiens GN=TCEAL6 PE=1 SV=1 - [TCAL6_HUMAN]   | 1.107 | 0.046 |
| Q6IA86-4 | Isoform 4 of Elongator complex protein 2 OS=Homo sapiens GN=ELP2 - [ELP2_HUMAN]                        | 1.110 | 0.017 |
| P12111-2 | Isoform 2 of Collagen alpha-3(VI) chain OS=Homo sapiens GN=COL6A3 - [CO6A3_HUMAN]                      | 1.111 | 0.009 |
| Q9H8V3-2 | Isoform 2 of Protein ECT2 OS=Homo sapiens GN=ECT2 - [ECT2_HUMAN]                                       | 1.111 | 0.034 |
| P49641-1 | Isoform 1 of Alpha-mannosidase 2x OS=Homo sapiens GN=MAN2A2 - [MA2A2_HUMAN]                            | 1.111 | 0.049 |
| Q32P28   | Prolyl 3-hydroxylase 1 OS=Homo sapiens GN=LEPRE1 PE=1 SV=2 - [P3H1_HUMAN]                              | 1.112 | 0.036 |
| Q9NRR5   | Ubiquilin-4 OS=Homo sapiens GN=UBQLN4 PE=1 SV=2 - [UBQL4_HUMAN]                                        | 1.115 | 0.010 |
| Q9UN37   | Vacuolar protein sorting-associated protein 4A OS=Homo sapiens GN=VPS4A PE=1 SV=1 - [VPS4A_HUMAN]      | 1.116 | 0.020 |
| O95864-3 | Isoform 3 of Fatty acid desaturase 2 OS=Homo sapiens GN=FADS2 - [FADS2_HUMAN]                          | 1.118 | 0.042 |
| P0DJ07   | Uncharacterized protein C19orf79 OS=Homo sapiens GN=C19orf79 PE=4 SV=1 - [CS079_HUMAN]                 | 1.120 | 0.001 |
| Q6NUQ1   | RAD50-interacting protein 1 OS=Homo sapiens GN=RINT1 PE=1 SV=1 - [RINT1_HUMAN]                         | 1.122 | 0.043 |
| P21399   | Cytoplasmic aconitate hydratase OS=Homo sapiens GN=ACO1 PE=1 SV=3 - [ACOC_HUMAN]                       | 1.123 | 0.008 |
| Q8WYP3   | Ras and Rab interactor 2 OS=Homo sapiens GN=RIN2 PE=1 SV=1 - [RIN2_HUMAN]                              | 1.125 | 0.030 |
| Q8TAF3-4 | Isoform 4 of WD repeat-containing protein 48 OS=Homo sapiens GN=WDR48 - [WDR48_HUMAN]                  | 1.126 | 0.035 |
| P57678   | Gem-associated protein 4 OS=Homo sapiens GN=GEMIN4 PE=1 SV=2 - [GEMI4_HUMAN]                           | 1.126 | 0.027 |
| Q9Y614   | Ubiquitin carboxyl-terminal hydrolase 3 OS=Homo sapiens GN=USP3 PE=1 SV=2 - [UBP3_HUMAN]               | 1.127 | 0.036 |
| Q8IX04   | Ubiquitin-conjugating enzyme E2 variant 3 OS=Homo sapiens GN=UEVLD PE=1 SV=2 - [UEVLD_HUMAN]           | 1.127 | 0.027 |
| Q9BY32   | Inosine triphosphate pyrophosphatase OS=Homo sapiens GN=ITPA PE=1 SV=2 - [ITPA_HUMAN]                  | 1.129 | 0.016 |
| O95391   | Pre-mRNA-splicing factor SLU7 OS=Homo sapiens GN=SLU7 PE=1 SV=2 - [SLU7_HUMAN]                         | 1.129 | 0.045 |
| Q9BYT8   | Neurolysin, mitochondrial OS=Homo sapiens GN=NLN PE=1 SV=1 - [NEUL_HUMAN]                              | 1.130 | 0.017 |
| P18887   | DNA repair protein XRCC1 OS=Homo sapiens GN=XRCC1 PE=1 SV=2 - [XRCC1_HUMAN]                            | 1.130 | 0.032 |
| P31930   | Cytochrome b-c1 complex subunit 1, mitochondrial OS=Homo sapiens GN=UQCRC1 PE=1 SV=3 - [QCR1_HUMAN]    | 1.130 | 0.034 |



|          |                                                                                                                               |       |       |
|----------|-------------------------------------------------------------------------------------------------------------------------------|-------|-------|
| P28290   | Sperm-specific antigen 2 OS=Homo sapiens GN=SSFA2 PE=1 SV=3 - [SSFA2_HUMAN]                                                   | 1.131 | 0.014 |
| Q9UPP1-3 | Isoform 3 of Histone lysine demethylase PHF8 OS=Homo sapiens GN=PHF8 - [PHF8_HUMAN]                                           | 1.132 | 0.043 |
| Q8WWN8   | Arf-GAP with Rho-GAP domain, ANK repeat and PH domain-containing protein 3 OS=Homo sapiens GN=ARAP3 PE=1 SV=1 - [ARAP3_HUMAN] | 1.132 | 0.003 |
| O94855   | Protein transport protein Sec24D OS=Homo sapiens GN=SEC24D PE=1 SV=2 - [SC24D_HUMAN]                                          | 1.132 | 0.042 |
| O00743   | Serine/threonine-protein phosphatase 6 catalytic subunit OS=Homo sapiens GN=PPP6C PE=1 SV=1 - [PPP6_HUMAN]                    | 1.134 | 0.017 |
| O60869-2 | Isoform 2 of Endothelial differentiation-related factor 1 OS=Homo sapiens GN=EDF1 - [EDF1_HUMAN]                              | 1.135 | 0.048 |
| Q9NZW5   | MAGUK p55 subfamily member 6 OS=Homo sapiens GN=MPP6 PE=1 SV=2 - [MPP6_HUMAN]                                                 | 1.136 | 0.014 |
| O95983-2 | Isoform 2 of Methyl-CpG-binding domain protein 3 OS=Homo sapiens GN=MBD3 - [MBD3_HUMAN]                                       | 1.137 | 0.026 |
| P21266   | Glutathione S-transferase Mu 3 OS=Homo sapiens GN=GSTM3 PE=1 SV=3 - [GSTM3_HUMAN]                                             | 1.139 | 0.037 |
| Q658Y4   | Protein FAM91A1 OS=Homo sapiens GN=FAM91A1 PE=1 SV=3 - [F91A1_HUMAN]                                                          | 1.141 | 0.033 |
| Q9P270   | SLAIN motif-containing protein 2 OS=Homo sapiens GN=SLAIN2 PE=1 SV=2 - [SLAI2_HUMAN]                                          | 1.147 | 0.002 |
| Q8TDY2-2 | Isoform 2 of RB1-inducible coiled-coil protein 1 OS=Homo sapiens GN=RB1CC1 - [RBCC1_HUMAN]                                    | 1.149 | 0.025 |
| Q05048   | Cleavage stimulation factor subunit 1 OS=Homo sapiens GN=CSTF1 PE=1 SV=1 - [CSTF1_HUMAN]                                      | 1.154 | 0.013 |
| Q9Y697-2 | Isoform Cytoplasmic of Cysteine desulfurase, mitochondrial OS=Homo sapiens GN=NFS1 - [NFS1_HUMAN]                             | 1.155 | 0.026 |
| Q96I23   | Protein preY, mitochondrial OS=Homo sapiens GN=PREY PE=1 SV=1 - [PREY_HUMAN]                                                  | 1.155 | 0.005 |
| Q04721   | Neurogenic locus notch homolog protein 2 OS=Homo sapiens GN=NOTCH2 PE=1 SV=3 - [NOTC2_HUMAN]                                  | 1.156 | 0.008 |
| O75947   | ATP synthase subunit d, mitochondrial OS=Homo sapiens GN=ATP5H PE=1 SV=3 - [ATP5H_HUMAN]                                      | 1.156 | 0.011 |
| Q96CG8   | Collagen triple helix repeat-containing protein 1 OS=Homo sapiens GN=CTHRC1 PE=1 SV=1 - [CTHR1_HUMAN]                         | 1.159 | 0.041 |
| P11177-2 | Isoform 2 of Pyruvate dehydrogenase E1 component subunit beta, mitochondrial OS=Homo sapiens GN=PDHB - [ODPB_HUMAN]           | 1.160 | 0.002 |
| Q07864   | DNA polymerase epsilon catalytic subunit A OS=Homo sapiens GN=POLE PE=1 SV=5 - [DPOE1_HUMAN]                                  | 1.162 | 0.008 |
| Q9H5V9   | UPF0428 protein CXorf56 OS=Homo sapiens GN=CXorf56 PE=1 SV=1 - [CX056_HUMAN]                                                  | 1.162 | 0.046 |
| Q9UKA9   | Polypyrimidine tract-binding protein 2 OS=Homo sapiens GN=PTBP2 PE=1 SV=1 - [PTBP2_HUMAN]                                     | 1.163 | 0.004 |
| Q8NHG7   | Small VCP/p97-interacting protein OS=Homo sapiens GN=SVIP PE=2 SV=1 - [SVIP_HUMAN]                                            | 1.163 | 0.041 |
| P35268   | 60S ribosomal protein L22 OS=Homo sapiens GN=RPL22 PE=1 SV=2 - [RL22_HUMAN]                                                   | 1.164 | 0.021 |
| Q9Y2L5-2 | Isoform 2 of Trafficking protein particle complex subunit 8 OS=Homo sapiens GN=TRAPPC8 - [TPPC8_HUMAN]                        | 1.164 | 0.047 |
| P24468   | COUP transcription factor 2 OS=Homo sapiens GN=NR2F2 PE=1 SV=1 - [COT2_HUMAN]                                                 | 1.166 | 0.025 |
| P78406   | mRNA export factor OS=Homo sapiens GN=RAE1 PE=1 SV=1 - [RAE1L_HUMAN]                                                          | 1.172 | 0.008 |
| Q99715-4 | Isoform 4 of Collagen alpha-1(XII) chain OS=Homo sapiens GN=COL12A1 - [COCA1_HUMAN]                                           | 1.172 | 0.050 |
| Q9Y6A4   | UPF0468 protein C16orf80 OS=Homo sapiens GN=C16orf80 PE=1 SV=1 - [CP080_HUMAN]                                                | 1.172 | 0.035 |

|          |                                                                                                           |       |       |
|----------|-----------------------------------------------------------------------------------------------------------|-------|-------|
| Q9Y3B3   | Transmembrane emp24 domain-containing protein 7 OS=Homo sapiens GN=TMED7 PE=1 SV=2 - [TMED7_HUMAN]        | 1.177 | 0.049 |
| Q13261-8 | Isoform 7 of Interleukin-15 receptor subunit alpha OS=Homo sapiens GN=IL15RA - [IL15RA_HUMAN]             | 1.180 | 0.014 |
| Q9NRS6-2 | Isoform 2 of Sorting nexin-15 OS=Homo sapiens GN=SNX15 - [SNX15_HUMAN]                                    | 1.182 | 0.039 |
| Q4J6C6-4 | Isoform 4 of Prolyl endopeptidase-like OS=Homo sapiens GN=PREPL - [PPCEL_HUMAN]                           | 1.183 | 0.002 |
| P62070   | Ras-related protein R-Ras2 OS=Homo sapiens GN=RRAS2 PE=1 SV=1 - [RRAS2_HUMAN]                             | 1.185 | 0.028 |
| Q86VW0   | SEC14 domain and spectrin repeat-containing protein 1 OS=Homo sapiens GN=SESTD1 PE=1 SV=2 - [SESD1_HUMAN] | 1.185 | 0.049 |
| P16383-2 | Isoform 2 of GC-rich sequence DNA-binding factor 2 OS=Homo sapiens GN=GCFC2 - [GCFC2_HUMAN]               | 1.187 | 0.021 |
| P25490   | Transcriptional repressor protein YY1 OS=Homo sapiens GN=YY1 PE=1 SV=2 - [TTY1_HUMAN]                     | 1.187 | 0.024 |
| P62995-3 | Isoform 3 of Transformer-2 protein homolog beta OS=Homo sapiens GN=TRA2B - [TRA2B_HUMAN]                  | 1.187 | 0.020 |
| P04181   | Ornithine aminotransferase, mitochondrial OS=Homo sapiens GN=OAT PE=1 SV=1 - [OAT_HUMAN]                  | 1.187 | 0.019 |
| Q8IZL8   | Proline-, glutamic acid- and leucine-rich protein 1 OS=Homo sapiens GN=PELP1 PE=1 SV=2 - [PELP1_HUMAN]    | 1.189 | 0.043 |
| Q9H974   | Queuine tRNA-ribosyltransferase subunit QTRTD1 OS=Homo sapiens GN=QTRTD1 PE=1 SV=1 - [QTRD1_HUMAN]        | 1.192 | 0.044 |
| Q7L5N1   | COP9 signalosome complex subunit 6 OS=Homo sapiens GN=COPS6 PE=1 SV=1 - [CSN6_HUMAN]                      | 1.196 | 0.014 |
| O60493   | Sorting nexin-3 OS=Homo sapiens GN=SNX3 PE=1 SV=3 - [SNX3_HUMAN]                                          | 1.196 | 0.045 |
| Q9UBG0   | C-type mannose receptor 2 OS=Homo sapiens GN=MRC2 PE=1 SV=2 - [MRC2_HUMAN]                                | 1.198 | 0.030 |
| Q9NQZ5   | StAR-related lipid transfer protein 7, mitochondrial OS=Homo sapiens GN=STARD7 PE=1 SV=2 - [STAR7_HUMAN]  | 1.198 | 0.024 |
| P23469-3 | Isoform 3 of Receptor-type tyrosine-protein phosphatase epsilon OS=Homo sapiens GN=PTPRE - [PTPRE_HUMAN]  | 1.201 | 0.042 |
| P43121   | Cell surface glycoprotein MUC18 OS=Homo sapiens GN=MCAM PE=1 SV=2 - [MUC18_HUMAN]                         | 1.202 | 0.032 |
| P02656   | Apolipoprotein C-III OS=Homo sapiens GN=APOC3 PE=1 SV=1 - [APOC3_HUMAN]                                   | 1.204 | 0.047 |
| Q9NW82   | WD repeat-containing protein 70 OS=Homo sapiens GN=WDR70 PE=1 SV=1 - [WDR70_HUMAN]                        | 1.208 | 0.016 |
| Q9Y2S7   | Polymerase delta-interacting protein 2 OS=Homo sapiens GN=POLDIP2 PE=1 SV=1 - [PDIP2_HUMAN]               | 1.214 | 0.042 |
| O43861-2 | Isoform 2 of Probable phospholipid-transporting ATPase IIB OS=Homo sapiens GN=ATP9B - [ATP9B_HUMAN]       | 1.214 | 0.040 |
| Q96L92-2 | Isoform 3 of Sorting nexin-27 OS=Homo sapiens GN=SNX27 - [SNX27_HUMAN]                                    | 1.216 | 0.003 |
| O43708-2 | Isoform 2 of Maleylacetoacetate isomerase OS=Homo sapiens GN=GSTZ1 - [MAAI_HUMAN]                         | 1.218 | 0.039 |
| Q9UL40   | Zinc finger protein 346 OS=Homo sapiens GN=ZNF346 PE=1 SV=1 - [ZN346_HUMAN]                               | 1.221 | 0.004 |
| Q14353   | Guanidinoacetate N-methyltransferase OS=Homo sapiens GN=GAMT PE=1 SV=1 - [GAMT_HUMAN]                     | 1.221 | 0.018 |
| Q9BQ24   | Zinc finger FYVE domain-containing protein 21 OS=Homo sapiens GN=ZFYVE21 PE=1 SV=1 - [ZFY21_HUMAN]        | 1.225 | 0.020 |
| P02452   | Collagen alpha-1(I) chain OS=Homo sapiens GN=COL1A1 PE=1 SV=5 - [CO1A1_HUMAN]                             | 1.231 | 0.040 |
| Q9BYI3   | Hyccin OS=Homo sapiens GN=FAM126A PE=1 SV=2 - [HYCCI_HUMAN]                                               | 1.232 | 0.038 |

|          |                                                                                                   |       |       |
|----------|---------------------------------------------------------------------------------------------------|-------|-------|
| Q15181   | Inorganic pyrophosphatase OS=Homo sapiens GN=PPA1 PE=1 SV=2 - [IPYR_HUMAN]                        | 1.235 | 0.027 |
| Q8IXH7-4 | Isoform NELF-D of Negative elongation factor C/D OS=Homo sapiens GN=TH1L - [NELFD_HUMAN]          | 1.240 | 0.046 |
| P57768   | Sorting nexin-16 OS=Homo sapiens GN=SNX16 PE=1 SV=2 - [SNX16_HUMAN]                               | 1.241 | 0.047 |
| O75419   | Cell division control protein 45 homolog OS=Homo sapiens GN=CDC45 PE=1 SV=1 - [CDC45_HUMAN]       | 1.244 | 0.044 |
| Q9HCP0-2 | Isoform 1S of Casein kinase I isoform gamma-1 OS=Homo sapiens GN=CSNK1G1 - [KC1G1_HUMAN]          | 1.244 | 0.044 |
| Q96GG9   | DCN1-like protein 1 OS=Homo sapiens GN=DCUN1D1 PE=1 SV=1 - [DCNL1_HUMAN]                          | 1.247 | 0.021 |
| O00522-2 | Isoform 2 of Krev interaction trapped protein 1 OS=Homo sapiens GN=KRIT1 - [KRIT1_HUMAN]          | 1.255 | 0.040 |
| O75911   | Short-chain dehydrogenase/reductase 3 OS=Homo sapiens GN=DHRS3 PE=1 SV=2 - [DHRS3_HUMAN]          | 1.255 | 0.015 |
| Q9UDX5   | Mitochondrial fission process protein 1 OS=Homo sapiens GN=MTFP1 PE=1 SV=1 - [MTFP1_HUMAN]        | 1.262 | 0.016 |
| P49757-4 | Isoform 4 of Protein numb homolog OS=Homo sapiens GN=NUMB - [NUMB_HUMAN]                          | 1.264 | 0.013 |
| Q8TBM8   | DnaJ homolog subfamily B member 14 OS=Homo sapiens GN=DNAJB14 PE=2 SV=1 - [DJB14_HUMAN]           | 1.265 | 0.025 |
| Q9HC52   | Chromobox protein homolog 8 OS=Homo sapiens GN=CBX8 PE=1 SV=3 - [CBX8_HUMAN]                      | 1.268 | 0.033 |
| Q8IVL1-4 | Isoform 4 of Neuron navigator 2 OS=Homo sapiens GN=NAV2 - [NAV2_HUMAN]                            | 1.270 | 0.022 |
| Q8NB15-2 | Isoform 2 of Zinc finger protein 511 OS=Homo sapiens GN=ZNF511 - [ZN511_HUMAN]                    | 1.275 | 0.017 |
| Q92879-2 | Isoform 2 of CUGBP Elav-like family member 1 OS=Homo sapiens GN=CELF1 - [CELF1_HUMAN]             | 1.277 | 0.036 |
| P49716   | CCAAT/enhancer-binding protein delta OS=Homo sapiens GN=CEBPD PE=1 SV=2 - [CEBPD_HUMAN]           | 1.288 | 0.038 |
| P62158   | Calmodulin OS=Homo sapiens GN=CALM1 PE=1 SV=2 - [CALM_HUMAN]                                      | 1.295 | 0.029 |
| P35520   | Cystathionine beta-synthase OS=Homo sapiens GN=CBS PE=1 SV=2 - [CBS_HUMAN]                        | 1.296 | 0.041 |
| Q9Y6A1-4 | Isoform 4 of Protein O-mannosyl-transferase 1 OS=Homo sapiens GN=POMT1 - [POMT1_HUMAN]            | 1.309 | 0.039 |
| Q9UIL1-4 | Isoform 4 of Short coiled-coil protein OS=Homo sapiens GN=SCOC - [SCOC_HUMAN]                     | 1.334 | 0.020 |
| P98172   | Ephrin-B1 OS=Homo sapiens GN=EFNB1 PE=1 SV=1 - [EFNB1_HUMAN]                                      | 1.337 | 0.047 |
| Q86U90   | YrdC domain-containing protein, mitochondrial OS=Homo sapiens GN=YRDC PE=1 SV=1 - [YRDC_HUMAN]    | 1.346 | 0.044 |
| O15392-7 | Isoform 7 of Baculoviral IAP repeat-containing protein 5 OS=Homo sapiens GN=BIRC5 - [BIRC5_HUMAN] | 1.352 | 0.012 |
| Q9NR33   | DNA polymerase epsilon subunit 4 OS=Homo sapiens GN=POLE4 PE=1 SV=2 - [DPOE4_HUMAN]               | 1.365 | 0.044 |
| Q9H8G2   | Uncharacterized protein C9orf82 OS=Homo sapiens GN=C9orf82 PE=1 SV=2 - [CI082_HUMAN]              | 1.371 | 0.011 |
| P14316   | Interferon regulatory factor 2 OS=Homo sapiens GN=IRF2 PE=1 SV=2 - [IRF2_HUMAN]                   | 1.379 | 0.036 |
| Q92529-2 | Isoform p52 of SHC-transforming protein 3 OS=Homo sapiens GN=SHC3 - [SHC3_HUMAN]                  | 1.390 | 0.031 |
| Q5FWF5-2 | Isoform 2 of N-acetyltransferase ESCO1 OS=Homo sapiens GN=ESCO1 - [ESCO1_HUMAN]                   | 1.399 | 0.044 |
| O00635   | Tripartite motif-containing protein 38 OS=Homo sapiens GN=TRIM38 PE=2 SV=1 - [TRI38_HUMAN]        | 1.434 | 0.045 |

|          |                                                                                                                      |       |       |
|----------|----------------------------------------------------------------------------------------------------------------------|-------|-------|
| Q8NFH3   | Nucleoporin Nup43 OS=Homo sapiens GN=NUP43 PE=1 SV=1 - [NUP43_HUMAN]                                                 | 1.468 | 0.035 |
| P11166   | Solute carrier family 2, facilitated glucose transporter member 1 OS=Homo sapiens GN=SLC2A1 PE=1 SV=2 - [GTR1_HUMAN] | 1.495 | 0.003 |
| Q99943   | 1-acyl-sn-glycerol-3-phosphate acyltransferase alpha OS=Homo sapiens GN=AGPAT1 PE=2 SV=2 - [PLCA_HUMAN]              | 1.501 | 0.049 |
| O14735   | CDP-diacylglycerol--inositol 3-phosphatidyltransferase OS=Homo sapiens GN=CDIPT PE=1 SV=1 - [CDIPT_HUMAN]            | 1.516 | 0.034 |
| O15235   | 28S ribosomal protein S12, mitochondrial OS=Homo sapiens GN=MRPS12 PE=1 SV=1 - [RT12_HUMAN]                          | 1.584 | 0.027 |
| P06241-3 | Isoform 3 of Tyrosine-protein kinase Fyn OS=Homo sapiens GN=FYN - [FYN_HUMAN]                                        | 1.663 | 0.048 |
| P42766   | 60S ribosomal protein L35 OS=Homo sapiens GN=RPL35 PE=1 SV=2 - [RL35_HUMAN]                                          | 1.689 | 0.019 |
| Q9BZM5   | NKG2D ligand 2 OS=Homo sapiens GN=ULBP2 PE=1 SV=1 - [N2DL2_HUMAN]                                                    | 1.705 | 0.003 |
| Q9Y3E7-4 | Isoform 4 of Charged multivesicular body protein 3 OS=Homo sapiens GN=CHMP3 - [CHMP3_HUMAN]                          | 1.760 | 0.043 |
| Q15819   | Ubiquitin-conjugating enzyme E2 variant 2 OS=Homo sapiens GN=UBE2V2 PE=1 SV=4 - [UB2V2_HUMAN]                        | 1.911 | 0.046 |
| O15145   | Actin-related protein 2/3 complex subunit 3 OS=Homo sapiens GN=ARPC3 PE=1 SV=3 - [ARPC3_HUMAN]                       | 2.512 | 0.045 |

**H727 cells - 2 hours lanreotide (397 proteins)**

|          |                                                                                                                         |       |       |
|----------|-------------------------------------------------------------------------------------------------------------------------|-------|-------|
| P84243   | Histone H3.3 OS=Homo sapiens GN=H3F3A PE=1 SV=2 - [H33_HUMAN]                                                           | 0.523 | 0.013 |
| Q6DD87   | Zinc finger protein 787 OS=Homo sapiens GN=ZNF787 PE=1 SV=2 - [ZN787_HUMAN]                                             | 0.641 | 0.038 |
| P53671-2 | Isoform LIMK2b of LIM domain kinase 2 OS=Homo sapiens GN=LIMK2 - [LIMK2_HUMAN]                                          | 0.719 | 0.042 |
| Q9UJH8   | Meteorin OS=Homo sapiens GN=METR_N PE=2 SV=2 - [METRN_HUMAN]                                                            | 0.758 | 0.030 |
| Q8IZQ1-2 | Isoform 2 of WD repeat and FYVE domain-containing protein 3 OS=Homo sapiens GN=WDFY3 - [WDFY3_HUMAN]                    | 0.783 | 0.048 |
| Q9UPQ8   | Dolichol kinase OS=Homo sapiens GN=DOLK PE=1 SV=1 - [DOLK_HUMAN]                                                        | 0.788 | 0.042 |
| O94766   | Galactosylgalactosylxylosylprotein 3-beta-glucuronosyltransferase 3 OS=Homo sapiens GN=B3GAT3 PE=1 SV=2 - [B3GA3_HUMAN] | 0.798 | 0.035 |
| P05981   | Serine protease hepsin OS=Homo sapiens GN=HPN PE=1 SV=1 - [HEPS_HUMAN]                                                  | 0.798 | 0.001 |
| Q9BVS4   | Serine/threonine-protein kinase RIO2 OS=Homo sapiens GN=RIOK2 PE=1 SV=2 - [RIOK2_HUMAN]                                 | 0.811 | 0.016 |
| Q2TAA2   | Isoamyl acetate-hydrolyzing esterase 1 homolog OS=Homo sapiens GN=IAH1 PE=1 SV=1 - [IAH1_HUMAN]                         | 0.822 | 0.004 |
| O00220   | Tumor necrosis factor receptor superfamily member 10A OS=Homo sapiens GN=TNFRSF10A PE=1 SV=3 - [TR10A_HUMAN]            | 0.825 | 0.015 |
| Q96DZ1   | Endoplasmic reticulum lectin 1 OS=Homo sapiens GN=ERLEC1 PE=1 SV=1 - [ERLEC_HUMAN]                                      | 0.827 | 0.042 |
| Q8N183   | Mimitin, mitochondrial OS=Homo sapiens GN=NDUF2 PE=1 SV=1 - [MIMIT_HUMAN]                                               | 0.828 | 0.030 |
| O75356   | Ectonucleoside triphosphate diphosphohydrolase 5 OS=Homo sapiens GN=ENTPD5 PE=1 SV=1 - [ENTP5_HUMAN]                    | 0.828 | 0.049 |
| Q96AB3   | Isochorismatase domain-containing protein 2, mitochondrial OS=Homo sapiens GN=ISOC2 PE=1 SV=1 - [ISOC2_HUMAN]           | 0.831 | 0.014 |
| Q8NCR9   | Clarín-3 OS=Homo sapiens GN=CLRN3 PE=2 SV=1 - [CLRN3_HUMAN]                                                             | 0.851 | 0.034 |

|          |                                                                                                                                                       |       |       |
|----------|-------------------------------------------------------------------------------------------------------------------------------------------------------|-------|-------|
| O75838   | Calcium and integrin-binding family member 2 OS=Homo sapiens GN=CIB2 PE=2 SV=1 - [CIB2_HUMAN]                                                         | 0.852 | 0.042 |
| P62854   | 40S ribosomal protein S26 OS=Homo sapiens GN=RPS26 PE=1 SV=3 - [RS26_HUMAN]                                                                           | 0.856 | 0.003 |
| Q8WW12-2 | Isoform 2 of PEST proteolytic signal-containing nuclear protein OS=Homo sapiens GN=PCNP - [PCNP_HUMAN]                                                | 0.857 | 0.043 |
| Q7Z5U6   | WD repeat-containing protein 53 OS=Homo sapiens GN=WDR53 PE=2 SV=1 - [WDR53_HUMAN]                                                                    | 0.858 | 0.029 |
| P0CG38   | POTE ankyrin domain family member I OS=Homo sapiens GN=POTEI PE=3 SV=1 - [POTEI_HUMAN]                                                                | 0.858 | 0.047 |
| O60858   | E3 ubiquitin-protein ligase TRIM13 OS=Homo sapiens GN=TRIM13 PE=1 SV=2 - [TRIM13_HUMAN]                                                               | 0.859 | 0.020 |
| P60484   | Phosphatidylinositol-3,4,5-trisphosphate 3-phosphatase and dual-specificity protein phosphatase PTEN OS=Homo sapiens GN=PTEN PE=1 SV=1 - [PTEN_HUMAN] | 0.863 | 0.034 |
| Q9BSA9   | Transmembrane protein 175 OS=Homo sapiens GN=TMEM175 PE=1 SV=1 - [TM175_HUMAN]                                                                        | 0.865 | 0.029 |
| Q5TC12   | ATP synthase mitochondrial F1 complex assembly factor 1 OS=Homo sapiens GN=ATPAF1 PE=1 SV=1 - [ATPF1_HUMAN]                                           | 0.865 | 0.016 |
| O43581   | Synaptotagmin-7 OS=Homo sapiens GN=SYT7 PE=1 SV=3 - [SYT7_HUMAN]                                                                                      | 0.867 | 0.041 |
| P45880-2 | Isoform 2 of Voltage-dependent anion-selective channel protein 2 OS=Homo sapiens GN=VDAC2 - [VDAC2_HUMAN]                                             | 0.869 | 0.034 |
| Q9BT43   | DNA-directed RNA polymerase III subunit RPC7-like OS=Homo sapiens GN=POLR3GL PE=2 SV=1 - [RPC7L_HUMAN]                                                | 0.873 | 0.041 |
| Q9HBL7   | Transmembrane protein C9orf46 OS=Homo sapiens GN=C9orf46 PE=2 SV=1 - [CI046_HUMAN]                                                                    | 0.873 | 0.038 |
| Q5VWZ2-2 | Isoform 2 of Lysophospholipase-like protein 1 OS=Homo sapiens GN=LYPLAL1 - [LYPL1_HUMAN]                                                              | 0.874 | 0.001 |
| O95400   | CD2 antigen cytoplasmic tail-binding protein 2 OS=Homo sapiens GN=CD2BP2 PE=1 SV=1 - [CD2B2_HUMAN]                                                    | 0.874 | 0.001 |
| Q86WQ0   | Nuclear receptor 2C2-associated protein OS=Homo sapiens GN=NR2C2AP PE=1 SV=1 - [NR2CA_HUMAN]                                                          | 0.878 | 0.023 |
| P05204   | Non-histone chromosomal protein HMG-17 OS=Homo sapiens GN=HMGN2 PE=1 SV=3 - [HMGN2_HUMAN]                                                             | 0.879 | 0.019 |
| Q96SI9   | Spermatid perinuclear RNA-binding protein OS=Homo sapiens GN=STRBP PE=1 SV=1 - [STRBP_HUMAN]                                                          | 0.879 | 0.047 |
| Q9BXT8-4 | Isoform 4 of RING finger protein 17 OS=Homo sapiens GN=RNF17 - [RNF17_HUMAN]                                                                          | 0.881 | 0.018 |
| P15121   | Aldose reductase OS=Homo sapiens GN=AKR1B1 PE=1 SV=3 - [ALDR_HUMAN]                                                                                   | 0.885 | 0.050 |
| Q14508-2 | Isoform 2 of WAP four-disulfide core domain protein 2 OS=Homo sapiens GN=WFDC2 - [WFDC2_HUMAN]                                                        | 0.886 | 0.021 |
| Q9BS40   | Latexin OS=Homo sapiens GN=LXN PE=1 SV=2 - [LXN_HUMAN]                                                                                                | 0.886 | 0.014 |
| O60613   | 15 kDa selenoprotein OS=Homo sapiens GN=SEP15 PE=1 SV=3 - [SEP15_HUMAN]                                                                               | 0.886 | 0.036 |
| Q9NQ88   | Probable fructose-2,6-bisphosphatase TIGAR OS=Homo sapiens GN=TIGAR PE=1 SV=1 - [TIGAR_HUMAN]                                                         | 0.888 | 0.018 |
| Q99622   | Protein C10 OS=Homo sapiens GN=C12orf57 PE=1 SV=1 - [C10_HUMAN]                                                                                       | 0.889 | 0.001 |
| P30405   | Peptidyl-prolyl cis-trans isomerase F, mitochondrial OS=Homo sapiens GN=PPIF PE=1 SV=1 - [PPIF_HUMAN]                                                 | 0.891 | 0.038 |
| Q969H8   | UPF0556 protein C19orf10 OS=Homo sapiens GN=C19orf10 PE=1 SV=1 - [CS010_HUMAN]                                                                        | 0.892 | 0.032 |
| Q9BY50   | Signal peptidase complex catalytic subunit SEC11C OS=Homo sapiens GN=SEC11C PE=1 SV=3 - [SC11C_HUMAN]                                                 | 0.892 | 0.012 |

|          |                                                                                                                                                           |       |       |
|----------|-----------------------------------------------------------------------------------------------------------------------------------------------------------|-------|-------|
| Q12797   | Aspartyl/asparaginyl beta-hydroxylase OS=Homo sapiens GN=ASPH PE=1 SV=3 - [ASPH_HUMAN]                                                                    | 0.892 | 0.045 |
| P11387   | DNA topoisomerase 1 OS=Homo sapiens GN=TOP1 PE=1 SV=2 - [TOP1_HUMAN]                                                                                      | 0.893 | 0.043 |
| Q8N4P3   | Guanosine-3',5'-bis(diphosphate) 3'-pyrophosphohydrolase MESH1 OS=Homo sapiens GN=HDDC3 PE=1 SV=3 - [MESH1_HUMAN]                                         | 0.895 | 0.002 |
| Q6NUQ1   | RAD50-interacting protein 1 OS=Homo sapiens GN=RINT1 PE=1 SV=1 - [RINT1_HUMAN]                                                                            | 0.896 | 0.035 |
| Q15717   | ELAV-like protein 1 OS=Homo sapiens GN=ELAVL1 PE=1 SV=2 - [ELAV1_HUMAN]                                                                                   | 0.896 | 0.040 |
| Q05682-5 | Isoform 5 of Caldesmon OS=Homo sapiens GN=CALD1 - [CALD1_HUMAN]                                                                                           | 0.896 | 0.047 |
| Q9NWM0-2 | Isoform 2 of Spermine oxidase OS=Homo sapiens GN=SMOX - [SMOX_HUMAN]                                                                                      | 0.896 | 0.048 |
| Q99547   | M-phase phosphoprotein 6 OS=Homo sapiens GN=MPHOSPH6 PE=1 SV=2 - [MPH6_HUMAN]                                                                             | 0.897 | 0.019 |
| O00217   | NADH dehydrogenase [ubiquinone] iron-sulfur protein 8, mitochondrial OS=Homo sapiens GN=NDUFS8 PE=1 SV=1 - [NDUS8_HUMAN]                                  | 0.898 | 0.047 |
| P82664   | 28S ribosomal protein S10, mitochondrial OS=Homo sapiens GN=MRPS10 PE=1 SV=2 - [RT10_HUMAN]                                                               | 0.898 | 0.026 |
| Q9NZD2   | Glycolipid transfer protein OS=Homo sapiens GN=GLTP PE=1 SV=3 - [GLTP_HUMAN]                                                                              | 0.898 | 0.029 |
| Q9BVK6   | Transmembrane emp24 domain-containing protein 9 OS=Homo sapiens GN=TMED9 PE=1 SV=2 - [TMED9_HUMAN]                                                        | 0.900 | 0.025 |
| P00505   | Aspartate aminotransferase, mitochondrial OS=Homo sapiens GN=GOT2 PE=1 SV=3 - [AATM_HUMAN]                                                                | 0.900 | 0.000 |
| P82914   | 28S ribosomal protein S15, mitochondrial OS=Homo sapiens GN=MRPS15 PE=1 SV=1 - [RT15_HUMAN]                                                               | 0.900 | 0.024 |
| P62820   | Ras-related protein Rab-1A OS=Homo sapiens GN=RAB1A PE=1 SV=3 - [RAB1A_HUMAN]                                                                             | 0.902 | 0.013 |
| Q9NUE0   | Palmitoyltransferase ZDHHC18 OS=Homo sapiens GN=ZDHHC18 PE=2 SV=2 - [ZDH18_HUMAN]                                                                         | 0.903 | 0.013 |
| O94874-2 | Isoform 2 of E3 UFM1-protein ligase 1 OS=Homo sapiens GN=UFL1 - [UFL1_HUMAN]                                                                              | 0.904 | 0.032 |
| O95363   | Phenylalanine--tRNA ligase, mitochondrial OS=Homo sapiens GN=FARS2 PE=1 SV=1 - [SYFM_HUMAN]                                                               | 0.906 | 0.027 |
| Q8N1G0   | Zinc finger protein 687 OS=Homo sapiens GN=ZNF687 PE=1 SV=1 - [ZN687_HUMAN]                                                                               | 0.906 | 0.001 |
| Q04837   | Single-stranded DNA-binding protein, mitochondrial OS=Homo sapiens GN=SSBP1 PE=1 SV=1 - [SSBP_HUMAN]                                                      | 0.907 | 0.016 |
| Q13405   | 39S ribosomal protein L49, mitochondrial OS=Homo sapiens GN=MRPL49 PE=1 SV=1 - [RM49_HUMAN]                                                               | 0.907 | 0.028 |
| Q15390   | Mitochondrial fission regulator 1 OS=Homo sapiens GN=MTFR1 PE=1 SV=2 - [MTFR1_HUMAN]                                                                      | 0.908 | 0.020 |
| P42765   | 3-ketoacyl-CoA thiolase, mitochondrial OS=Homo sapiens GN=ACAA2 PE=1 SV=2 - [THIM_HUMAN]                                                                  | 0.908 | 0.039 |
| P07711   | Cathepsin L1 OS=Homo sapiens GN=CTSL1 PE=1 SV=2 - [CATL1_HUMAN]                                                                                           | 0.910 | 0.034 |
| P10515   | Dihydrolipoyllysine-residue acetyltransferase component of pyruvate dehydrogenase complex, mitochondrial OS=Homo sapiens GN=DLAT PE=1 SV=3 - [ODP2_HUMAN] | 0.912 | 0.045 |
| O75489   | NADH dehydrogenase [ubiquinone] iron-sulfur protein 3, mitochondrial OS=Homo sapiens GN=NDUFS3 PE=1 SV=1 - [NDUS3_HUMAN]                                  | 0.913 | 0.034 |
| Q13740-2 | Isoform 2 of CD166 antigen OS=Homo sapiens GN=ALCAM - [CD166_HUMAN]                                                                                       | 0.914 | 0.042 |
| P49458   | Signal recognition particle 9 kDa protein OS=Homo sapiens GN=SRP9 PE=1 SV=2 - [SRP09_HUMAN]                                                               | 0.914 | 0.044 |

|          |                                                                                                                     |       |       |
|----------|---------------------------------------------------------------------------------------------------------------------|-------|-------|
| Q9UNA1-2 | Isoform 2 of Rho GTPase-activating protein 26 OS=Homo sapiens GN=ARHGAP26 - [RHG26_HUMAN]                           | 0.914 | 0.022 |
| P43007   | Neutral amino acid transporter A OS=Homo sapiens GN=SLC1A4 PE=1 SV=1 - [SATT_HUMAN]                                 | 0.915 | 0.039 |
| Q99459   | Cell division cycle 5-like protein OS=Homo sapiens GN=CDC5L PE=1 SV=2 - [CDC5L_HUMAN]                               | 0.917 | 0.027 |
| P49802-2 | Isoform 2 of Regulator of G-protein signaling 7 OS=Homo sapiens GN=RGS7 - [RGS7_HUMAN]                              | 0.917 | 0.036 |
| Q6NZY4   | Zinc finger CCHC domain-containing protein 8 OS=Homo sapiens GN=ZCCHC8 PE=1 SV=2 - [ZCHC8_HUMAN]                    | 0.917 | 0.033 |
| Q96G03   | Phosphoglucomutase-2 OS=Homo sapiens GN=PGM2 PE=1 SV=4 - [PGM2_HUMAN]                                               | 0.917 | 0.047 |
| P37287   | Phosphatidylinositol N-acetylglucosaminyltransferase subunit A OS=Homo sapiens GN=PIGA PE=1 SV=1 - [PIGA_HUMAN]     | 0.918 | 0.019 |
| Q9H9H4   | Vacuolar protein sorting-associated protein 37B OS=Homo sapiens GN=VPS37B PE=1 SV=1 - [VP37B_HUMAN]                 | 0.919 | 0.034 |
| O95372   | Acyl-protein thioesterase 2 OS=Homo sapiens GN=LYPLA2 PE=1 SV=1 - [LYPA2_HUMAN]                                     | 0.920 | 0.032 |
| Q9NV06   | DDB1- and CUL4-associated factor 13 OS=Homo sapiens GN=DCAF13 PE=1 SV=2 - [DCA13_HUMAN]                             | 0.920 | 0.009 |
| Q92759   | General transcription factor IIH subunit 4 OS=Homo sapiens GN=GTF2H4 PE=2 SV=1 - [TF2H4_HUMAN]                      | 0.920 | 0.005 |
| Q8NBX0   | Saccharopine dehydrogenase-like oxidoreductase OS=Homo sapiens GN=SCCPDH PE=1 SV=1 - [SCPDL_HUMAN]                  | 0.921 | 0.029 |
| Q02880-2 | Isoform Beta-1 of DNA topoisomerase 2-beta OS=Homo sapiens GN=TOP2B - [TOP2B_HUMAN]                                 | 0.922 | 0.009 |
| Q9C040   | Tripartite motif-containing protein 2 OS=Homo sapiens GN=TRIM2 PE=1 SV=1 - [TRIM2_HUMAN]                            | 0.922 | 0.012 |
| P27797   | Calreticulin OS=Homo sapiens GN=CALR PE=1 SV=1 - [CALR_HUMAN]                                                       | 0.922 | 0.006 |
| Q9NQE9   | Histidine triad nucleotide-binding protein 3 OS=Homo sapiens GN=HINT3 PE=1 SV=1 - [HINT3_HUMAN]                     | 0.923 | 0.013 |
| P11177-2 | Isoform 2 of Pyruvate dehydrogenase E1 component subunit beta, mitochondrial OS=Homo sapiens GN=PDHB - [ODPB_HUMAN] | 0.923 | 0.015 |
| P13010   | X-ray repair cross-complementing protein 5 OS=Homo sapiens GN=XRCC5 PE=1 SV=3 - [XRCC5_HUMAN]                       | 0.925 | 0.026 |
| P37108   | Signal recognition particle 14 kDa protein OS=Homo sapiens GN=SRP14 PE=1 SV=2 - [SRP14_HUMAN]                       | 0.928 | 0.019 |
| Q99623   | Prohibitin-2 OS=Homo sapiens GN=PHB2 PE=1 SV=2 - [PHB2_HUMAN]                                                       | 0.929 | 0.042 |
| O00559   | Receptor-binding cancer antigen expressed on SiSo cells OS=Homo sapiens GN=EBAG9 PE=1 SV=1 - [RCAS1_HUMAN]          | 0.930 | 0.038 |
| O15014   | Zinc finger protein 609 OS=Homo sapiens GN=ZNF609 PE=1 SV=2 - [ZN609_HUMAN]                                         | 0.931 | 0.048 |
| O75506   | Heat shock factor-binding protein 1 OS=Homo sapiens GN=HSBP1 PE=1 SV=1 - [HSBP1_HUMAN]                              | 0.931 | 0.042 |
| Q92484   | Acid sphingomyelinase-like phosphodiesterase 3a OS=Homo sapiens GN=SMPDL3A PE=1 SV=2 - [ASM3A_HUMAN]                | 0.932 | 0.025 |
| P83916   | Chromobox protein homolog 1 OS=Homo sapiens GN=CBX1 PE=1 SV=1 - [CBX1_HUMAN]                                        | 0.933 | 0.020 |
| P05455   | Lupus La protein OS=Homo sapiens GN=SSB PE=1 SV=2 - [LA_HUMAN]                                                      | 0.933 | 0.010 |
| Q92552   | 28S ribosomal protein S27, mitochondrial OS=Homo sapiens GN=MRPS27 PE=1 SV=3 - [RT27_HUMAN]                         | 0.934 | 0.042 |
| Q00839-2 | Isoform Short of Heterogeneous nuclear ribonucleoprotein U OS=Homo sapiens GN=HNRNPU - [HNRPU_HUMAN]                | 0.935 | 0.015 |
| P21127-8 | Isoform 8 of Cyclin-dependent kinase 11B OS=Homo sapiens GN=CDK11B - [CD11B_HUMAN]                                  | 0.936 | 0.018 |

|          |                                                                                                                                    |       |       |
|----------|------------------------------------------------------------------------------------------------------------------------------------|-------|-------|
| Q9Y3A3-2 | Isoform 2 of MOB-like protein phocein OS=Homo sapiens GN=MOB4 - [PHOCN_HUMAN]                                                      | 0.936 | 0.022 |
| Q9H0W9-2 | Isoform 2 of Ester hydrolase C11orf54 OS=Homo sapiens GN=C11orf54 - [CK054_HUMAN]                                                  | 0.936 | 0.031 |
| Q9UNM6   | 26S proteasome non-ATPase regulatory subunit 13 OS=Homo sapiens GN=PSMD13 PE=1 SV=2 - [PSD13_HUMAN]                                | 0.936 | 0.001 |
| P12532   | Creatine kinase U-type, mitochondrial OS=Homo sapiens GN=CKMT1A PE=1 SV=1 - [KCRU_HUMAN]                                           | 0.937 | 0.023 |
| P10636-4 | Isoform Tau-B of Microtubule-associated protein tau OS=Homo sapiens GN=MAPT - [TAU_HUMAN]                                          | 0.937 | 0.030 |
| Q12904   | Aminoacyl tRNA synthase complex-interacting multifunctional protein 1 OS=Homo sapiens GN=AIMP1 PE=1 SV=2 - [AIMP1_HUMAN]           | 0.938 | 0.033 |
| Q75QN2-2 | Isoform 2 of Integrator complex subunit 8 OS=Homo sapiens GN=INTS8 - [INT8_HUMAN]                                                  | 0.939 | 0.004 |
| P39656   | Dolichyl-diphosphooligosaccharide--protein glycosyltransferase 48 kDa subunit OS=Homo sapiens GN=DDOST PE=1 SV=4 - [OST48_HUMAN]   | 0.940 | 0.041 |
| Q32P41   | tRNA (guanine(37)-N1)-methyltransferase OS=Homo sapiens GN=TRMT5 PE=1 SV=2 - [TRM5_HUMAN]                                          | 0.940 | 0.023 |
| Q9H490-2 | Isoform 2 of Phosphatidylinositol glycan anchor biosynthesis class U protein OS=Homo sapiens GN=PIGU - [PIGU_HUMAN]                | 0.945 | 0.024 |
| P26368-2 | Isoform 2 of Splicing factor U2AF 65 kDa subunit OS=Homo sapiens GN=U2AF2 - [U2AF2_HUMAN]                                          | 0.945 | 0.010 |
| Q8NA19-2 | Isoform 2 of Lethal(3)malignant brain tumor-like protein 4 OS=Homo sapiens GN=L3MBTL4 - [LMBL4_HUMAN]                              | 0.946 | 0.024 |
| O15511   | Actin-related protein 2/3 complex subunit 5 OS=Homo sapiens GN=ARPC5 PE=1 SV=3 - [ARPC5_HUMAN]                                     | 0.947 | 0.032 |
| Q9H0U4   | Ras-related protein Rab-1B OS=Homo sapiens GN=RAB1B PE=1 SV=1 - [RAB1B_HUMAN]                                                      | 0.947 | 0.032 |
| Q13561   | Dynactin subunit 2 OS=Homo sapiens GN=DCTN2 PE=1 SV=4 - [DCTN2_HUMAN]                                                              | 0.947 | 0.048 |
| Q96AQ8   | Coiled-coil domain-containing protein 90A, mitochondrial OS=Homo sapiens GN=CCDC90A PE=2 SV=1 - [CC90A_HUMAN]                      | 0.948 | 0.002 |
| Q969Q5   | Ras-related protein Rab-24 OS=Homo sapiens GN=RAB24 PE=1 SV=1 - [RAB24_HUMAN]                                                      | 0.949 | 0.040 |
| P41732   | Tetraspanin-7 OS=Homo sapiens GN=TSPAN7 PE=1 SV=2 - [TSN7_HUMAN]                                                                   | 0.950 | 0.036 |
| Q06481   | Amyloid-like protein 2 OS=Homo sapiens GN=APLP2 PE=1 SV=2 - [APLP2_HUMAN]                                                          | 0.951 | 0.030 |
| P05783   | Keratin, type I cytoskeletal 18 OS=Homo sapiens GN=KRT18 PE=1 SV=2 - [K1C18_HUMAN]                                                 | 0.951 | 0.038 |
| Q99797   | Mitochondrial intermediate peptidase OS=Homo sapiens GN=MIPEP PE=1 SV=2 - [MIPEP_HUMAN]                                            | 0.951 | 0.002 |
| P43304   | Glycerol-3-phosphate dehydrogenase, mitochondrial OS=Homo sapiens GN=GPD2 PE=1 SV=3 - [GPDM_HUMAN]                                 | 0.954 | 0.008 |
| O14524   | Transmembrane protein 194A OS=Homo sapiens GN=TMEM194A PE=1 SV=2 - [T194A_HUMAN]                                                   | 0.954 | 0.046 |
| P35232   | Prohibitin OS=Homo sapiens GN=PHB PE=1 SV=1 - [PHB_HUMAN]                                                                          | 0.955 | 0.037 |
| O00165-5 | Isoform 5 of HCLS1-associated protein X-1 OS=Homo sapiens GN=HAX1 - [HAX1_HUMAN]                                                   | 0.955 | 0.042 |
| Q96C90   | Protein phosphatase 1 regulatory subunit 14B OS=Homo sapiens GN=PPP1R14B PE=1 SV=3 - [PP14B_HUMAN]                                 | 0.956 | 0.048 |
| Q9BVS5   | Potential tRNA (adenine(58)-N(1))-methyltransferase catalytic subunit TRMT61B OS=Homo sapiens GN=TRMT61B PE=1 SV=2 - [TR61B_HUMAN] | 0.958 | 0.036 |
| Q6PL24   | Protein TMED8 OS=Homo sapiens GN=TMED8 PE=1 SV=1 - [TMED8_HUMAN]                                                                   | 0.959 | 0.006 |
| P41091   | Eukaryotic translation initiation factor 2 subunit 3 OS=Homo sapiens GN=EIF2S3 PE=1 SV=3 - [IF2G_HUMAN]                            | 0.960 | 0.047 |



|          |                                                                                                               |       |       |
|----------|---------------------------------------------------------------------------------------------------------------|-------|-------|
| Q8WXF1-2 | Isoform 2 of Paraspeckle component 1 OS=Homo sapiens GN=PSPC1 - [PSPC1_HUMAN]                                 | 0.962 | 0.009 |
| Q5JRX3   | Presequence protease, mitochondrial OS=Homo sapiens GN=PITRM1 PE=1 SV=2 - [PREP_HUMAN]                        | 0.962 | 0.035 |
| P10809   | 60 kDa heat shock protein, mitochondrial OS=Homo sapiens GN=HSPD1 PE=1 SV=2 - [CH60_HUMAN]                    | 0.965 | 0.024 |
| P09104   | Gamma-enolase OS=Homo sapiens GN=ENO2 PE=1 SV=3 - [ENOG_HUMAN]                                                | 0.966 | 0.020 |
| P42858   | Huntingtin OS=Homo sapiens GN=HTT PE=1 SV=2 - [HD_HUMAN]                                                      | 0.966 | 0.023 |
| Q12962   | Transcription initiation factor TFIID subunit 10 OS=Homo sapiens GN=TAF10 PE=1 SV=1 - [TAF10_HUMAN]           | 0.967 | 0.000 |
| Q9NZB2-4 | Isoform D of Constitutive coactivator of PPAR-gamma-like protein 1 OS=Homo sapiens GN=FAM120A - [F120A_HUMAN] | 0.968 | 0.016 |
| Q9BXP5-4 | Isoform 4 of Serrate RNA effector molecule homolog OS=Homo sapiens GN=SRRT - [SRRT_HUMAN]                     | 0.968 | 0.034 |
| P61421   | V-type proton ATPase subunit d 1 OS=Homo sapiens GN=ATP6V0D1 PE=1 SV=1 - [VA0D1_HUMAN]                        | 0.969 | 0.039 |
| P07910-2 | Isoform C1 of Heterogeneous nuclear ribonucleoproteins C1/C2 OS=Homo sapiens GN=HNRNPC - [HNRPC_HUMAN]        | 0.970 | 0.043 |
| Q96H20-2 | Isoform 2 of Vacuolar-sorting protein SNF8 OS=Homo sapiens GN=SNF8 - [SNF8_HUMAN]                             | 0.972 | 0.011 |
| P07437   | Tubulin beta chain OS=Homo sapiens GN=TUBB PE=1 SV=2 - [TBB5_HUMAN]                                           | 0.973 | 0.040 |
| Q08211   | ATP-dependent RNA helicase A OS=Homo sapiens GN=DHX9 PE=1 SV=4 - [DHX9_HUMAN]                                 | 0.977 | 0.047 |
| Q8N392-2 | Isoform 2 of Rho GTPase-activating protein 18 OS=Homo sapiens GN=ARHGAP18 - [RHG18_HUMAN]                     | 0.981 | 0.018 |
| Q8WUM4   | Programmed cell death 6-interacting protein OS=Homo sapiens GN=PDCD6IP PE=1 SV=1 - [PDC6I_HUMAN]              | 0.984 | 0.022 |
| P06733   | Alpha-enolase OS=Homo sapiens GN=ENO1 PE=1 SV=2 - [ENOA_HUMAN]                                                | 0.986 | 0.044 |
| Q96S19-3 | Isoform 3 of UPF0585 protein C16orf13 OS=Homo sapiens GN=C16orf13 - [CP013_HUMAN]                             | 1.011 | 0.005 |
| P42345   | Serine/threonine-protein kinase mTOR OS=Homo sapiens GN=MTOR PE=1 SV=1 - [MTOR_HUMAN]                         | 1.021 | 0.034 |
| Q9NVU7   | Protein SDA1 homolog OS=Homo sapiens GN=SDAD1 PE=1 SV=3 - [SDA1_HUMAN]                                        | 1.022 | 0.029 |
| P52735-3 | Isoform 3 of Guanine nucleotide exchange factor VAV2 OS=Homo sapiens GN=VAV2 - [VAV2_HUMAN]                   | 1.024 | 0.009 |
| Q15796-2 | Isoform Short of Mothers against decapentaplegic homolog 2 OS=Homo sapiens GN=SMAD2 - [SMAD2_HUMAN]           | 1.026 | 0.026 |
| O60292   | Signal-induced proliferation-associated 1-like protein 3 OS=Homo sapiens GN=SIPA1L3 PE=1 SV=3 - [SI1L3_HUMAN] | 1.028 | 0.002 |
| Q9H0N5   | Pterin-4-alpha-carbinolamine dehydratase 2 OS=Homo sapiens GN=PCBD2 PE=1 SV=4 - [PHS2_HUMAN]                  | 1.032 | 0.026 |
| Q6PI98   | INO80 complex subunit C OS=Homo sapiens GN=INO80C PE=1 SV=1 - [IN80C_HUMAN]                                   | 1.042 | 0.037 |
| Q99576-4 | Isoform 3 of TSC22 domain family protein 3 OS=Homo sapiens GN=TSC22D3 - [T22D3_HUMAN]                         | 1.042 | 0.032 |
| O15379   | Histone deacetylase 3 OS=Homo sapiens GN=HDAC3 PE=1 SV=2 - [HDAC3_HUMAN]                                      | 1.042 | 0.026 |
| Q8IY18   | Structural maintenance of chromosomes protein 5 OS=Homo sapiens GN=SMC5 PE=1 SV=2 - [SMC5_HUMAN]              | 1.043 | 0.011 |
| Q96A65   | Exocyst complex component 4 OS=Homo sapiens GN=EXOC4 PE=1 SV=1 - [EXOC4_HUMAN]                                | 1.043 | 0.043 |
| Q9BQ04   | RNA-binding protein 4B OS=Homo sapiens GN=RBM4B PE=1 SV=1 - [RBM4B_HUMAN]                                     | 1.044 | 0.017 |

|           |                                                                                                         |       |       |
|-----------|---------------------------------------------------------------------------------------------------------|-------|-------|
| Q96T51    | RUN and FYVE domain-containing protein 1 OS=Homo sapiens GN=RUFY1 PE=1 SV=2 - [RUFY1_HUMAN]             | 1.046 | 0.022 |
| O14976    | Cyclin-G-associated kinase OS=Homo sapiens GN=GAK PE=1 SV=2 - [GAK_HUMAN]                               | 1.050 | 0.049 |
| Q9H2P0    | Activity-dependent neuroprotector homeobox protein OS=Homo sapiens GN=ADNP PE=1 SV=1 - [ADNP_HUMAN]     | 1.050 | 0.024 |
| Q99470    | Stromal cell-derived factor 2 OS=Homo sapiens GN=SDF2 PE=1 SV=2 - [SDF2_HUMAN]                          | 1.053 | 0.044 |
| O00291    | Huntingtin-interacting protein 1 OS=Homo sapiens GN=HIP1 PE=1 SV=5 - [HIP1_HUMAN]                       | 1.054 | 0.019 |
| O96017-12 | Isoform 12 of Serine/threonine-protein kinase Chk2 OS=Homo sapiens GN=CHK2 - [CHK2_HUMAN]               | 1.055 | 0.033 |
| Q9NTK5    | Obg-like ATPase 1 OS=Homo sapiens GN=OLA1 PE=1 SV=2 - [OLA1_HUMAN]                                      | 1.058 | 0.017 |
| Q9NWT6    | Hypoxia-inducible factor 1-alpha inhibitor OS=Homo sapiens GN=HIF1AN PE=1 SV=2 - [HIF1N_HUMAN]          | 1.060 | 0.005 |
| Q96S55-2  | Isoform 2 of ATPase WRNIP1 OS=Homo sapiens GN=WRNIP1 - [WRIP1_HUMAN]                                    | 1.061 | 0.036 |
| Q53RY4-2  | Isoform 2 of Keratinocyte-associated protein 3 OS=Homo sapiens GN=KRTCAP3 - [KCP3_HUMAN]                | 1.062 | 0.050 |
| Q00537    | Cyclin-dependent kinase 17 OS=Homo sapiens GN=CDK17 PE=1 SV=2 - [CDK17_HUMAN]                           | 1.063 | 0.024 |
| Q7Z7G8-2  | Isoform 2 of Vacuolar protein sorting-associated protein 13B OS=Homo sapiens GN=VPS13B - [VP13B_HUMAN]  | 1.064 | 0.045 |
| P61962    | DDB1- and CUL4-associated factor 7 OS=Homo sapiens GN=DCAF7 PE=1 SV=1 - [DCAF7_HUMAN]                   | 1.064 | 0.037 |
| Q99543    | DnaJ homolog subfamily C member 2 OS=Homo sapiens GN=DNAJC2 PE=1 SV=4 - [DNJC2_HUMAN]                   | 1.064 | 0.043 |
| P34896-3  | Isoform 3 of Serine hydroxymethyltransferase, cytosolic OS=Homo sapiens GN=SHMT1 - [GLYC_HUMAN]         | 1.066 | 0.017 |
| P35250    | Replication factor C subunit 2 OS=Homo sapiens GN=RFC2 PE=1 SV=3 - [RFC2_HUMAN]                         | 1.067 | 0.006 |
| Q15911    | Zinc finger homeobox protein 3 OS=Homo sapiens GN=ZFH3 PE=1 SV=2 - [ZFH3_HUMAN]                         | 1.069 | 0.028 |
| Q7L4I2    | Arginine/serine-rich coiled-coil protein 2 OS=Homo sapiens GN=RSRC2 PE=1 SV=1 - [RSRC2_HUMAN]           | 1.070 | 0.020 |
| Q15365    | Poly(rC)-binding protein 1 OS=Homo sapiens GN=PCBP1 PE=1 SV=2 - [PCBP1_HUMAN]                           | 1.072 | 0.010 |
| Q8NFD5    | AT-rich interactive domain-containing protein 1B OS=Homo sapiens GN=ARID1B PE=1 SV=2 - [ARI1B_HUMAN]    | 1.072 | 0.039 |
| Q16222-2  | Isoform AGX1 of UDP-N-acetylhexosamine pyrophosphorylase OS=Homo sapiens GN=UAP1 - [UAP1_HUMAN]         | 1.074 | 0.015 |
| Q92541    | RNA polymerase-associated protein RTF1 homolog OS=Homo sapiens GN=RTF1 PE=1 SV=4 - [RTF1_HUMAN]         | 1.075 | 0.018 |
| Q96DX4    | RING finger and SPRY domain-containing protein 1 OS=Homo sapiens GN=RSPRY1 PE=2 SV=1 - [RSPRY_HUMAN]    | 1.076 | 0.024 |
| Q9H497    | Torsin-3A OS=Homo sapiens GN=TOR3A PE=1 SV=1 - [TOR3A_HUMAN]                                            | 1.076 | 0.045 |
| Q13574-2  | Isoform 2 of Diacylglycerol kinase zeta OS=Homo sapiens GN=DGKZ - [DGKZ_HUMAN]                          | 1.076 | 0.000 |
| Q96N67-4  | Isoform 4 of Dedicator of cytokinesis protein 7 OS=Homo sapiens GN=DOCK7 - [DOCK7_HUMAN]                | 1.078 | 0.044 |
| Q7Z3T8    | Zinc finger FYVE domain-containing protein 16 OS=Homo sapiens GN=ZFYVE16 PE=1 SV=3 - [ZFY16_HUMAN]      | 1.078 | 0.050 |
| Q14654    | ATP-sensitive inward rectifier potassium channel 11 OS=Homo sapiens GN=KCNJ11 PE=1 SV=2 - [IRK11_HUMAN] | 1.079 | 0.015 |
| Q9P2G1    | Ankyrin repeat and IBR domain-containing protein 1 OS=Homo sapiens GN=ANKIB1 PE=1 SV=3 - [AKIB1_HUMAN]  | 1.079 | 0.019 |

|          |                                                                                                       |       |       |
|----------|-------------------------------------------------------------------------------------------------------|-------|-------|
| Q69YN2   | CWF19-like protein 1 OS=Homo sapiens GN=CWF19L1 PE=1 SV=2 - [C19L1_HUMAN]                             | 1.081 | 0.022 |
| P02760   | Protein AMBP OS=Homo sapiens GN=AMBP PE=1 SV=1 - [AMBP_HUMAN]                                         | 1.081 | 0.026 |
| O00151   | PDZ and LIM domain protein 1 OS=Homo sapiens GN=PDLIM1 PE=1 SV=4 - [PDL1_HUMAN]                       | 1.082 | 0.027 |
| P27701   | CD82 antigen OS=Homo sapiens GN=CD82 PE=1 SV=1 - [CD82_HUMAN]                                         | 1.083 | 0.023 |
| P62314   | Small nuclear ribonucleoprotein Sm D1 OS=Homo sapiens GN=SNRPD1 PE=1 SV=1 - [SMD1_HUMAN]              | 1.085 | 0.023 |
| O75113   | NEDD4-binding protein 1 OS=Homo sapiens GN=N4BP1 PE=1 SV=4 - [N4BP1_HUMAN]                            | 1.086 | 0.046 |
| P49760-3 | Isoform 3 of Dual specificity protein kinase CLK2 OS=Homo sapiens GN=CLK2 - [CLK2_HUMAN]              | 1.089 | 0.024 |
| Q5TA45-2 | Isoform 2 of Integrator complex subunit 11 OS=Homo sapiens GN=CPSF3L - [INT11_HUMAN]                  | 1.090 | 0.046 |
| Q6AZY7-2 | Isoform 2 of Scavenger receptor class A member 3 OS=Homo sapiens GN=SCARA3 - [SCAR3_HUMAN]            | 1.090 | 0.022 |
| Q9H3H1-4 | Isoform 4 of tRNA dimethylallyltransferase, mitochondrial OS=Homo sapiens GN=TRIT1 - [MOD5_HUMAN]     | 1.091 | 0.039 |
| Q9H0G5   | Nuclear speckle splicing regulatory protein 1 OS=Homo sapiens GN=NSRP1 PE=1 SV=1 - [NSRP1_HUMAN]      | 1.092 | 0.029 |
| Q96F10   | Diamine acetyltransferase 2 OS=Homo sapiens GN=SAT2 PE=1 SV=1 - [SAT2_HUMAN]                          | 1.092 | 0.037 |
| O94880-2 | Isoform 2 of PHD finger protein 14 OS=Homo sapiens GN=PHF14 - [PHF14_HUMAN]                           | 1.093 | 0.047 |
| Q6NTF9   | Rhomboid domain-containing protein 2 OS=Homo sapiens GN=RHBDD2 PE=2 SV=2 - [RHBD2_HUMAN]              | 1.094 | 0.038 |
| Q9BVJ7   | Dual specificity protein phosphatase 23 OS=Homo sapiens GN=DUSP23 PE=1 SV=1 - [DUS23_HUMAN]           | 1.094 | 0.046 |
| P46779   | 60S ribosomal protein L28 OS=Homo sapiens GN=RPL28 PE=1 SV=3 - [RL28_HUMAN]                           | 1.095 | 0.039 |
| Q9Y2G2-2 | Isoform 2 of Caspase recruitment domain-containing protein 8 OS=Homo sapiens GN=CARD8 - [CARD8_HUMAN] | 1.095 | 0.047 |
| O14972   | Down syndrome critical region protein 3 OS=Homo sapiens GN=DSCR3 PE=1 SV=1 - [DSCR3_HUMAN]            | 1.095 | 0.041 |
| Q92968   | Peroxisomal membrane protein PEX13 OS=Homo sapiens GN=PEX13 PE=1 SV=2 - [PEX13_HUMAN]                 | 1.096 | 0.034 |
| Q9ULV0   | Myosin-Vb OS=Homo sapiens GN=MYO5B PE=1 SV=3 - [MYO5B_HUMAN]                                          | 1.096 | 0.033 |
| P30419   | Glycylpeptide N-tetradecanoyltransferase 1 OS=Homo sapiens GN=NMT1 PE=1 SV=2 - [NMT1_HUMAN]           | 1.097 | 0.046 |
| O75467   | Zinc finger protein 324A OS=Homo sapiens GN=ZNF324 PE=1 SV=1 - [Z324A_HUMAN]                          | 1.098 | 0.029 |
| O60294   | Leucine carboxyl methyltransferase 2 OS=Homo sapiens GN=LCMT2 PE=1 SV=3 - [LCMT2_HUMAN]               | 1.100 | 0.044 |
| Q659A1   | NMDA receptor-regulated protein 2 OS=Homo sapiens GN=NARG2 PE=1 SV=2 - [NARG2_HUMAN]                  | 1.100 | 0.038 |
| Q9H061   | Transmembrane protein 126A OS=Homo sapiens GN=TMEM126A PE=1 SV=1 - [T126A_HUMAN]                      | 1.101 | 0.030 |
| Q96SZ5   | 2-aminoethanethiol dioxygenase OS=Homo sapiens GN=ADO PE=1 SV=2 - [AEDO_HUMAN]                        | 1.101 | 0.040 |
| Q9BRS2   | Serine/threonine-protein kinase RIO1 OS=Homo sapiens GN=RIOK1 PE=1 SV=2 - [RIOK1_HUMAN]               | 1.103 | 0.024 |
| Q4KMP7   | TBC1 domain family member 10B OS=Homo sapiens GN=TBC1D10B PE=1 SV=3 - [TB10B_HUMAN]                   | 1.104 | 0.030 |
| Q6PJW8-2 | Isoform 2 of Consortin OS=Homo sapiens GN=CNST - [CNST_HUMAN]                                         | 1.105 | 0.025 |

|          |                                                                                                                    |       |       |
|----------|--------------------------------------------------------------------------------------------------------------------|-------|-------|
| Q9GZNI   | Actin-related protein 6 OS=Homo sapiens GN=ACTR6 PE=1 SV=1 - [ARP6_HUMAN]                                          | 1.106 | 0.046 |
| Q9UBN7   | Histone deacetylase 6 OS=Homo sapiens GN=HDAC6 PE=1 SV=2 - [HDAC6_HUMAN]                                           | 1.107 | 0.045 |
| Q12986   | Transcriptional repressor NF-X1 OS=Homo sapiens GN=NFX1 PE=1 SV=2 - [NFX1_HUMAN]                                   | 1.107 | 0.011 |
| P42680   | Tyrosine-protein kinase Tec OS=Homo sapiens GN=TEC PE=1 SV=2 - [TEC_HUMAN]                                         | 1.109 | 0.016 |
| Q9NW75-2 | Isoform 2 of G patch domain-containing protein 2 OS=Homo sapiens GN=GPATCH2 - [GPTC2_HUMAN]                        | 1.110 | 0.041 |
| Q92830   | Histone acetyltransferase KAT2A OS=Homo sapiens GN=KAT2A PE=1 SV=3 - [KAT2A_HUMAN]                                 | 1.111 | 0.026 |
| O15194-2 | Isoform 2 of CTD small phosphatase-like protein OS=Homo sapiens GN=CTDSPL - [CTDSL_HUMAN]                          | 1.113 | 0.045 |
| Q15223   | Poliovirus receptor-related protein 1 OS=Homo sapiens GN=PVRL1 PE=1 SV=3 - [PVRL1_HUMAN]                           | 1.114 | 0.005 |
| O43505   | N-acetyllactosaminide beta-1,3-N-acetylglucosaminyltransferase OS=Homo sapiens GN=B3GNT1 PE=1 SV=1 - [B3GN1_HUMAN] | 1.115 | 0.043 |
| Q92733   | Proline-rich protein PRCC OS=Homo sapiens GN=PRCC PE=1 SV=1 - [PRCC_HUMAN]                                         | 1.116 | 0.025 |
| Q13425   | Beta-2-syntrophin OS=Homo sapiens GN=SNTB2 PE=1 SV=1 - [SNTB2_HUMAN]                                               | 1.116 | 0.036 |
| Q9BX95   | Sphingosine-1-phosphate phosphatase 1 OS=Homo sapiens GN=SGPP1 PE=1 SV=2 - [SGPP1_HUMAN]                           | 1.117 | 0.021 |
| P59780   | AP-3 complex subunit sigma-2 OS=Homo sapiens GN=AP3S2 PE=2 SV=1 - [AP3S2_HUMAN]                                    | 1.121 | 0.034 |
| Q9BVC5   | Ashwin OS=Homo sapiens GN=C2orf49 PE=1 SV=1 - [ASHWN_HUMAN]                                                        | 1.126 | 0.038 |
| P61313   | 60S ribosomal protein L15 OS=Homo sapiens GN=RPL15 PE=1 SV=2 - [RL15_HUMAN]                                        | 1.127 | 0.017 |
| Q9NXN4-2 | Isoform 2 of Ganglioside-induced differentiation-associated protein 2 OS=Homo sapiens GN=GDAP2 - [GDAP2_HUMAN]     | 1.127 | 0.003 |
| O00268   | Transcription initiation factor TFIID subunit 4 OS=Homo sapiens GN=TAF4 PE=1 SV=2 - [TAF4_HUMAN]                   | 1.129 | 0.029 |
| O00628   | Peroxisomal targeting signal 2 receptor OS=Homo sapiens GN=PEX7 PE=1 SV=1 - [PEX7_HUMAN]                           | 1.136 | 0.027 |
| Q96PQ7   | Kelch-like protein 5 OS=Homo sapiens GN=KLHL5 PE=2 SV=3 - [KLHL5_HUMAN]                                            | 1.136 | 0.008 |
| Q86VR2   | Protein FAM134C OS=Homo sapiens GN=FAM134C PE=1 SV=1 - [F134C_HUMAN]                                               | 1.140 | 0.020 |
| P32121-2 | Isoform 3 of Beta-arrestin-2 OS=Homo sapiens GN=ARRB2 - [ARRB2_HUMAN]                                              | 1.141 | 0.004 |
| Q9NQG7-2 | Isoform 2 of Hermansky-Pudlak syndrome 4 protein OS=Homo sapiens GN=HPS4 - [HPS4_HUMAN]                            | 1.142 | 0.036 |
| Q9H7X7-2 | Isoform 2 of Rab-like protein 5 OS=Homo sapiens GN=RABL5 - [RABL5_HUMAN]                                           | 1.145 | 0.039 |
| Q9UQR0   | Sex comb on midleg-like protein 2 OS=Homo sapiens GN=SCML2 PE=1 SV=1 - [SCML2_HUMAN]                               | 1.145 | 0.023 |
| Q9C029-3 | Isoform 2 of Tripartite motif-containing protein 7 OS=Homo sapiens GN=TRIM7 - [TRIM7_HUMAN]                        | 1.147 | 0.041 |
| O94916-2 | Isoform A of Nuclear factor of activated T-cells 5 OS=Homo sapiens GN=NFAT5 - [NFAT5_HUMAN]                        | 1.149 | 0.038 |
| Q5T8P6-6 | Isoform 6 of RNA-binding protein 26 OS=Homo sapiens GN=RBM26 - [RBM26_HUMAN]                                       | 1.149 | 0.048 |
| Q14494-2 | Isoform 2 of Nuclear factor erythroid 2-related factor 1 OS=Homo sapiens GN=NFE2L1 - [NF2L1_HUMAN]                 | 1.152 | 0.031 |
| Q9NU19   | TBC1 domain family member 22B OS=Homo sapiens GN=TBC1D22B PE=1 SV=3 - [TB22B_HUMAN]                                | 1.153 | 0.049 |

|          |                                                                                                                     |       |       |
|----------|---------------------------------------------------------------------------------------------------------------------|-------|-------|
| Q9BT25-2 | Isoform 2 of HAUS augmin-like complex subunit 8 OS=Homo sapiens GN=HAUS8 - [HAUS8_HUMAN]                            | 1.157 | 0.037 |
| P27930-2 | Isoform Short of Interleukin-1 receptor type 2 OS=Homo sapiens GN=IL1R2 - [IL1R2_HUMAN]                             | 1.158 | 0.044 |
| Q9Y256   | CAAX prenyl protease 2 OS=Homo sapiens GN=RCE1 PE=1 SV=1 - [FACE2_HUMAN]                                            | 1.158 | 0.047 |
| Q9P2Q2   | FERM domain-containing protein 4A OS=Homo sapiens GN=FRMD4A PE=1 SV=3 - [FRM4A_HUMAN]                               | 1.158 | 0.010 |
| Q6P444   | Protein FAM54A OS=Homo sapiens GN=FAM54A PE=2 SV=2 - [FA54A_HUMAN]                                                  | 1.162 | 0.030 |
| Q99758   | ATP-binding cassette sub-family A member 3 OS=Homo sapiens GN=ABCA3 PE=1 SV=2 - [ABCA3_HUMAN]                       | 1.164 | 0.021 |
| O15169-2 | Isoform 2 of Axin-1 OS=Homo sapiens GN=AXIN1 - [AXIN1_HUMAN]                                                        | 1.166 | 0.040 |
| Q9BUK0   | Coiled-coil-helix-coiled-coil-helix domain-containing protein 7 OS=Homo sapiens GN=CHCHD7 PE=2 SV=1 - [CHCH7_HUMAN] | 1.174 | 0.045 |
| O14519   | Cyclin-dependent kinase 2-associated protein 1 OS=Homo sapiens GN=CDK2AP1 PE=1 SV=1 - [CDKA1_HUMAN]                 | 1.176 | 0.027 |
| Q8IWY9-1 | Isoform 1 of Codanin-1 OS=Homo sapiens GN=CDAN1 - [CDAN1_HUMAN]                                                     | 1.177 | 0.029 |
| Q9NSA3   | Beta-catenin-interacting protein 1 OS=Homo sapiens GN=CTNNBIP1 PE=1 SV=1 - [CNBP1_HUMAN]                            | 1.184 | 0.032 |
| Q9H2G9   | Golgin-45 OS=Homo sapiens GN=BLZF1 PE=1 SV=2 - [GO45_HUMAN]                                                         | 1.190 | 0.039 |
| Q9NPI8   | Fanconi anemia group F protein OS=Homo sapiens GN=FANCF PE=1 SV=1 - [FANCF_HUMAN]                                   | 1.191 | 0.021 |
| Q12805-2 | Isoform 2 of EGF-containing fibulin-like extracellular matrix protein 1 OS=Homo sapiens GN=EFEMP1 - [FBLN3_HUMAN]   | 1.195 | 0.012 |
| P35527   | Keratin, type I cytoskeletal 9 OS=Homo sapiens GN=KRT9 PE=1 SV=3 - [K1C9_HUMAN]                                     | 1.197 | 0.039 |
| Q8TB52   | F-box only protein 30 OS=Homo sapiens GN=FBXO30 PE=1 SV=3 - [FBX30_HUMAN]                                           | 1.199 | 0.046 |
| Q96RT8   | Gamma-tubulin complex component 5 OS=Homo sapiens GN=TUBGCP5 PE=1 SV=1 - [GCP5_HUMAN]                               | 1.203 | 0.011 |
| Q12983   | BCL2/adenovirus E1B 19 kDa protein-interacting protein 3 OS=Homo sapiens GN=BNIP3 PE=1 SV=2 - [BNIP3_HUMAN]         | 1.204 | 0.008 |
| P55197   | Protein AF-10 OS=Homo sapiens GN=MLLT10 PE=1 SV=1 - [AF10_HUMAN]                                                    | 1.215 | 0.009 |
| Q9H7E9   | UPF0488 protein C8orf33 OS=Homo sapiens GN=C8orf33 PE=1 SV=1 - [CH033_HUMAN]                                        | 1.219 | 0.044 |
| P08670   | Vimentin OS=Homo sapiens GN=VIM PE=1 SV=4 - [VIME_HUMAN]                                                            | 1.226 | 0.027 |
| Q14296   | Fas-activated serine/threonine kinase OS=Homo sapiens GN=FASTK PE=1 SV=1 - [FASTK_HUMAN]                            | 1.228 | 0.023 |
| Q86YD1-3 | Isoform 3 of Prostate tumor-overexpressed gene 1 protein OS=Homo sapiens GN=PTOV1 - [PTOV1_HUMAN]                   | 1.229 | 0.025 |
| Q99985   | Semaphorin-3C OS=Homo sapiens GN=SEMA3C PE=1 SV=2 - [SEM3C_HUMAN]                                                   | 1.230 | 0.012 |
| Q8N394   | Transmembrane and TPR repeat-containing protein 2 OS=Homo sapiens GN=TMTC2 PE=2 SV=1 - [TMTC2_HUMAN]                | 1.232 | 0.040 |
| Q15413-3 | Isoform 3 of Ryanodine receptor 3 OS=Homo sapiens GN=RYSR3 - [RYSR3_HUMAN]                                          | 1.243 | 0.011 |
| P00973-2 | Isoform p41 of 2'-5'-oligoadenylate synthase 1 OS=Homo sapiens GN=OAS1 - [OAS1_HUMAN]                               | 1.245 | 0.005 |
| Q9Y6B6   | GTP-binding protein SAR1b OS=Homo sapiens GN=SAR1B PE=1 SV=1 - [SAR1B_HUMAN]                                        | 1.246 | 0.030 |
| Q13795   | ADP-ribosylation factor-related protein 1 OS=Homo sapiens GN=ARFRP1 PE=1 SV=1 - [ARFRP_HUMAN]                       | 1.247 | 0.047 |

|                                                 |                                                                                                         |       |       |
|-------------------------------------------------|---------------------------------------------------------------------------------------------------------|-------|-------|
| P13611-2                                        | Isoform V1 of Versican core protein OS=Homo sapiens GN=VCAN - [CSPG2_HUMAN]                             | 1.254 | 0.044 |
| Q8IYN2                                          | Transcription elongation factor A protein-like 8 OS=Homo sapiens GN=TCEAL8 PE=2 SV=1 - [TCAL8_HUMAN]    | 1.257 | 0.043 |
| O00506                                          | Serine/threonine-protein kinase 25 OS=Homo sapiens GN=STK25 PE=1 SV=1 - [STK25_HUMAN]                   | 1.260 | 0.036 |
| Q5SWA1                                          | Protein phosphatase 1 regulatory subunit 15B OS=Homo sapiens GN=PPP1R15B PE=1 SV=1 - [PR15B_HUMAN]      | 1.263 | 0.016 |
| Q13164-2                                        | Isoform 2 of Mitogen-activated protein kinase 7 OS=Homo sapiens GN=MAPK7 - [MK07_HUMAN]                 | 1.272 | 0.030 |
| O43542                                          | DNA repair protein XRCC3 OS=Homo sapiens GN=XRCC3 PE=1 SV=1 - [XRCC3_HUMAN]                             | 1.272 | 0.013 |
| O60930                                          | Ribonuclease H1 OS=Homo sapiens GN=RNASEH1 PE=1 SV=2 - [RNH1_HUMAN]                                     | 1.274 | 0.026 |
| O15040                                          | Tectonin beta-propeller repeat-containing protein 2 OS=Homo sapiens GN=TECPR2 PE=1 SV=4 - [TCPR2_HUMAN] | 1.276 | 0.000 |
| O15055                                          | Period circadian protein homolog 2 OS=Homo sapiens GN=PER2 PE=1 SV=2 - [PER2_HUMAN]                     | 1.277 | 0.006 |
| Q9P2W1                                          | Homologous-pairing protein 2 homolog OS=Homo sapiens GN=PSMC3IP PE=1 SV=1 - [HOP2_HUMAN]                | 1.289 | 0.030 |
| Q6DCA0                                          | AMMECR1-like protein OS=Homo sapiens GN=AMMECR1L PE=1 SV=1 - [AMERL_HUMAN]                              | 1.291 | 0.009 |
| Q9NQ34                                          | Transmembrane protein 9B OS=Homo sapiens GN=TMEM9B PE=1 SV=1 - [TMM9B_HUMAN]                            | 1.317 | 0.044 |
| Q96S15-2                                        | Isoform 2 of WD repeat-containing protein 24 OS=Homo sapiens GN=WDR24 - [WDR24_HUMAN]                   | 1.318 | 0.040 |
| Q9Y6M4-3                                        | Isoform 3 of Casein kinase I isoform gamma-3 OS=Homo sapiens GN=CSNK1G3 - [KC1G3_HUMAN]                 | 1.320 | 0.040 |
| P15923-2                                        | Isoform E47 of Transcription factor E2-alpha OS=Homo sapiens GN=TCF3 - [TFE2_HUMAN]                     | 1.322 | 0.017 |
| Q562F6-2                                        | Isoform 2 of Shugoshin-like 2 OS=Homo sapiens GN=SGOL2 - [SGOL2_HUMAN]                                  | 1.354 | 0.030 |
| P49447                                          | Cytochrome b561 OS=Homo sapiens GN=CYB561 PE=2 SV=2 - [CY561_HUMAN]                                     | 1.359 | 0.043 |
| Q99715-4                                        | Isoform 4 of Collagen alpha-1(XII) chain OS=Homo sapiens GN=COL12A1 - [COCA1_HUMAN]                     | 1.368 | 0.042 |
| O14628-4                                        | Isoform 4 of Zinc finger protein 195 OS=Homo sapiens GN=ZNF195 - [ZN195_HUMAN]                          | 1.440 | 0.040 |
| Q08043                                          | Alpha-actinin-3 OS=Homo sapiens GN=ACTN3 PE=1 SV=2 - [ACTN3_HUMAN]                                      | 1.453 | 0.009 |
| P36894                                          | Bone morphogenetic protein receptor type-1A OS=Homo sapiens GN=BMPR1A PE=1 SV=2 - [BMR1A_HUMAN]         | 1.533 | 0.023 |
| P53667-2                                        | Isoform 2 of LIM domain kinase 1 OS=Homo sapiens GN=LIMK1 - [LIMK1_HUMAN]                               | 1.581 | 0.014 |
| Q9UBT7-2                                        | Isoform 2 of Alpha-catulin OS=Homo sapiens GN=CTNNAL1 - [CTNL1_HUMAN]                                   | 1.610 | 0.013 |
| Q8IYH5-2                                        | Isoform 2 of ZZ-type zinc finger-containing protein 3 OS=Homo sapiens GN=ZZZ3 - [ZZZ3_HUMAN]            | 1.942 | 0.037 |
| <b>H727 - 6 hours lanreotide (205 proteins)</b> |                                                                                                         |       |       |
| Q8N0X2-4                                        | Isoform 4 of Sperm-associated antigen 16 protein OS=Homo sapiens GN=SPAG16 - [SPG16_HUMAN]              | 0.106 | 0.000 |
| O76027                                          | Annexin A9 OS=Homo sapiens GN=ANXA9 PE=1 SV=3 - [ANXA9_HUMAN]                                           | 0.419 | 0.039 |
| P11926                                          | Ornithine decarboxylase OS=Homo sapiens GN=ODC1 PE=1 SV=2 - [DCOR_HUMAN]                                | 0.527 | 0.005 |

|          |                                                                                                                                                       |       |       |
|----------|-------------------------------------------------------------------------------------------------------------------------------------------------------|-------|-------|
| Q92802   | NEDD4-binding protein 2-like 2 OS=Homo sapiens GN=N4BP2L2 PE=1 SV=1 - [N42L2_HUMAN]                                                                   | 0.551 | 0.045 |
| Q9H8M1   | Coenzyme Q-binding protein COQ10 homolog B, mitochondrial OS=Homo sapiens GN=COQ10B PE=2 SV=1 - [CQ10B_HUMAN]                                         | 0.625 | 0.021 |
| P18847   | Cyclic AMP-dependent transcription factor ATF-3 OS=Homo sapiens GN=ATF3 PE=1 SV=2 - [ATF3_HUMAN]                                                      | 0.628 | 0.049 |
| O75382-3 | Isoform Gamma of Tripartite motif-containing protein 3 OS=Homo sapiens GN=TRIM3 - [TRIM3_HUMAN]                                                       | 0.653 | 0.019 |
| Q15011-3 | Isoform 3 of Homocysteine-responsive endoplasmic reticulum-resident ubiquitin-like domain member 1 protein OS=Homo sapiens GN=HERPUD1 - [HERP1_HUMAN] | 0.682 | 0.042 |
| Q96DN5-2 | Isoform 2 of WD repeat-containing protein 67 OS=Homo sapiens GN=WDR67 - [WDR67_HUMAN]                                                                 | 0.723 | 0.024 |
| Q99576-4 | Isoform 3 of TSC22 domain family protein 3 OS=Homo sapiens GN=TSC22D3 - [T22D3_HUMAN]                                                                 | 0.728 | 0.001 |
| Q71DI3   | Histone H3.2 OS=Homo sapiens GN=HIST2H3A PE=1 SV=3 - [H32_HUMAN]                                                                                      | 0.728 | 0.049 |
| Q9H0X9   | Oxysterol-binding protein-related protein 5 OS=Homo sapiens GN=OSBPL5 PE=1 SV=1 - [OSBL5_HUMAN]                                                       | 0.740 | 0.011 |
| O60907-2 | Isoform 2 of F-box-like/WD repeat-containing protein TBL1X OS=Homo sapiens GN=TBL1X - [TBL1X_HUMAN]                                                   | 0.753 | 0.042 |
| P53667-2 | Isoform 2 of LIM domain kinase 1 OS=Homo sapiens GN=LIMK1 - [LIMK1_HUMAN]                                                                             | 0.772 | 0.034 |
| Q9H3U5-2 | Isoform 2 of Major facilitator superfamily domain-containing protein 1 OS=Homo sapiens GN=MFSD1 - [MFSD1_HUMAN]                                       | 0.784 | 0.049 |
| O43246   | Cationic amino acid transporter 4 OS=Homo sapiens GN=SLC7A4 PE=2 SV=3 - [CTR4_HUMAN]                                                                  | 0.791 | 0.008 |
| Q08AN1   | Zinc finger protein 616 OS=Homo sapiens GN=ZNF616 PE=2 SV=2 - [ZN616_HUMAN]                                                                           | 0.827 | 0.048 |
| P19532   | Transcription factor E3 OS=Homo sapiens GN=TFE3 PE=1 SV=4 - [TFE3_HUMAN]                                                                              | 0.829 | 0.042 |
| Q5T7W0-3 | Isoform 3 of Zinc finger protein 618 OS=Homo sapiens GN=ZNF618 - [ZN618_HUMAN]                                                                        | 0.830 | 0.027 |
| Q9NUE0   | Palmitoyltransferase ZDHHC18 OS=Homo sapiens GN=ZDHHC18 PE=2 SV=2 - [ZDH18_HUMAN]                                                                     | 0.832 | 0.035 |
| P42685   | Tyrosine-protein kinase FRK OS=Homo sapiens GN=FRK PE=1 SV=1 - [FRK_HUMAN]                                                                            | 0.839 | 0.017 |
| P17275   | Transcription factor jun-B OS=Homo sapiens GN=JUNB PE=1 SV=1 - [JUNB_HUMAN]                                                                           | 0.845 | 0.039 |
| Q3MIT2   | Putative tRNA pseudouridine synthase Pus10 OS=Homo sapiens GN=PUS10 PE=1 SV=1 - [PUS10_HUMAN]                                                         | 0.845 | 0.041 |
| Q8IYU4-2 | Isoform 2 of Ubiquilin-like protein OS=Homo sapiens GN=UBQLNL - [UBQLN_HUMAN]                                                                         | 0.854 | 0.037 |
| Q08495   | Dematin OS=Homo sapiens GN=EPB49 PE=1 SV=3 - [DEMA_HUMAN]                                                                                             | 0.855 | 0.023 |
| P43007   | Neutral amino acid transporter A OS=Homo sapiens GN=SLC1A4 PE=1 SV=1 - [SATT_HUMAN]                                                                   | 0.859 | 0.014 |
| Q07866-3 | Isoform G of Kinesin light chain 1 OS=Homo sapiens GN=KLC1 - [KLC1_HUMAN]                                                                             | 0.859 | 0.041 |
| Q2M3G4-2 | Isoform 2 of Protein Shroom1 OS=Homo sapiens GN=SHROOM1 - [SHRM1_HUMAN]                                                                               | 0.860 | 0.043 |
| Q969S8-2 | Isoform 2 of Histone deacetylase 10 OS=Homo sapiens GN=HDAC10 - [HDA10_HUMAN]                                                                         | 0.861 | 0.040 |
| Q8N1P7   | Absent in melanoma 1-like protein OS=Homo sapiens GN=AIM1L PE=2 SV=1 - [AIM1L_HUMAN]                                                                  | 0.867 | 0.013 |
| O75054   | Immunoglobulin superfamily member 3 OS=Homo sapiens GN=IGSF3 PE=1 SV=3 - [IGSF3_HUMAN]                                                                | 0.870 | 0.008 |
| Q9Y6K5   | 2'-5'-oligoadenylate synthase 3 OS=Homo sapiens GN=OAS3 PE=1 SV=3 - [OAS3_HUMAN]                                                                      | 0.873 | 0.044 |

|          |                                                                                                                              |       |       |
|----------|------------------------------------------------------------------------------------------------------------------------------|-------|-------|
| Q9C0D6   | FH2 domain-containing protein 1 OS=Homo sapiens GN=FHDC1 PE=2 SV=2 - [FHDC1_HUMAN]                                           | 0.875 | 0.019 |
| Q96EN8   | Molybdenum cofactor sulfurase OS=Homo sapiens GN=MOCOS PE=1 SV=2 - [MOCOS_HUMAN]                                             | 0.877 | 0.012 |
| P31146   | Coronin-1A OS=Homo sapiens GN=CORO1A PE=1 SV=4 - [COR1A_HUMAN]                                                               | 0.880 | 0.014 |
| P55210-2 | Isoform Beta of Caspase-7 OS=Homo sapiens GN=CASP7 - [CASP7_HUMAN]                                                           | 0.883 | 0.042 |
| P15121   | Aldose reductase OS=Homo sapiens GN=AKR1B1 PE=1 SV=3 - [ALDR_HUMAN]                                                          | 0.883 | 0.023 |
| Q9UIK4   | Death-associated protein kinase 2 OS=Homo sapiens GN=DAPK2 PE=1 SV=1 - [DAPK2_HUMAN]                                         | 0.886 | 0.049 |
| Q8TEY7-2 | Isoform 2 of Ubiquitin carboxyl-terminal hydrolase 33 OS=Homo sapiens GN=USP33 - [UBP33_HUMAN]                               | 0.893 | 0.002 |
| Q4VC44   | FLYWCH-type zinc finger-containing protein 1 OS=Homo sapiens GN=FLYWCH1 PE=1 SV=2 - [FWCH1_HUMAN]                            | 0.899 | 0.018 |
| Q9BR77   | Coiled-coil domain-containing protein 77 OS=Homo sapiens GN=CCDC77 PE=2 SV=1 - [CCD77_HUMAN]                                 | 0.899 | 0.046 |
| Q9UNA1-2 | Isoform 2 of Rho GTPase-activating protein 26 OS=Homo sapiens GN=ARHGAP26 - [RHG26_HUMAN]                                    | 0.899 | 0.000 |
| P07711   | Cathepsin L1 OS=Homo sapiens GN=CTSL1 PE=1 SV=2 - [CATL1_HUMAN]                                                              | 0.901 | 0.019 |
| P21953   | 2-oxoisovalerate dehydrogenase subunit beta, mitochondrial OS=Homo sapiens GN=BCKDHB PE=1 SV=2 - [ODBB_HUMAN]                | 0.901 | 0.030 |
| Q5VWZ2-2 | Isoform 2 of Lysophospholipase-like protein 1 OS=Homo sapiens GN=LYPLAL1 - [LYPL1_HUMAN]                                     | 0.902 | 0.003 |
| O60858   | E3 ubiquitin-protein ligase TRIM13 OS=Homo sapiens GN=TRIM13 PE=1 SV=2 - [TRI13_HUMAN]                                       | 0.903 | 0.043 |
| P55789   | FAD-linked sulfhydryl oxidase ALR OS=Homo sapiens GN=GFER PE=1 SV=2 - [ALR_HUMAN]                                            | 0.906 | 0.035 |
| P16144-4 | Isoform Beta-4D of Integrin beta-4 OS=Homo sapiens GN=ITGB4 - [ITB4_HUMAN]                                                   | 0.907 | 0.037 |
| Q9P0J1   | [Pyruvate dehydrogenase [acetyl-transferring]]-phosphatase 1, mitochondrial OS=Homo sapiens GN=PDP1 PE=1 SV=3 - [PDP1_HUMAN] | 0.908 | 0.049 |
| Q86SQ7-3 | Isoform 3 of Serologically defined colon cancer antigen 8 OS=Homo sapiens GN=SDCCAG8 - [SDCG8_HUMAN]                         | 0.910 | 0.047 |
| Q9UI14   | Prenylated Rab acceptor protein 1 OS=Homo sapiens GN=RABAC1 PE=1 SV=1 - [PRAF1_HUMAN]                                        | 0.911 | 0.035 |
| Q969E8   | Pre-rRNA-processing protein TSR2 homolog OS=Homo sapiens GN=TSR2 PE=1 SV=1 - [TSR2_HUMAN]                                    | 0.912 | 0.027 |
| Q9HBU6   | Ethanolamine kinase 1 OS=Homo sapiens GN=ETNK1 PE=1 SV=1 - [EKI1_HUMAN]                                                      | 0.914 | 0.031 |
| P53634   | Dipeptidyl peptidase 1 OS=Homo sapiens GN=CTSC PE=1 SV=2 - [CATC_HUMAN]                                                      | 0.915 | 0.031 |
| Q2TAA2   | Isoamyl acetate-hydrolyzing esterase 1 homolog OS=Homo sapiens GN=IAH1 PE=1 SV=1 - [IAH1_HUMAN]                              | 0.917 | 0.012 |
| O14727-3 | Isoform 3 of Apoptotic protease-activating factor 1 OS=Homo sapiens GN=APAF1 - [APAF_HUMAN]                                  | 0.917 | 0.022 |
| O95372   | Acyl-protein thioesterase 2 OS=Homo sapiens GN=LYPLA2 PE=1 SV=1 - [LYPA2_HUMAN]                                              | 0.918 | 0.026 |
| Q08AG7   | Mitotic-spindle organizing protein 1 OS=Homo sapiens GN=MZT1 PE=1 SV=2 - [MZT1_HUMAN]                                        | 0.919 | 0.033 |
| P82914   | 28S ribosomal protein S15, mitochondrial OS=Homo sapiens GN=MRPS15 PE=1 SV=1 - [RT15_HUMAN]                                  | 0.919 | 0.010 |
| A8MPS7   | UPF0249 protein ydjC homolog OS=Homo sapiens GN=YDJC PE=2 SV=1 - [YDJC_HUMAN]                                                | 0.923 | 0.025 |
| A6NJ78   | Probable methyltransferase-like protein 15 OS=Homo sapiens GN=METT15 PE=2 SV=1 - [MET15_HUMAN]                               | 0.923 | 0.020 |



|          |                                                                                                                            |       |       |
|----------|----------------------------------------------------------------------------------------------------------------------------|-------|-------|
| Q9UBN7   | Histone deacetylase 6 OS=Homo sapiens GN=HDAC6 PE=1 SV=2 - [HDAC6_HUMAN]                                                   | 0.924 | 0.044 |
| Q9BWM7   | Sideroflexin-3 OS=Homo sapiens GN=SFXN3 PE=2 SV=2 - [SFXN3_HUMAN]                                                          | 0.925 | 0.003 |
| Q9UJS0   | Calcium-binding mitochondrial carrier protein Aralar2 OS=Homo sapiens GN=SLC25A13 PE=1 SV=2 - [CMC2_HUMAN]                 | 0.925 | 0.023 |
| Q7Z3D6-4 | Isoform 4 of UPF0317 protein C14orf159, mitochondrial OS=Homo sapiens GN=C14orf159 - [CN159_HUMAN]                         | 0.926 | 0.037 |
| P35237   | Serpin B6 OS=Homo sapiens GN=SERPINB6 PE=1 SV=3 - [SPB6_HUMAN]                                                             | 0.927 | 0.032 |
| P09467   | Fructose-1,6-bisphosphatase 1 OS=Homo sapiens GN=FBP1 PE=1 SV=5 - [F16P1_HUMAN]                                            | 0.927 | 0.035 |
| Q6ZS17-2 | Isoform 2 of Protein FAM65A OS=Homo sapiens GN=FAM65A - [FA65A_HUMAN]                                                      | 0.927 | 0.039 |
| O15511   | Actin-related protein 2/3 complex subunit 5 OS=Homo sapiens GN=ARPC5 PE=1 SV=3 - [ARPC5_HUMAN]                             | 0.928 | 0.020 |
| O00165-5 | Isoform 5 of HCLS1-associated protein X-1 OS=Homo sapiens GN=HAX1 - [HAX1_HUMAN]                                           | 0.929 | 0.003 |
| O75396   | Vesicle-trafficking protein SEC22b OS=Homo sapiens GN=SEC22B PE=1 SV=4 - [SC22B_HUMAN]                                     | 0.929 | 0.030 |
| P35270   | Sepiapterin reductase OS=Homo sapiens GN=SPR PE=1 SV=1 - [SPRE_HUMAN]                                                      | 0.930 | 0.042 |
| Q8IWF6   | Protein FAM116A OS=Homo sapiens GN=FAM116A PE=2 SV=1 - [F116A_HUMAN]                                                       | 0.931 | 0.049 |
| Q9HBH1   | Peptide deformylase, mitochondrial OS=Homo sapiens GN=PDF PE=1 SV=1 - [DEFM_HUMAN]                                         | 0.931 | 0.045 |
| Q16706   | Alpha-mannosidase 2 OS=Homo sapiens GN=MAN2A1 PE=1 SV=2 - [MA2A1_HUMAN]                                                    | 0.932 | 0.016 |
| P13807   | Glycogen [starch] synthase, muscle OS=Homo sapiens GN=GYS1 PE=1 SV=2 - [GYS1_HUMAN]                                        | 0.932 | 0.034 |
| O75427   | Leucine-rich repeat and calponin homology domain-containing protein 4 OS=Homo sapiens GN=LRCH4 PE=1 SV=2 - [LRCH4_HUMAN]   | 0.935 | 0.016 |
| Q8WXS8-2 | Isoform B of A disintegrin and metalloproteinase with thrombospondin motifs 14 OS=Homo sapiens GN=ADAMTS14 - [ATS14_HUMAN] | 0.936 | 0.041 |
| Q9UFC0   | Leucine-rich repeat and WD repeat-containing protein 1 OS=Homo sapiens GN=LRWD1 PE=1 SV=2 - [LRWD1_HUMAN]                  | 0.936 | 0.023 |
| P51649   | Succinate-semialdehyde dehydrogenase, mitochondrial OS=Homo sapiens GN=ALDH5A1 PE=1 SV=2 - [SSDH_HUMAN]                    | 0.936 | 0.035 |
| Q8N7R7   | Cyclin-Y-like protein 1 OS=Homo sapiens GN=CCNYL1 PE=1 SV=2 - [CCYL1_HUMAN]                                                | 0.938 | 0.042 |
| P04040   | Catalase OS=Homo sapiens GN=CAT PE=1 SV=3 - [CATA_HUMAN]                                                                   | 0.938 | 0.031 |
| O96000   | NADH dehydrogenase [ubiquinone] 1 beta subcomplex subunit 10 OS=Homo sapiens GN=NDUFB10 PE=1 SV=3 - [NDUBA_HUMAN]          | 0.938 | 0.007 |
| O14795   | Protein unc-13 homolog B OS=Homo sapiens GN=UNC13B PE=1 SV=2 - [UN13B_HUMAN]                                               | 0.939 | 0.043 |
| Q05209   | Tyrosine-protein phosphatase non-receptor type 12 OS=Homo sapiens GN=PTPN12 PE=1 SV=3 - [PTN12_HUMAN]                      | 0.940 | 0.044 |
| Q9UHG3   | Prenylcysteine oxidase 1 OS=Homo sapiens GN=PCYOX1 PE=1 SV=3 - [PCYOX_HUMAN]                                               | 0.941 | 0.004 |
| Q9BPY3   | Protein FAM118B OS=Homo sapiens GN=FAM118B PE=1 SV=1 - [F118B_HUMAN]                                                       | 0.947 | 0.024 |
| P49281-2 | Isoform 1 of Natural resistance-associated macrophage protein 2 OS=Homo sapiens GN=SLC11A2 - [NRAM2_HUMAN]                 | 0.949 | 0.018 |
| O94973-2 | Isoform 2 of AP-2 complex subunit alpha-2 OS=Homo sapiens GN=AP2A2 - [AP2A2_HUMAN]                                         | 0.950 | 0.047 |
| P42765   | 3-ketoacyl-CoA thiolase, mitochondrial OS=Homo sapiens GN=ACAA2 PE=1 SV=2 - [THIM_HUMAN]                                   | 0.950 | 0.026 |

|          |                                                                                                                      |       |       |
|----------|----------------------------------------------------------------------------------------------------------------------|-------|-------|
| Q32P41   | tRNA (guanine(37)-N1)-methyltransferase OS=Homo sapiens GN=TRMT5 PE=1 SV=2 - [TRM5_HUMAN]                            | 0.951 | 0.050 |
| O15056-2 | Isoform 2B1 of Synaptojanin-2 OS=Homo sapiens GN=SYNJ2 - [SYNJ2_HUMAN]                                               | 0.951 | 0.028 |
| Q96AQ8   | Coiled-coil domain-containing protein 90A, mitochondrial OS=Homo sapiens GN=CCDC90A PE=2 SV=1 - [CC90A_HUMAN]        | 0.951 | 0.002 |
| Q9BV57   | 1,2-dihydroxy-3-keto-5-methylthiopentene dioxygenase OS=Homo sapiens GN=ADI1 PE=1 SV=1 - [MTND_HUMAN]                | 0.954 | 0.033 |
| P29350   | Tyrosine-protein phosphatase non-receptor type 6 OS=Homo sapiens GN=PTPN6 PE=1 SV=1 - [PTN6_HUMAN]                   | 0.956 | 0.028 |
| O43609   | Protein sprouty homolog 1 OS=Homo sapiens GN=SPRY1 PE=1 SV=2 - [SPY1_HUMAN]                                          | 0.957 | 0.000 |
| P43304   | Glycerol-3-phosphate dehydrogenase, mitochondrial OS=Homo sapiens GN=GPD2 PE=1 SV=3 - [GPDM_HUMAN]                   | 0.960 | 0.038 |
| Q9NRF8   | CTP synthase 2 OS=Homo sapiens GN=CTPS2 PE=1 SV=1 - [PYRG2_HUMAN]                                                    | 0.961 | 0.038 |
| Q9P2R7-2 | Isoform 2 of Succinyl-CoA ligase [ADP-forming] subunit beta, mitochondrial OS=Homo sapiens GN=SUCLA2 - [SUCB1_HUMAN] | 0.962 | 0.050 |
| Q9Y230   | RuvB-like 2 OS=Homo sapiens GN=RUVBL2 PE=1 SV=3 - [RUVB2_HUMAN]                                                      | 0.963 | 0.004 |
| P48634   | Protein PRRC2A OS=Homo sapiens GN=PRRC2A PE=1 SV=3 - [PRC2A_HUMAN]                                                   | 0.963 | 0.037 |
| P31150   | Rab GDP dissociation inhibitor alpha OS=Homo sapiens GN=GDI1 PE=1 SV=2 - [GDIA_HUMAN]                                | 0.964 | 0.031 |
| Q5ZPR3   | CD276 antigen OS=Homo sapiens GN=CD276 PE=1 SV=1 - [CD276_HUMAN]                                                     | 0.964 | 0.025 |
| Q9Y5K5-2 | Isoform 2 of Ubiquitin carboxyl-terminal hydrolase isozyme L5 OS=Homo sapiens GN=UCHL5 - [UCHL5_HUMAN]               | 0.964 | 0.049 |
| Q9Y296   | Trafficking protein particle complex subunit 4 OS=Homo sapiens GN=TRAPPC4 PE=1 SV=1 - [TPPC4_HUMAN]                  | 0.966 | 0.028 |
| Q13948   | Protein CASP OS=Homo sapiens GN=CUX1 PE=1 SV=2 - [CASP_HUMAN]                                                        | 0.970 | 0.005 |
| Q7Z3E2   | Uncharacterized protein C10orf118 OS=Homo sapiens GN=C10orf118 PE=2 SV=2 - [CJ118_HUMAN]                             | 0.973 | 0.029 |
| P28715   | DNA repair protein complementing XP-G cells OS=Homo sapiens GN=ERCC5 PE=1 SV=3 - [ERCC5_HUMAN]                       | 0.974 | 0.015 |
| Q8N5M1   | ATP synthase mitochondrial F1 complex assembly factor 2 OS=Homo sapiens GN=ATPAF2 PE=1 SV=1 - [ATPF2_HUMAN]          | 0.982 | 0.023 |
| Q9P265   | Disco-interacting protein 2 homolog B OS=Homo sapiens GN=DIP2B PE=1 SV=3 - [DIP2B_HUMAN]                             | 0.983 | 0.043 |
| Q8IXN7   | N-acetylaspartyl-glutamate synthetase A OS=Homo sapiens GN=RIMKLA PE=2 SV=2 - [RIMKA_HUMAN]                          | 0.984 | 0.030 |
| P07384   | Calpain-1 catalytic subunit OS=Homo sapiens GN=CAPN1 PE=1 SV=1 - [CAN1_HUMAN]                                        | 0.985 | 0.030 |
| O00268   | Transcription initiation factor TFIID subunit 4 OS=Homo sapiens GN=TAF4 PE=1 SV=2 - [TAF4_HUMAN]                     | 1.019 | 0.048 |
| Q09161   | Nuclear cap-binding protein subunit 1 OS=Homo sapiens GN=NCBP1 PE=1 SV=1 - [NCBP1_HUMAN]                             | 1.019 | 0.019 |
| Q9Y608-4 | Isoform 4 of Leucine-rich repeat flightless-interacting protein 2 OS=Homo sapiens GN=LRRFIP2 - [LRRF2_HUMAN]         | 1.024 | 0.036 |
| Q8TC07-2 | Isoform 2 of TBC1 domain family member 15 OS=Homo sapiens GN=TBC1D15 - [TBC15_HUMAN]                                 | 1.026 | 0.045 |
| P62330   | ADP-ribosylation factor 6 OS=Homo sapiens GN=ARF6 PE=1 SV=2 - [ARF6_HUMAN]                                           | 1.027 | 0.027 |
| P05556   | Integrin beta-1 OS=Homo sapiens GN=ITGB1 PE=1 SV=2 - [ITB1_HUMAN]                                                    | 1.029 | 0.026 |
| Q9BVC6   | Transmembrane protein 109 OS=Homo sapiens GN=TMEM109 PE=1 SV=1 - [TM109_HUMAN]                                       | 1.032 | 0.017 |

|          |                                                                                                                                                      |       |       |
|----------|------------------------------------------------------------------------------------------------------------------------------------------------------|-------|-------|
| Q6Y7W6   | PERQ amino acid-rich with GYF domain-containing protein 2 OS=Homo sapiens GN=GIGYF2 PE=1 SV=1 - [PERQ2_HUMAN]                                        | 1.037 | 0.021 |
| Q9Y2S0   | DNA-directed RNA polymerases I and III subunit RPAC2 OS=Homo sapiens GN=POLR1D PE=1 SV=1 - [RPAC2_HUMAN]                                             | 1.038 | 0.027 |
| O43617   | Trafficking protein particle complex subunit 3 OS=Homo sapiens GN=TRAPPC3 PE=1 SV=1 - [TPPC3_HUMAN]                                                  | 1.039 | 0.045 |
| Q9H3L0   | Methylmalonic aciduria and homocystinuria type D protein, mitochondrial OS=Homo sapiens GN=MMADHC PE=1 SV=2 - [MMAD_HUMAN]                           | 1.040 | 0.022 |
| Q9NXV6   | CDKN2A-interacting protein OS=Homo sapiens GN=CDKN2AIP PE=1 SV=3 - [CARF_HUMAN]                                                                      | 1.041 | 0.037 |
| Q96B96   | Promethin OS=Homo sapiens GN=TMEM159 PE=2 SV=2 - [TM159_HUMAN]                                                                                       | 1.043 | 0.021 |
| Q99613   | Eukaryotic translation initiation factor 3 subunit C OS=Homo sapiens GN=EIF3C PE=1 SV=1 - [EIF3C_HUMAN]                                              | 1.044 | 0.045 |
| O43681   | ATPase ASNA1 OS=Homo sapiens GN=ASNA1 PE=1 SV=2 - [ASNA_HUMAN]                                                                                       | 1.047 | 0.016 |
| Q9BRX2   | Protein pelota homolog OS=Homo sapiens GN=PELO PE=1 SV=2 - [PELO_HUMAN]                                                                              | 1.050 | 0.009 |
| O60292   | Signal-induced proliferation-associated 1-like protein 3 OS=Homo sapiens GN=SIPA1L3 PE=1 SV=3 - [SI1L3_HUMAN]                                        | 1.050 | 0.015 |
| O15164-2 | Isoform Short of Transcription intermediary factor 1-alpha OS=Homo sapiens GN=TRIM24 - [TIF1A_HUMAN]                                                 | 1.051 | 0.040 |
| Q8NHY2-3 | Isoform 3 of E3 ubiquitin-protein ligase RFWD2 OS=Homo sapiens GN=RFWD2 - [RFWD2_HUMAN]                                                              | 1.051 | 0.005 |
| Q7Z401   | C-myc promoter-binding protein OS=Homo sapiens GN=DENND4A PE=1 SV=2 - [MYCPP_HUMAN]                                                                  | 1.052 | 0.030 |
| Q9UPA5   | Protein bassoon OS=Homo sapiens GN=BSN PE=1 SV=4 - [BSN_HUMAN]                                                                                       | 1.053 | 0.008 |
| O95486   | Protein transport protein Sec24A OS=Homo sapiens GN=SEC24A PE=1 SV=2 - [SC24A_HUMAN]                                                                 | 1.053 | 0.041 |
| Q12824-2 | Isoform B of SWI/SNF-related matrix-associated actin-dependent regulator of chromatin subfamily B member 1 OS=Homo sapiens GN=SMARCB1 - [SNF5_HUMAN] | 1.055 | 0.005 |
| Q15633-2 | Isoform 2 of RISC-loading complex subunit TARBP2 OS=Homo sapiens GN=TARBP2 - [TRBP2_HUMAN]                                                           | 1.057 | 0.017 |
| Q9GZS1-2 | Isoform 2 of DNA-directed RNA polymerase I subunit RPA49 OS=Homo sapiens GN=POLR1E - [RPA49_HUMAN]                                                   | 1.058 | 0.010 |
| Q13283   | Ras GTPase-activating protein-binding protein 1 OS=Homo sapiens GN=G3BP1 PE=1 SV=1 - [G3BP1_HUMAN]                                                   | 1.060 | 0.044 |
| Q13356   | Peptidyl-prolyl cis-trans isomerase-like 2 OS=Homo sapiens GN=PPIL2 PE=1 SV=1 - [PPIL2_HUMAN]                                                        | 1.063 | 0.036 |
| Q4LE39-2 | Isoform 2 of AT-rich interactive domain-containing protein 4B OS=Homo sapiens GN=ARID4B - [ARI4B_HUMAN]                                              | 1.063 | 0.049 |
| Q8NEZ2-2 | Isoform 2 of Vacuolar protein sorting-associated protein 37A OS=Homo sapiens GN=VPS37A - [VP37A_HUMAN]                                               | 1.065 | 0.011 |
| Q92786   | Prospero homeobox protein 1 OS=Homo sapiens GN=PROX1 PE=1 SV=2 - [PROX1_HUMAN]                                                                       | 1.067 | 0.046 |
| Q9NRX2   | 39S ribosomal protein L17, mitochondrial OS=Homo sapiens GN=MRPL17 PE=1 SV=1 - [RM17_HUMAN]                                                          | 1.067 | 0.028 |
| Q6ZSJ8   | Uncharacterized protein C1orf122 OS=Homo sapiens GN=C1orf122 PE=2 SV=2 - [CA122_HUMAN]                                                               | 1.071 | 0.012 |
| Q9NR28-2 | Isoform 2 of Diablo homolog, mitochondrial OS=Homo sapiens GN=DIABLO - [DBLOH_HUMAN]                                                                 | 1.071 | 0.003 |
| Q9BX95   | Sphingosine-1-phosphate phosphatase 1 OS=Homo sapiens GN=SGPP1 PE=1 SV=2 - [SGPP1_HUMAN]                                                             | 1.072 | 0.042 |
| Q6GQQ9   | OTU domain-containing protein 7B OS=Homo sapiens GN=OTUD7B PE=1 SV=1 - [OTU7B_HUMAN]                                                                 | 1.073 | 0.002 |
| Q96KQ7-2 | Isoform 2 of Histone-lysine N-methyltransferase EHMT2 OS=Homo sapiens GN=EHMT2 - [EHMT2_HUMAN]                                                       | 1.074 | 0.014 |

|          |                                                                                                                           |       |       |
|----------|---------------------------------------------------------------------------------------------------------------------------|-------|-------|
| Q12772   | Sterol regulatory element-binding protein 2 OS=Homo sapiens GN=SREBF2 PE=1 SV=2 - [SRBP2_HUMAN]                           | 1.075 | 0.045 |
| Q15527   | Surfeit locus protein 2 OS=Homo sapiens GN=SURF2 PE=1 SV=3 - [SURF2_HUMAN]                                                | 1.075 | 0.006 |
| P06748-2 | Isoform 2 of Nucleophosmin OS=Homo sapiens GN=NPM1 - [NPM_HUMAN]                                                          | 1.075 | 0.020 |
| Q96LA8-2 | Isoform 2 of Protein arginine N-methyltransferase 6 OS=Homo sapiens GN=PRMT6 - [ANM6_HUMAN]                               | 1.077 | 0.015 |
| O76003   | Glutaredoxin-3 OS=Homo sapiens GN=GLRX3 PE=1 SV=2 - [GLRX3_HUMAN]                                                         | 1.080 | 0.024 |
| Q9UBP6   | tRNA (guanine-N(7)-)-methyltransferase OS=Homo sapiens GN=METTTL1 PE=1 SV=1 - [TRMB_HUMAN]                                | 1.082 | 0.010 |
| Q96SZ5   | 2-aminoethanethiol dioxygenase OS=Homo sapiens GN=ADO PE=1 SV=2 - [AEDO_HUMAN]                                            | 1.084 | 0.022 |
| P25686-2 | Isoform 2 of DnaJ homolog subfamily B member 2 OS=Homo sapiens GN=DNAJB2 - [DNJB2_HUMAN]                                  | 1.085 | 0.030 |
| Q9Y5F0   | Protocadherin beta-13 OS=Homo sapiens GN=PCDHB13 PE=2 SV=1 - [PCDBD_HUMAN]                                                | 1.090 | 0.033 |
| Q12805-2 | Isoform 2 of EGF-containing fibulin-like extracellular matrix protein 1 OS=Homo sapiens GN=EFEMP1 - [FBLN3_HUMAN]         | 1.091 | 0.018 |
| P27701   | CD82 antigen OS=Homo sapiens GN=CD82 PE=1 SV=1 - [CD82_HUMAN]                                                             | 1.092 | 0.015 |
| Q13325   | Interferon-induced protein with tetratricopeptide repeats 5 OS=Homo sapiens GN=IFIT5 PE=1 SV=1 - [IFIT5_HUMAN]            | 1.094 | 0.010 |
| Q8IXW5-2 | Isoform 2 of Putative RNA polymerase II subunit B1 CTD phosphatase RPAP2 OS=Homo sapiens GN=RPAP2 - [RPAP2_HUMAN]         | 1.098 | 0.048 |
| Q01850   | Cerebellar degeneration-related protein 2 OS=Homo sapiens GN=CDR2 PE=1 SV=2 - [CDR2_HUMAN]                                | 1.099 | 0.036 |
| Q96ES7   | SAGA-associated factor 29 homolog OS=Homo sapiens GN=CCDC101 PE=1 SV=1 - [SGF29_HUMAN]                                    | 1.099 | 0.043 |
| Q86VR2   | Protein FAM134C OS=Homo sapiens GN=FAM134C PE=1 SV=1 - [F134C_HUMAN]                                                      | 1.102 | 0.040 |
| Q9NUP7   | tRNA guanosine-2'-O-methyltransferase TRM13 homolog OS=Homo sapiens GN=CCDC76 PE=1 SV=2 - [TRM13_HUMAN]                   | 1.104 | 0.031 |
| Q9NRG0   | Chromatin accessibility complex protein 1 OS=Homo sapiens GN=CHRC1 PE=1 SV=1 - [CHRC1_HUMAN]                              | 1.104 | 0.022 |
| Q92979   | Ribosomal RNA small subunit methyltransferase NEP1 OS=Homo sapiens GN=EMG1 PE=1 SV=4 - [NEP1_HUMAN]                       | 1.107 | 0.029 |
| Q9UN86-2 | Isoform B of Ras GTPase-activating protein-binding protein 2 OS=Homo sapiens GN=G3BP2 - [G3BP2_HUMAN]                     | 1.107 | 0.015 |
| P53804-3 | Isoform TPRDIII of E3 ubiquitin-protein ligase TTC3 OS=Homo sapiens GN=TTC3 - [TTC3_HUMAN]                                | 1.107 | 0.003 |
| O43865   | Putative adenosylhomocysteinase 2 OS=Homo sapiens GN=AHCYL1 PE=1 SV=2 - [SAHH2_HUMAN]                                     | 1.108 | 0.046 |
| Q9UHW5   | GPN-loop GTPase 3 OS=Homo sapiens GN=GPN3 PE=1 SV=2 - [GPN3_HUMAN]                                                        | 1.108 | 0.003 |
| P50542-3 | Isoform 3 of Peroxisomal targeting signal 1 receptor OS=Homo sapiens GN=PEX5 - [PEX5_HUMAN]                               | 1.109 | 0.048 |
| Q96BJ3   | Axin interactor, dorsalization-associated protein OS=Homo sapiens GN=AIDA PE=1 SV=1 - [AIDA_HUMAN]                        | 1.111 | 0.037 |
| Q93063   | Exostosin-2 OS=Homo sapiens GN=EXT2 PE=1 SV=1 - [EXT2_HUMAN]                                                              | 1.111 | 0.013 |
| Q9NS00-2 | Isoform 2 of Glycoprotein-N-acetylgalactosamine 3-beta-galactosyltransferase 1 OS=Homo sapiens GN=C1GALT1 - [C1GLT_HUMAN] | 1.118 | 0.043 |
| P02760   | Protein AMBP OS=Homo sapiens GN=AMBP PE=1 SV=1 - [AMBP_HUMAN]                                                             | 1.120 | 0.026 |
| Q86Y91-2 | Isoform 2 of Kinesin-like protein KIF18B OS=Homo sapiens GN=KIF18B - [KI18B_HUMAN]                                        | 1.122 | 0.046 |

|          |                                                                                                                           |       |       |
|----------|---------------------------------------------------------------------------------------------------------------------------|-------|-------|
| Q95801   | Tetratricopeptide repeat protein 4 OS=Homo sapiens GN=TTC4 PE=1 SV=3 - [TTC4_HUMAN]                                       | 1.130 | 0.035 |
| Q8TF30   | WASP homolog-associated protein with actin, membranes and microtubules OS=Homo sapiens GN=WHAMM PE=1 SV=2 - [WHAMM_HUMAN] | 1.133 | 0.021 |
| Q9H6E5   | Speckle targeted PIP5K1A-regulated poly(A) polymerase OS=Homo sapiens GN=TUT1 PE=1 SV=2 - [STPAP_HUMAN]                   | 1.137 | 0.020 |
| Q14181   | DNA polymerase alpha subunit B OS=Homo sapiens GN=POLA2 PE=1 SV=2 - [DPOA2_HUMAN]                                         | 1.147 | 0.011 |
| Q96FX2   | DPH3 homolog OS=Homo sapiens GN=DPH3 PE=1 SV=1 - [DPH3_HUMAN]                                                             | 1.154 | 0.022 |
| Q8WUH6   | UPF0444 transmembrane protein C12orf23 OS=Homo sapiens GN=C12orf23 PE=1 SV=1 - [CL023_HUMAN]                              | 1.162 | 0.047 |
| Q96K49-2 | Isoform 2 of Transmembrane protein 87B OS=Homo sapiens GN=TMEM87B - [TM87B_HUMAN]                                         | 1.162 | 0.009 |
| Q9BPX7   | UPF0415 protein C7orf25 OS=Homo sapiens GN=C7orf25 PE=1 SV=1 - [CG025_HUMAN]                                              | 1.165 | 0.036 |
| Q99697-3 | Isoform PTX2A of Pituitary homeobox 2 OS=Homo sapiens GN=PITX2 - [PITX2_HUMAN]                                            | 1.165 | 0.026 |
| Q9BWS9-3 | Isoform 3 of Chitinase domain-containing protein 1 OS=Homo sapiens GN=CHID1 - [CHID1_HUMAN]                               | 1.165 | 0.035 |
| Q95466   | Formin-like protein 1 OS=Homo sapiens GN=FMNL1 PE=1 SV=3 - [FMNL_HUMAN]                                                   | 1.165 | 0.022 |
| Q9UGY1   | Nucleolar protein 12 OS=Homo sapiens GN=NOL12 PE=1 SV=1 - [NOL12_HUMAN]                                                   | 1.170 | 0.010 |
| P49427   | Ubiquitin-conjugating enzyme E2 R1 OS=Homo sapiens GN=CDC34 PE=1 SV=2 - [UB2R1_HUMAN]                                     | 1.173 | 0.050 |
| Q9UL54-3 | Isoform 3 of Serine/threonine-protein kinase TAO2 OS=Homo sapiens GN=TAOK2 - [TAOK2_HUMAN]                                | 1.176 | 0.006 |
| Q6UXM1-2 | Isoform 2 of Leucine-rich repeats and immunoglobulin-like domains protein 3 OS=Homo sapiens GN=LRIG3 - [LRIG3_HUMAN]      | 1.176 | 0.048 |
| Q06547-4 | Isoform 4 of GA-binding protein subunit beta-1 OS=Homo sapiens GN=GABPB1 - [GABP1_HUMAN]                                  | 1.179 | 0.041 |
| O43734-4 | Isoform 4 of Adapter protein CIKS OS=Homo sapiens GN=TRAF3IP2 - [CIKS_HUMAN]                                              | 1.181 | 0.042 |
| Q12983   | BCL2/adenovirus E1B 19 kDa protein-interacting protein 3 OS=Homo sapiens GN=BNIP3 PE=1 SV=2 - [BNIP3_HUMAN]               | 1.183 | 0.044 |
| Q9Y653-2 | Isoform 2 of G-protein coupled receptor 56 OS=Homo sapiens GN=GPR56 - [GPR56_HUMAN]                                       | 1.191 | 0.013 |
| Q8TCY9-3 | Isoform 3 of Up-regulator of cell proliferation OS=Homo sapiens GN=URGCP - [URGCP_HUMAN]                                  | 1.199 | 0.026 |
| Q9NXV2   | BTB/POZ domain-containing protein KCTD5 OS=Homo sapiens GN=KCTD5 PE=1 SV=1 - [KCTD5_HUMAN]                                | 1.208 | 0.016 |
| Q16787-1 | Isoform 1 of Laminin subunit alpha-3 OS=Homo sapiens GN=LAMA3 - [LAMA3_HUMAN]                                             | 1.212 | 0.017 |
| Q96A19   | Coiled-coil domain-containing protein 102A OS=Homo sapiens GN=CCDC102A PE=1 SV=2 - [C102A_HUMAN]                          | 1.218 | 0.007 |
| Q92823-3 | Isoform 3 of Neuronal cell adhesion molecule OS=Homo sapiens GN=NRCAM - [NRCAM_HUMAN]                                     | 1.224 | 0.010 |
| Q5T2R2-3 | Isoform 3 of Decaprenyl-diphosphate synthase subunit 1 OS=Homo sapiens GN=PDSS1 - [DPS1_HUMAN]                            | 1.242 | 0.038 |
| P17707   | S-adenosylmethionine decarboxylase proenzyme OS=Homo sapiens GN=AMD1 PE=1 SV=2 - [DCAM_HUMAN]                             | 1.259 | 0.046 |
| Q6ZRI6-2 | Isoform 2 of Uncharacterized protein C15orf39 OS=Homo sapiens GN=C15orf39 - [CO039_HUMAN]                                 | 1.305 | 0.005 |
| O75081-2 | Isoform 2 of Protein CBFA2T3 OS=Homo sapiens GN=CBFA2T3 - [MTG16_HUMAN]                                                   | 1.383 | 0.013 |

**H727 - 48 hours lanreotide (233 proteins)**

|          |                                                                                                                                                       |       |       |
|----------|-------------------------------------------------------------------------------------------------------------------------------------------------------|-------|-------|
| Q8N0X2-4 | Isoform 4 of Sperm-associated antigen 16 protein OS=Homo sapiens GN=SPAG16 - [SPG16_HUMAN]                                                            | 0.094 | 0.003 |
| P11926   | Ornithine decarboxylase OS=Homo sapiens GN=ODC1 PE=1 SV=2 - [DCOR_HUMAN]                                                                              | 0.357 | 0.011 |
| A0FGR8-2 | Isoform 2 of Extended synaptotagmin-2 OS=Homo sapiens GN=ESYT2 - [ESYT2_HUMAN]                                                                        | 0.510 | 0.029 |
| O76027   | Annexin A9 OS=Homo sapiens GN=ANXA9 PE=1 SV=3 - [ANXA9_HUMAN]                                                                                         | 0.613 | 0.017 |
| P38936   | Cyclin-dependent kinase inhibitor 1 OS=Homo sapiens GN=CDKN1A PE=1 SV=3 - [CDN1A_HUMAN]                                                               | 0.621 | 0.021 |
| P30825   | High affinity cationic amino acid transporter 1 OS=Homo sapiens GN=SLC7A1 PE=1 SV=1 - [CTR1_HUMAN]                                                    | 0.635 | 0.049 |
| Q01101   | Insulinoma-associated protein 1 OS=Homo sapiens GN=INSM1 PE=2 SV=1 - [INSM1_HUMAN]                                                                    | 0.670 | 0.046 |
| P04798   | Cytochrome P450 1A1 OS=Homo sapiens GN=CYP1A1 PE=1 SV=1 - [CP1A1_HUMAN]                                                                               | 0.688 | 0.046 |
| Q15011-3 | Isoform 3 of Homocysteine-responsive endoplasmic reticulum-resident ubiquitin-like domain member 1 protein OS=Homo sapiens GN=HERPUD1 - [HERP1_HUMAN] | 0.706 | 0.038 |
| P06732   | Creatine kinase M-type OS=Homo sapiens GN=CKM PE=1 SV=2 - [KCRM_HUMAN]                                                                                | 0.738 | 0.040 |
| P17275   | Transcription factor jun-B OS=Homo sapiens GN=JUNB PE=1 SV=1 - [JUNB_HUMAN]                                                                           | 0.744 | 0.013 |
| Q8N594-2 | Isoform 2 of MPN domain-containing protein OS=Homo sapiens GN=MPND - [MPND_HUMAN]                                                                     | 0.744 | 0.033 |
| Q6P9G4   | Transmembrane protein 154 OS=Homo sapiens GN=TMEM154 PE=2 SV=2 - [TM154_HUMAN]                                                                        | 0.758 | 0.040 |
| Q53GA4   | Pleckstrin homology-like domain family A member 2 OS=Homo sapiens GN=PHLDA2 PE=1 SV=2 - [PHLA2_HUMAN]                                                 | 0.761 | 0.008 |
| O43474-4 | Isoform 3 of Krueppel-like factor 4 OS=Homo sapiens GN=KLF4 - [KLF4_HUMAN]                                                                            | 0.785 | 0.044 |
| Q9NPA3   | Mid1-interacting protein 1 OS=Homo sapiens GN=MID1IP1 PE=1 SV=1 - [M1IP1_HUMAN]                                                                       | 0.792 | 0.031 |
| P17707   | S-adenosylmethionine decarboxylase proenzyme OS=Homo sapiens GN=AMD1 PE=1 SV=2 - [DCAM_HUMAN]                                                         | 0.800 | 0.049 |
| Q5T7W0-3 | Isoform 3 of Zinc finger protein 618 OS=Homo sapiens GN=ZNF618 - [ZN618_HUMAN]                                                                        | 0.805 | 0.014 |
| P48739-2 | Isoform 2 of Phosphatidylinositol transfer protein beta isoform OS=Homo sapiens GN=PITPNB - [PIPNB_HUMAN]                                             | 0.805 | 0.034 |
| P08247   | Synaptophysin OS=Homo sapiens GN=SYP PE=1 SV=3 - [SYPH_HUMAN]                                                                                         | 0.811 | 0.046 |
| P53355-2 | Isoform 2 of Death-associated protein kinase 1 OS=Homo sapiens GN=DAPK1 - [DAPK1_HUMAN]                                                               | 0.819 | 0.006 |
| P43007   | Neutral amino acid transporter A OS=Homo sapiens GN=SLC1A4 PE=1 SV=1 - [SATT_HUMAN]                                                                   | 0.819 | 0.015 |
| O43581   | Synaptotagmin-7 OS=Homo sapiens GN=SYT7 PE=1 SV=3 - [SYT7_HUMAN]                                                                                      | 0.826 | 0.022 |
| Q7RTP0-2 | Isoform 2 of Magnesium transporter NIPA1 OS=Homo sapiens GN=NIPA1 - [NIPA1_HUMAN]                                                                     | 0.831 | 0.034 |
| Q8NET8-3 | Isoform 3 of Transient receptor potential cation channel subfamily V member 3 OS=Homo sapiens GN=TRPV3 - [TRPV3_HUMAN]                                | 0.835 | 0.024 |
| P40121   | Macrophage-capping protein OS=Homo sapiens GN=CAPG PE=1 SV=2 - [CAPG_HUMAN]                                                                           | 0.837 | 0.041 |
| Q9Y394-2 | Isoform 2 of Dehydrogenase/reductase SDR family member 7 OS=Homo sapiens GN=DHRS7 - [DHRS7_HUMAN]                                                     | 0.839 | 0.039 |
| P10253   | Lysosomal alpha-glucosidase OS=Homo sapiens GN=GAA PE=1 SV=4 - [LYAG_HUMAN]                                                                           | 0.853 | 0.023 |

|                      |                                                                                                                                   |       |       |
|----------------------|-----------------------------------------------------------------------------------------------------------------------------------|-------|-------|
| P23634-7             | Isoform ZB of Plasma membrane calcium-transporting ATPase 4 OS=Homo sapiens GN=ATP2B4 - [AT2B4_HUMAN]                             | 0.861 | 0.050 |
| P30042-2<br>Q9NNW7-2 | Isoform Short of ES1 protein homolog, mitochondrial OS=Homo sapiens GN=C21orf33 - [ES1_HUMAN]                                     | 0.866 | 0.046 |
| Q02218               | Isoform 2 of Thioredoxin reductase 2, mitochondrial OS=Homo sapiens GN=TXNRD2 - [TRXR2_HUMAN]                                     | 0.870 | 0.019 |
| P01116               | 2-oxoglutarate dehydrogenase, mitochondrial OS=Homo sapiens GN=OGDH PE=1 SV=3 - [ODO1_HUMAN]                                      | 0.875 | 0.024 |
| P40939               | GTPase KRas OS=Homo sapiens GN=KRAS PE=1 SV=1 - [RASK_HUMAN]                                                                      | 0.877 | 0.036 |
| Q06546               | Trifunctional enzyme subunit alpha, mitochondrial OS=Homo sapiens GN=HADHA PE=1 SV=2 - [ECHA_HUMAN]                               | 0.878 | 0.029 |
| Q15651-2             | GA-binding protein alpha chain OS=Homo sapiens GN=GABPA PE=1 SV=1 - [GABPA_HUMAN]                                                 | 0.879 | 0.026 |
| Q08722               | Isoform 2 of High mobility group nucleosome-binding domain-containing protein 3 OS=Homo sapiens GN=HMGN3 - [HMGN3_HUMAN]          | 0.881 | 0.007 |
| P17301               | Leukocyte surface antigen CD47 OS=Homo sapiens GN=CD47 PE=1 SV=1 - [CD47_HUMAN]                                                   | 0.882 | 0.035 |
| Q8NFH8-3             | Integrin alpha-2 OS=Homo sapiens GN=ITGA2 PE=1 SV=1 - [ITA2_HUMAN]                                                                | 0.886 | 0.014 |
| P11117               | Isoform 3 of RalBP1-associated Eps domain-containing protein 2 OS=Homo sapiens GN=REPS2 - [REPS2_HUMAN]                           | 0.887 | 0.039 |
| Q96AB3               | Lysosomal acid phosphatase OS=Homo sapiens GN=ACP2 PE=1 SV=3 - [PPAL_HUMAN]                                                       | 0.888 | 0.017 |
| O95372               | Isochorismatase domain-containing protein 2, mitochondrial OS=Homo sapiens GN=ISOC2 PE=1 SV=1 - [ISOC2_HUMAN]                     | 0.891 | 0.006 |
| Q7Z3D6-4             | Acyl-protein thioesterase 2 OS=Homo sapiens GN=LYPLA2 PE=1 SV=1 - [LYPA2_HUMAN]                                                   | 0.892 | 0.033 |
| P38159               | Isoform 4 of UPF0317 protein C14orf159, mitochondrial OS=Homo sapiens GN=C14orf159 - [CN159_HUMAN]                                | 0.895 | 0.021 |
| P41732               | RNA-binding motif protein, X chromosome OS=Homo sapiens GN=RBMX PE=1 SV=3 - [RBMX_HUMAN]                                          | 0.898 | 0.025 |
| Q9BQ95               | Tetraspanin-7 OS=Homo sapiens GN=TSPAN7 PE=1 SV=2 - [TSN7_HUMAN]                                                                  | 0.898 | 0.031 |
| P40925               | Evolutionarily conserved signaling intermediate in Toll pathway, mitochondrial OS=Homo sapiens GN=ECSIT PE=1 SV=1 - [ECSIT_HUMAN] | 0.898 | 0.047 |
| Q6P161               | Malate dehydrogenase, cytoplasmic OS=Homo sapiens GN=MDH1 PE=1 SV=4 - [MDHC_HUMAN]                                                | 0.900 | 0.050 |
| Q96HE7               | 39S ribosomal protein L54, mitochondrial OS=Homo sapiens GN=MRPL54 PE=1 SV=1 - [RM54_HUMAN]                                       | 0.901 | 0.015 |
| O43246               | ERO1-like protein alpha OS=Homo sapiens GN=ERO1L PE=1 SV=2 - [ERO1A_HUMAN]                                                        | 0.903 | 0.024 |
| Q96D53               | Cationic amino acid transporter 4 OS=Homo sapiens GN=SLC7A4 PE=2 SV=3 - [CTR4_HUMAN]                                              | 0.904 | 0.012 |
| P42765               | Uncharacterized aarF domain-containing protein kinase 4 OS=Homo sapiens GN=ADCK4 PE=1 SV=2 - [ADCK4_HUMAN]                        | 0.904 | 0.026 |
| P47985               | 3-ketoacyl-CoA thiolase, mitochondrial OS=Homo sapiens GN=ACAA2 PE=1 SV=2 - [THIM_HUMAN]                                          | 0.904 | 0.014 |
| P13688-2             | Cytochrome b-c1 complex subunit Rieske, mitochondrial OS=Homo sapiens GN=UQCRFS1 PE=1 SV=2 - [UCRI_HUMAN]                         | 0.905 | 0.025 |
| A8MXV4               | Isoform 2 of Carcinoembryonic antigen-related cell adhesion molecule 1 OS=Homo sapiens GN=CEACAM1 - [CEAM1_HUMAN]                 | 0.909 | 0.046 |
| P28347               | Nucleoside diphosphate-linked moiety X motif 19, mitochondrial OS=Homo sapiens GN=NUDT19 PE=1 SV=1 - [NUD19_HUMAN]                | 0.909 | 0.037 |
| Q9UNA1-2             | Transcriptional enhancer factor TEF-1 OS=Homo sapiens GN=TEAD1 PE=1 SV=2 - [TEAD1_HUMAN]                                          | 0.910 | 0.011 |
|                      | Isoform 2 of Rho GTPase-activating protein 26 OS=Homo sapiens GN=ARHGAP26 - [RHG26_HUMAN]                                         | 0.912 | 0.002 |

|          |                                                                                                                   |       |       |
|----------|-------------------------------------------------------------------------------------------------------------------|-------|-------|
| Q9Y3D3   | 28S ribosomal protein S16, mitochondrial OS=Homo sapiens GN=MRPS16 PE=1 SV=1 - [RT16_HUMAN]                       | 0.912 | 0.035 |
| Q6UB35   | Monofunctional C1-tetrahydrofolate synthase, mitochondrial OS=Homo sapiens GN=MTHFD1L PE=1 SV=1 - [C1TM_HUMAN]    | 0.913 | 0.037 |
| P17509   | Homeobox protein Hox-B6 OS=Homo sapiens GN=HOXB6 PE=1 SV=4 - [HXB6_HUMAN]                                         | 0.913 | 0.021 |
| O96000   | NADH dehydrogenase [ubiquinone] 1 beta subcomplex subunit 10 OS=Homo sapiens GN=NDUFB10 PE=1 SV=3 - [NDUBA_HUMAN] | 0.914 | 0.026 |
| O00220   | Tumor necrosis factor receptor superfamily member 10A OS=Homo sapiens GN=TNFRSF10A PE=1 SV=3 - [TR10A_HUMAN]      | 0.914 | 0.018 |
| Q9HCU5   | Prolactin regulatory element-binding protein OS=Homo sapiens GN=PREB PE=1 SV=2 - [PREB_HUMAN]                     | 0.915 | 0.020 |
| P62820   | Ras-related protein Rab-1A OS=Homo sapiens GN=RAB1A PE=1 SV=3 - [RAB1A_HUMAN]                                     | 0.918 | 0.032 |
| P51148   | Ras-related protein Rab-5C OS=Homo sapiens GN=RAB5C PE=1 SV=2 - [RAB5C_HUMAN]                                     | 0.918 | 0.004 |
| P61026   | Ras-related protein Rab-10 OS=Homo sapiens GN=RAB10 PE=1 SV=1 - [RAB10_HUMAN]                                     | 0.920 | 0.048 |
| O15347   | High mobility group protein B3 OS=Homo sapiens GN=HMGB3 PE=1 SV=4 - [HMGB3_HUMAN]                                 | 0.920 | 0.023 |
| Q13153   | Serine/threonine-protein kinase PAK 1 OS=Homo sapiens GN=PAK1 PE=1 SV=2 - [PAK1_HUMAN]                            | 0.920 | 0.050 |
| Q00577   | Transcriptional activator protein Pur-alpha OS=Homo sapiens GN=PURA PE=1 SV=2 - [PURA_HUMAN]                      | 0.921 | 0.001 |
| O60885   | Bromodomain-containing protein 4 OS=Homo sapiens GN=BRD4 PE=1 SV=2 - [BRD4_HUMAN]                                 | 0.921 | 0.026 |
| Q13405   | 39S ribosomal protein L49, mitochondrial OS=Homo sapiens GN=MRPL49 PE=1 SV=1 - [RM49_HUMAN]                       | 0.921 | 0.039 |
| P25705   | ATP synthase subunit alpha, mitochondrial OS=Homo sapiens GN=ATP5A1 PE=1 SV=1 - [ATPA_HUMAN]                      | 0.921 | 0.043 |
| P49411   | Elongation factor Tu, mitochondrial OS=Homo sapiens GN=TUFM PE=1 SV=2 - [EFTU_HUMAN]                              | 0.922 | 0.025 |
| Q93099   | Homogentisate 1,2-dioxygenase OS=Homo sapiens GN=HGD PE=1 SV=2 - [HGD_HUMAN]                                      | 0.923 | 0.005 |
| P84103   | Serine/arginine-rich splicing factor 3 OS=Homo sapiens GN=SRSF3 PE=1 SV=1 - [SRSF3_HUMAN]                         | 0.923 | 0.045 |
| Q9Y276   | Mitochondrial chaperone BCS1 OS=Homo sapiens GN=BCS1L PE=1 SV=1 - [BCS1_HUMAN]                                    | 0.925 | 0.011 |
| Q96EK6   | Glucosamine 6-phosphate N-acetyltransferase OS=Homo sapiens GN=GNPNAT1 PE=1 SV=1 - [GNA1_HUMAN]                   | 0.926 | 0.043 |
| Q14671   | Pumilio homolog 1 OS=Homo sapiens GN=PUM1 PE=1 SV=3 - [PUM1_HUMAN]                                                | 0.927 | 0.048 |
| Q460N5-4 | Isoform 4 of Poly [ADP-ribose] polymerase 14 OS=Homo sapiens GN=PARP14 - [PAR14_HUMAN]                            | 0.927 | 0.019 |
| O95573   | Long-chain-fatty-acid--CoA ligase 3 OS=Homo sapiens GN=ACSL3 PE=1 SV=3 - [ACSL3_HUMAN]                            | 0.928 | 0.008 |
| Q9NRF8   | CTP synthase 2 OS=Homo sapiens GN=CTPS2 PE=1 SV=1 - [PYRG2_HUMAN]                                                 | 0.929 | 0.011 |
| P26447   | Protein S100-A4 OS=Homo sapiens GN=S100A4 PE=1 SV=1 - [S10A4_HUMAN]                                               | 0.929 | 0.034 |
| Q9H9P8   | L-2-hydroxyglutarate dehydrogenase, mitochondrial OS=Homo sapiens GN=L2HGDH PE=1 SV=3 - [L2HDH_HUMAN]             | 0.929 | 0.013 |
| Q16706   | Alpha-mannosidase 2 OS=Homo sapiens GN=MAN2A1 PE=1 SV=2 - [MA2A1_HUMAN]                                           | 0.930 | 0.044 |
| Q8TDJ6   | DmX-like protein 2 OS=Homo sapiens GN=DMXL2 PE=1 SV=2 - [DMXL2_HUMAN]                                             | 0.932 | 0.041 |
| P12532   | Creatine kinase U-type, mitochondrial OS=Homo sapiens GN=CKMT1A PE=1 SV=1 - [KCRU_HUMAN]                          | 0.932 | 0.031 |



|          |                                                                                                                                |       |       |
|----------|--------------------------------------------------------------------------------------------------------------------------------|-------|-------|
| P55199   | RNA polymerase II elongation factor ELL OS=Homo sapiens GN=ELL PE=1 SV=1 - [ELL_HUMAN]                                         | 0.933 | 0.028 |
| P57737-2 | Isoform 2 of Coronin-7 OS=Homo sapiens GN=CORO7 - [CORO7_HUMAN]                                                                | 0.933 | 0.023 |
| Q96EP5-2 | Isoform 2 of DAZ-associated protein 1 OS=Homo sapiens GN=DAZAP1 - [DAZP1_HUMAN]                                                | 0.934 | 0.033 |
| Q9H0V9   | VIP36-like protein OS=Homo sapiens GN=LMAN2L PE=1 SV=1 - [LMA2L_HUMAN]                                                         | 0.935 | 0.046 |
| Q9UHG3   | Prenylcysteine oxidase 1 OS=Homo sapiens GN=PCYOX1 PE=1 SV=3 - [PCYOX_HUMAN]                                                   | 0.936 | 0.022 |
| P10746   | Uroporphyrinogen-III synthase OS=Homo sapiens GN=UROS PE=1 SV=1 - [HEM4_HUMAN]                                                 | 0.936 | 0.006 |
| Q8NFW8   | N-acylneuraminate cytidyltransferase OS=Homo sapiens GN=CMAS PE=1 SV=2 - [NEUA_HUMAN]                                          | 0.939 | 0.046 |
| P61088   | Ubiquitin-conjugating enzyme E2 N OS=Homo sapiens GN=UBE2N PE=1 SV=1 - [UBE2N_HUMAN]                                           | 0.939 | 0.016 |
| Q96BQ5   | Coiled-coil domain-containing protein 127 OS=Homo sapiens GN=CCDC127 PE=1 SV=1 - [CC127_HUMAN]                                 | 0.940 | 0.012 |
| Q92766   | Ras-responsive element-binding protein 1 OS=Homo sapiens GN=RREB1 PE=1 SV=3 - [RREB1_HUMAN]                                    | 0.941 | 0.039 |
| Q9NXG2   | THUMP domain-containing protein 1 OS=Homo sapiens GN=THUMPD1 PE=1 SV=2 - [THUM1_HUMAN]                                         | 0.941 | 0.020 |
| O95785   | Protein Wiz OS=Homo sapiens GN=WIZ PE=1 SV=2 - [WIZ_HUMAN]                                                                     | 0.942 | 0.014 |
| P00505   | Aspartate aminotransferase, mitochondrial OS=Homo sapiens GN=GOT2 PE=1 SV=3 - [AATM_HUMAN]                                     | 0.943 | 0.008 |
| P10809   | 60 kDa heat shock protein, mitochondrial OS=Homo sapiens GN=HSPD1 PE=1 SV=2 - [CH60_HUMAN]                                     | 0.944 | 0.010 |
| Q00839-2 | Isoform Short of Heterogeneous nuclear ribonucleoprotein U OS=Homo sapiens GN=HNRNPU - [HNRPU_HUMAN]                           | 0.944 | 0.011 |
| P61160   | Actin-related protein 2 OS=Homo sapiens GN=ACTR2 PE=1 SV=1 - [ARP2_HUMAN]                                                      | 0.944 | 0.026 |
| P15153   | Ras-related C3 botulinum toxin substrate 2 OS=Homo sapiens GN=RAC2 PE=1 SV=1 - [RAC2_HUMAN]                                    | 0.946 | 0.033 |
| P36955   | Pigment epithelium-derived factor OS=Homo sapiens GN=SERPINF1 PE=1 SV=4 - [PEDF_HUMAN]                                         | 0.946 | 0.040 |
| Q96EN8   | Molybdenum cofactor sulfurase OS=Homo sapiens GN=MOCOS PE=1 SV=2 - [MOCOS_HUMAN]                                               | 0.947 | 0.025 |
| Q8N9N7   | Leucine-rich repeat-containing protein 57 OS=Homo sapiens GN=LRRC57 PE=1 SV=1 - [LRC57_HUMAN]                                  | 0.948 | 0.044 |
| P82914   | 28S ribosomal protein S15, mitochondrial OS=Homo sapiens GN=MRPS15 PE=1 SV=1 - [RT15_HUMAN]                                    | 0.949 | 0.027 |
| Q15059   | Bromodomain-containing protein 3 OS=Homo sapiens GN=BRD3 PE=1 SV=1 - [BRD3_HUMAN]                                              | 0.949 | 0.028 |
| Q8TEM1   | Nuclear pore membrane glycoprotein 210 OS=Homo sapiens GN=NUP210 PE=1 SV=3 - [PO210_HUMAN]                                     | 0.949 | 0.016 |
| O43674   | NADH dehydrogenase [ubiquinone] 1 beta subcomplex subunit 5, mitochondrial OS=Homo sapiens GN=NDUFB5 PE=1 SV=1 - [NDUB5_HUMAN] | 0.950 | 0.014 |
| Q15061   | WD repeat-containing protein 43 OS=Homo sapiens GN=WDR43 PE=1 SV=3 - [WDR43_HUMAN]                                             | 0.950 | 0.040 |
| P35270   | Sepiapterin reductase OS=Homo sapiens GN=SPR PE=1 SV=1 - [SPRE_HUMAN]                                                          | 0.951 | 0.037 |
| P23786   | Carnitine O-palmitoyltransferase 2, mitochondrial OS=Homo sapiens GN=CPT2 PE=1 SV=2 - [CPT2_HUMAN]                             | 0.954 | 0.027 |
| Q9UNM6   | 26S proteasome non-ATPase regulatory subunit 13 OS=Homo sapiens GN=PSMD13 PE=1 SV=2 - [PSD13_HUMAN]                            | 0.956 | 0.002 |
| O75934   | Pre-mRNA-splicing factor SPF27 OS=Homo sapiens GN=BCAS2 PE=1 SV=1 - [SPF27_HUMAN]                                              | 0.961 | 0.046 |

|          |                                                                                                                          |       |       |
|----------|--------------------------------------------------------------------------------------------------------------------------|-------|-------|
| Q13232   | Nucleoside diphosphate kinase 3 OS=Homo sapiens GN=NME3 PE=1 SV=2 - [NDK3_HUMAN]                                         | 0.962 | 0.002 |
| Q8IW92   | Beta-galactosidase-1-like protein 2 OS=Homo sapiens GN=GLB1L2 PE=2 SV=1 - [GLBL2_HUMAN]                                  | 0.962 | 0.035 |
| Q5JTZ9   | Alanine--tRNA ligase, mitochondrial OS=Homo sapiens GN=AARS2 PE=1 SV=1 - [SYAM_HUMAN]                                    | 0.964 | 0.004 |
| Q12904   | Aminoacyl tRNA synthase complex-interacting multifunctional protein 1 OS=Homo sapiens GN=AIMP1 PE=1 SV=2 - [AIMP1_HUMAN] | 0.969 | 0.011 |
| Q9H4B7   | Tubulin beta-1 chain OS=Homo sapiens GN=TUBB1 PE=1 SV=1 - [TBB1_HUMAN]                                                   | 0.971 | 0.011 |
| Q8N1G0   | Zinc finger protein 687 OS=Homo sapiens GN=ZNF687 PE=1 SV=1 - [ZN687_HUMAN]                                              | 0.974 | 0.012 |
| O00139-2 | Isoform 2 of Kinesin-like protein KIF2A OS=Homo sapiens GN=KIF2A - [KIF2A_HUMAN]                                         | 0.978 | 0.025 |
| Q96S66   | Chloride channel CLIC-like protein 1 OS=Homo sapiens GN=CLCC1 PE=1 SV=1 - [CLCC1_HUMAN]                                  | 0.981 | 0.046 |
| Q8TB36   | Ganglioside-induced differentiation-associated protein 1 OS=Homo sapiens GN=GDAP1 PE=1 SV=3 - [GDAP1_HUMAN]              | 0.982 | 0.032 |
| Q9Y618-5 | Isoform 5 of Nuclear receptor corepressor 2 OS=Homo sapiens GN=NCOR2 - [NCOR2_HUMAN]                                     | 0.986 | 0.016 |
| Q15075   | Early endosome antigen 1 OS=Homo sapiens GN=EEA1 PE=1 SV=2 - [EEA1_HUMAN]                                                | 0.994 | 0.046 |
| O94822   | E3 ubiquitin-protein ligase listerin OS=Homo sapiens GN=LTN1 PE=1 SV=6 - [LTN1_HUMAN]                                    | 1.013 | 0.031 |
| Q9Y2J2-2 | Isoform B of Band 4.1-like protein 3 OS=Homo sapiens GN=EPB41L3 - [E41L3_HUMAN]                                          | 1.014 | 0.020 |
| Q15006   | Tetratricopeptide repeat protein 35 OS=Homo sapiens GN=TTC35 PE=1 SV=1 - [TTC35_HUMAN]                                   | 1.018 | 0.029 |
| O95376   | E3 ubiquitin-protein ligase ARIH2 OS=Homo sapiens GN=ARIH2 PE=1 SV=1 - [ARI2_HUMAN]                                      | 1.024 | 0.002 |
| Q03468   | DNA excision repair protein ERCC-6 OS=Homo sapiens GN=ERCC6 PE=1 SV=1 - [ERCC6_HUMAN]                                    | 1.024 | 0.020 |
| P54289-4 | Isoform 4 of Voltage-dependent calcium channel subunit alpha-2/delta-1 OS=Homo sapiens GN=CACNA2D1 - [CA2D1_HUMAN]       | 1.030 | 0.032 |
| O00462   | Beta-mannosidase OS=Homo sapiens GN=MANBA PE=1 SV=3 - [MANBA_HUMAN]                                                      | 1.031 | 0.047 |
| Q96CW1-2 | Isoform 2 of AP-2 complex subunit mu OS=Homo sapiens GN=AP2M1 - [AP2M1_HUMAN]                                            | 1.033 | 0.050 |
| O00233-2 | Isoform p27-S of 26S proteasome non-ATPase regulatory subunit 9 OS=Homo sapiens GN=PSMD9 - [PSMD9_HUMAN]                 | 1.037 | 0.010 |
| O00232   | 26S proteasome non-ATPase regulatory subunit 12 OS=Homo sapiens GN=PSMD12 PE=1 SV=3 - [PSD12_HUMAN]                      | 1.038 | 0.009 |
| Q9H773   | dCTP pyrophosphatase 1 OS=Homo sapiens GN=DCTPP1 PE=1 SV=1 - [DCTP1_HUMAN]                                               | 1.040 | 0.026 |
| Q96CN9   | GRIP and coiled-coil domain-containing protein 1 OS=Homo sapiens GN=GCC1 PE=1 SV=1 - [GCC1_HUMAN]                        | 1.044 | 0.020 |
| Q9BV73-2 | Isoform 2 of Centrosome-associated protein CEP250 OS=Homo sapiens GN=CEP250 - [CP250_HUMAN]                              | 1.048 | 0.024 |
| O60343-2 | Isoform 2 of TBC1 domain family member 4 OS=Homo sapiens GN=TBC1D4 - [TBCD4_HUMAN]                                       | 1.062 | 0.030 |
| Q9Y294   | Histone chaperone ASF1A OS=Homo sapiens GN=ASF1A PE=1 SV=1 - [ASF1A_HUMAN]                                               | 1.066 | 0.035 |
| Q53H54   | tRNA wybutosine-synthesizing protein 2 homolog OS=Homo sapiens GN=TRMT12 PE=1 SV=1 - [TYW2_HUMAN]                        | 1.067 | 0.024 |
| Q96QU8   | Exportin-6 OS=Homo sapiens GN=XPO6 PE=1 SV=1 - [XPO6_HUMAN]                                                              | 1.069 | 0.008 |
| Q6UX53   | Methyltransferase-like protein 7B OS=Homo sapiens GN=METTTL7B PE=2 SV=2 - [MET7B_HUMAN]                                  | 1.069 | 0.049 |

|          |                                                                                                                                     |       |       |
|----------|-------------------------------------------------------------------------------------------------------------------------------------|-------|-------|
| Q13325   | Interferon-induced protein with tetratricopeptide repeats 5 OS=Homo sapiens GN=IFIT5 PE=1 SV=1 - [IFIT5_HUMAN]                      | 1.073 | 0.036 |
| Q9H0F6-2 | Isoform 2 of Sharpin OS=Homo sapiens GN=SHARPIN - [SHRPN_HUMAN]                                                                     | 1.073 | 0.025 |
| Q5T3U5-2 | Isoform 2 of Multidrug resistance-associated protein 7 OS=Homo sapiens GN=ABCC10 - [MRP7_HUMAN]                                     | 1.073 | 0.030 |
| Q9BRX2   | Protein pelota homolog OS=Homo sapiens GN=PELO PE=1 SV=2 - [PELO_HUMAN]                                                             | 1.075 | 0.035 |
| P19784   | Casein kinase II subunit alpha' OS=Homo sapiens GN=CSNK2A2 PE=1 SV=1 - [CSK22_HUMAN]                                                | 1.077 | 0.044 |
| Q7L1T6   | Cytochrome b5 reductase 4 OS=Homo sapiens GN=CYB5R4 PE=1 SV=1 - [NB5R4_HUMAN]                                                       | 1.077 | 0.031 |
| Q96LA8-2 | Isoform 2 of Protein arginine N-methyltransferase 6 OS=Homo sapiens GN=PRMT6 - [ANM6_HUMAN]                                         | 1.079 | 0.031 |
| Q8TCY9-3 | Isoform 3 of Up-regulator of cell proliferation OS=Homo sapiens GN=URGCP - [URGCP_HUMAN]                                            | 1.079 | 0.012 |
| O00151   | PDZ and LIM domain protein 1 OS=Homo sapiens GN=PDLIM1 PE=1 SV=4 - [PDL1_HUMAN]                                                     | 1.079 | 0.018 |
| Q99543   | DnaJ homolog subfamily C member 2 OS=Homo sapiens GN=DNAJC2 PE=1 SV=4 - [DNJC2_HUMAN]                                               | 1.079 | 0.031 |
| Q8N5F7   | NF-kappa-B-activating protein OS=Homo sapiens GN=NKAP PE=1 SV=1 - [NKAP_HUMAN]                                                      | 1.082 | 0.029 |
| Q7L5Y1   | Mitochondrial enolase superfamily member 1 OS=Homo sapiens GN=ENOSF1 PE=1 SV=1 - [ENOF1_HUMAN]                                      | 1.082 | 0.035 |
| Q8N9N5   | Protein BANP OS=Homo sapiens GN=BANP PE=1 SV=3 - [BANP_HUMAN]                                                                       | 1.084 | 0.050 |
| Q9ULX9   | Transcription factor MafF OS=Homo sapiens GN=MAFF PE=1 SV=2 - [MAFF_HUMAN]                                                          | 1.084 | 0.047 |
| Q9BTW9   | Tubulin-specific chaperone D OS=Homo sapiens GN=TBCD PE=1 SV=2 - [TBCD_HUMAN]                                                       | 1.085 | 0.040 |
| Q9UPQ9-1 | Isoform 2 of Trinucleotide repeat-containing gene 6B protein OS=Homo sapiens GN=TNRC6B - [TNR6B_HUMAN]                              | 1.086 | 0.039 |
| Q8TF01   | Arginine/serine-rich protein PNISR OS=Homo sapiens GN=PNISR PE=1 SV=2 - [PNISR_HUMAN]                                               | 1.087 | 0.012 |
| Q9UPM8   | AP-4 complex subunit epsilon-1 OS=Homo sapiens GN=AP4E1 PE=1 SV=2 - [AP4E1_HUMAN]                                                   | 1.090 | 0.022 |
| Q86WR0   | Coiled-coil domain-containing protein 25 OS=Homo sapiens GN=CCDC25 PE=1 SV=2 - [CCD25_HUMAN]                                        | 1.090 | 0.026 |
| O15294-3 | Isoform 1 of UDP-N-acetylglucosamine--peptide N-acetylglucosaminyltransferase 110 kDa subunit OS=Homo sapiens GN=OGT - [OGT1_HUMAN] | 1.092 | 0.050 |
| Q9BUF5   | Tubulin beta-6 chain OS=Homo sapiens GN=TUBB6 PE=1 SV=1 - [TBB6_HUMAN]                                                              | 1.098 | 0.030 |
| Q8WXW3   | Progesterone-induced-blocking factor 1 OS=Homo sapiens GN=PIBF1 PE=2 SV=2 - [PIBF1_HUMAN]                                           | 1.098 | 0.049 |
| P15923-2 | Isoform E47 of Transcription factor E2-alpha OS=Homo sapiens GN=TCF3 - [TFE2_HUMAN]                                                 | 1.099 | 0.048 |
| Q8TAC2   | Josephin-2 OS=Homo sapiens GN=JOSD2 PE=1 SV=1 - [JOS2_HUMAN]                                                                        | 1.102 | 0.025 |
| O95619   | YEATS domain-containing protein 4 OS=Homo sapiens GN=YEATS4 PE=1 SV=1 - [YETS4_HUMAN]                                               | 1.104 | 0.012 |
| Q9P2G3-2 | Isoform 2 of Kelch-like protein 14 OS=Homo sapiens GN=KLHL14 - [KLH14_HUMAN]                                                        | 1.104 | 0.042 |
| Q9H5V9   | UPF0428 protein CXorf56 OS=Homo sapiens GN=CXorf56 PE=1 SV=1 - [CX056_HUMAN]                                                        | 1.110 | 0.019 |
| Q9BSK4   | Protein fem-1 homolog A OS=Homo sapiens GN=FEM1A PE=1 SV=1 - [FEM1A_HUMAN]                                                          | 1.113 | 0.011 |
| Q6NXT6   | Transmembrane anterior posterior transformation protein 1 homolog OS=Homo sapiens GN=TAPT1 PE=1 SV=1 - [TAPT1_HUMAN]                | 1.113 | 0.047 |

|          |                                                                                                                   |       |       |
|----------|-------------------------------------------------------------------------------------------------------------------|-------|-------|
| O43353-2 | Isoform 2 of Receptor-interacting serine/threonine-protein kinase 2 OS=Homo sapiens GN=RIPK2 - [RIPK2_HUMAN]      | 1.117 | 0.033 |
| Q96IK1   | Biorientation of chromosomes in cell division protein 1 OS=Homo sapiens GN=BOD1 PE=1 SV=2 - [BOD1_HUMAN]          | 1.118 | 0.034 |
| Q8IXJ9   | Putative Polycomb group protein ASXL1 OS=Homo sapiens GN=ASXL1 PE=1 SV=3 - [ASXL1_HUMAN]                          | 1.121 | 0.004 |
| Q6NTF9   | Rhomboid domain-containing protein 2 OS=Homo sapiens GN=RHBDD2 PE=2 SV=2 - [RHBDD2_HUMAN]                         | 1.124 | 0.017 |
| O94964-2 | Isoform 2 of Uncharacterized protein KIAA0889 OS=Homo sapiens GN=KIAA0889 - [K0889_HUMAN]                         | 1.126 | 0.029 |
| P41214   | Eukaryotic translation initiation factor 2D OS=Homo sapiens GN=EIF2D PE=1 SV=3 - [EIF2D_HUMAN]                    | 1.126 | 0.019 |
| Q06547-4 | Isoform 4 of GA-binding protein subunit beta-1 OS=Homo sapiens GN=GABPB1 - [GABP1_HUMAN]                          | 1.127 | 0.024 |
| Q9Y508-2 | Isoform 2 of RING finger protein 114 OS=Homo sapiens GN=RNF114 - [RN114_HUMAN]                                    | 1.128 | 0.049 |
| Q9UK76-3 | Isoform 3 of Hematological and neurological expressed 1 protein OS=Homo sapiens GN=HN1 - [HN1_HUMAN]              | 1.129 | 0.020 |
| Q5VTB9   | E3 ubiquitin-protein ligase RNF220 OS=Homo sapiens GN=RNF220 PE=1 SV=1 - [RN220_HUMAN]                            | 1.130 | 0.047 |
| Q9NQX7-2 | Isoform 2 of Integral membrane protein 2C OS=Homo sapiens GN=ITM2C - [ITM2C_HUMAN]                                | 1.138 | 0.010 |
| Q92793   | CREB-binding protein OS=Homo sapiens GN=CREBBP PE=1 SV=3 - [CBP_HUMAN]                                            | 1.139 | 0.019 |
| Q9Y411-2 | Isoform 2 of Myosin-Va OS=Homo sapiens GN=MYO5A - [MYO5A_HUMAN]                                                   | 1.140 | 0.028 |
| Q9NRG0   | Chromatin accessibility complex protein 1 OS=Homo sapiens GN=CHRAC1 PE=1 SV=1 - [CHRC1_HUMAN]                     | 1.141 | 0.045 |
| Q1MSJ5-1 | Isoform 1 of Centrosome and spindle pole-associated protein 1 OS=Homo sapiens GN=CSPP1 - [CSPP1_HUMAN]            | 1.142 | 0.044 |
| Q49AR2   | UPF0489 protein C5orf22 OS=Homo sapiens GN=C5orf22 PE=1 SV=2 - [CE022_HUMAN]                                      | 1.146 | 0.035 |
| Q96PE2   | Rho guanine nucleotide exchange factor 17 OS=Homo sapiens GN=ARHGEF17 PE=1 SV=1 - [ARHGH_HUMAN]                   | 1.147 | 0.012 |
| Q8NC54   | Keratinocyte-associated transmembrane protein 2 OS=Homo sapiens GN=KCT2 PE=2 SV=2 - [KCT2_HUMAN]                  | 1.147 | 0.010 |
| Q6NXT1-2 | Isoform 2 of Ankyrin repeat domain-containing protein 54 OS=Homo sapiens GN=ANKRD54 - [ANR54_HUMAN]               | 1.147 | 0.047 |
| Q9BY67   | Cell adhesion molecule 1 OS=Homo sapiens GN=CADM1 PE=1 SV=2 - [CADM1_HUMAN]                                       | 1.150 | 0.004 |
| Q06481   | Amyloid-like protein 2 OS=Homo sapiens GN=APLP2 PE=1 SV=2 - [APLP2_HUMAN]                                         | 1.154 | 0.027 |
| O15078   | Centrosomal protein of 290 kDa OS=Homo sapiens GN=CEP290 PE=1 SV=2 - [CE290_HUMAN]                                | 1.158 | 0.033 |
| Q6UWI4   | Protein shisa-2 homolog OS=Homo sapiens GN=SHISA2 PE=1 SV=1 - [SHSA2_HUMAN]                                       | 1.159 | 0.031 |
| Q6P6C2-2 | Isoform 2 of Probable alpha-ketoglutarate-dependent dioxygenase ABH5 OS=Homo sapiens GN=ALKBH5 - [ALKB5_HUMAN]    | 1.159 | 0.034 |
| Q15025-2 | Isoform 2 of TNFAIP3-interacting protein 1 OS=Homo sapiens GN=TNIP1 - [TNIP1_HUMAN]                               | 1.159 | 0.006 |
| Q8TA86   | Retinitis pigmentosa 9 protein OS=Homo sapiens GN=RP9 PE=1 SV=2 - [RP9_HUMAN]                                     | 1.168 | 0.027 |
| Q562F6-2 | Isoform 2 of Shugoshin-like 2 OS=Homo sapiens GN=SGOL2 - [SGOL2_HUMAN]                                            | 1.168 | 0.028 |
| O43164-2 | Isoform 2 of E3 ubiquitin-protein ligase Praja-2 OS=Homo sapiens GN=PJA2 - [PJA2_HUMAN]                           | 1.172 | 0.015 |
| O43422-2 | Isoform Short of 52 kDa repressor of the inhibitor of the protein kinase OS=Homo sapiens GN=PRKRIR - [P52K_HUMAN] | 1.174 | 0.006 |

|          |                                                                                                                   |       |       |
|----------|-------------------------------------------------------------------------------------------------------------------|-------|-------|
| Q9Y679-3 | Isoform 3 of Ancient ubiquitous protein 1 OS=Homo sapiens GN=AUP1 - [AUP1_HUMAN]                                  | 1.177 | 0.006 |
| Q8NCU7   | C2 calcium-dependent domain-containing protein 4A OS=Homo sapiens GN=C2CD4A PE=2 SV=2 - [C2C4A_HUMAN]             | 1.178 | 0.022 |
| Q14679   | Tubulin polyglutamylase TTLL4 OS=Homo sapiens GN=TTLL4 PE=1 SV=2 - [TTLL4_HUMAN]                                  | 1.181 | 0.007 |
| Q9BQ24   | Zinc finger FYVE domain-containing protein 21 OS=Homo sapiens GN=ZFYVE21 PE=1 SV=1 - [ZFY21_HUMAN]                | 1.184 | 0.048 |
| O43865   | Putative adenosylhomocysteinase 2 OS=Homo sapiens GN=AHCYL1 PE=1 SV=2 - [SAHH2_HUMAN]                             | 1.189 | 0.007 |
| Q92786   | Prospero homeobox protein 1 OS=Homo sapiens GN=PROX1 PE=1 SV=2 - [PROX1_HUMAN]                                    | 1.190 | 0.034 |
| P02760   | Protein AMBP OS=Homo sapiens GN=AMBP PE=1 SV=1 - [AMBP_HUMAN]                                                     | 1.196 | 0.029 |
| Q9H1A3-2 | Isoform 2 of Methyltransferase-like protein 9 OS=Homo sapiens GN=METTLL9 - [METL9_HUMAN]                          | 1.198 | 0.006 |
| Q9Y6M4-3 | Isoform 3 of Casein kinase I isoform gamma-3 OS=Homo sapiens GN=CSNK1G3 - [KC1G3_HUMAN]                           | 1.199 | 0.032 |
| P12259   | Coagulation factor V OS=Homo sapiens GN=F5 PE=1 SV=4 - [FA5_HUMAN]                                                | 1.203 | 0.033 |
| Q9NQS1   | Cell death regulator Aven OS=Homo sapiens GN=AVEN PE=1 SV=1 - [AVEN_HUMAN]                                        | 1.204 | 0.018 |
| Q9H8W3   | Protein FAM204A OS=Homo sapiens GN=FAM204A PE=2 SV=1 - [F204A_HUMAN]                                              | 1.205 | 0.021 |
| Q9BXS4   | Transmembrane protein 59 OS=Homo sapiens GN=TMEM59 PE=1 SV=1 - [TMM59_HUMAN]                                      | 1.211 | 0.020 |
| Q9H9L7   | Akirin-1 OS=Homo sapiens GN=AKIRIN1 PE=1 SV=1 - [AKIR1_HUMAN]                                                     | 1.212 | 0.043 |
| Q13137   | Calcium-binding and coiled-coil domain-containing protein 2 OS=Homo sapiens GN=CALCOCO2 PE=1 SV=1 - [CACO2_HUMAN] | 1.215 | 0.040 |
| O96020-2 | Isoform Short of G1/S-specific cyclin-E2 OS=Homo sapiens GN=CCNE2 - [CCNE2_HUMAN]                                 | 1.217 | 0.025 |
| Q9BVV6-2 | Isoform 2 of Uncharacterized protein KIAA0586 OS=Homo sapiens GN=KIAA0586 - [K0586_HUMAN]                         | 1.230 | 0.040 |
| Q15345   | Leucine-rich repeat-containing protein 41 OS=Homo sapiens GN=LRRC41 PE=1 SV=3 - [LRC41_HUMAN]                     | 1.231 | 0.042 |
| Q96S15-2 | Isoform 2 of WD repeat-containing protein 24 OS=Homo sapiens GN=WDR24 - [WDR24_HUMAN]                             | 1.236 | 0.004 |
| Q96RV3-2 | Isoform 2 of Pecanex-like protein 1 OS=Homo sapiens GN=PCNX - [PCX1_HUMAN]                                        | 1.242 | 0.042 |
| Q9UHQ1-3 | Isoform 3 of Nuclear prelamin A recognition factor OS=Homo sapiens GN=NARF - [NARF_HUMAN]                         | 1.244 | 0.036 |
| Q86VP1-3 | Isoform 3 of Tax1-binding protein 1 OS=Homo sapiens GN=TAX1BP1 - [TAXB1_HUMAN]                                    | 1.247 | 0.026 |
| Q92823-3 | Isoform 3 of Neuronal cell adhesion molecule OS=Homo sapiens GN=NRCAM - [NRCAM_HUMAN]                             | 1.253 | 0.043 |
| P28356   | Homeobox protein Hox-D9 OS=Homo sapiens GN=HOXD9 PE=2 SV=5 - [HXD9_HUMAN]                                         | 1.278 | 0.024 |
| Q9BQ16-2 | Isoform 2 of Testican-3 OS=Homo sapiens GN=SPOCK3 - [TICN3_HUMAN]                                                 | 1.294 | 0.036 |
| Q9NR48-2 | Isoform 2 of Histone-lysine N-methyltransferase ASH1L OS=Homo sapiens GN=ASH1L - [ASH1L_HUMAN]                    | 1.300 | 0.031 |
| Q9NWL6   | Asparagine synthetase domain-containing protein 1 OS=Homo sapiens GN=ASNSD1 PE=2 SV=2 - [ASND1_HUMAN]             | 1.342 | 0.044 |
| O60930   | Ribonuclease H1 OS=Homo sapiens GN=RNASEH1 PE=1 SV=2 - [RNH1_HUMAN]                                               | 1.347 | 0.027 |
| Q9Y625   | Glypican-6 OS=Homo sapiens GN=GPC6 PE=2 SV=1 - [GPC6_HUMAN]                                                       | 1.378 | 0.020 |

|          |                                                                                                       |       |       |
|----------|-------------------------------------------------------------------------------------------------------|-------|-------|
| P07949-2 | Isoform 2 of Proto-oncogene tyrosine-protein kinase receptor Ret OS=Homo sapiens GN=RET - [RET_HUMAN] | 1.465 | 0.009 |
| Q08043   | Alpha-actinin-3 OS=Homo sapiens GN=ACTN3 PE=1 SV=2 - [ACTN3_HUMAN]                                    | 1.735 | 0.032 |

---

Each protein expression ratio was normalized to its non-treated control which was assigned arbitrary value 1

**Supplementary Table S4. Significantly up- or down-regulated proteins after lanreotide treatment.**

| <b>Accession number</b>                | <b>Gene symbol</b> | <b>Protein description</b>                                             | <b>Expression vs. Control</b> | <b>P - value</b> |
|----------------------------------------|--------------------|------------------------------------------------------------------------|-------------------------------|------------------|
| <b>HC45 cells - 2 hours lanreotide</b> |                    |                                                                        |                               |                  |
| Q9H147                                 | <i>DNTTIP1</i>     | Deoxynucleotidyltransferase terminal-interacting protein 1             | 0.58                          | 0.042            |
| P62714                                 | <i>PPP2CB</i>      | Serine/threonine-protein phosphatase 2A catalytic subunit beta isoform | 0.59                          | 0.002            |
| P25054-2                               | <i>APC</i> *       | Isoform Short of Adenomatous polyposis coli protein                    | 1.36                          | 0.029            |
| O15145                                 | <i>ARPC3</i>       | Actin-related protein 2/3 complex subunit 3                            | 1.47                          | 0.013            |
| Q8N8U9                                 | <i>BMPER</i> *     | BMP-binding endothelial regulator protein                              | 1.52                          | 0.020            |
| <b>HC45 cells - 6 hours lanreotide</b> |                    |                                                                        |                               |                  |
| Q13015                                 | <i>MLLT11</i>      | Protein AF1q                                                           | 0.54                          | 0.053            |
| P13645                                 | <i>KRT10</i>       | Keratin, type I cytoskeletal 10                                        | 0.60                          | 0.035            |
| Q15051-3                               | <i>IQCB1</i>       | Isoform 3 of IQ calmodulin-binding motif-containing protein 1          | 0.61                          | 0.019            |
| P13647                                 | <i>KRT5</i>        | Keratin, type II cytoskeletal 5                                        | 0.63                          | 0.007            |
| Q9H147                                 | <i>DNTTIP1</i>     | Deoxynucleotidyltransferase terminal-interacting protein 1             | 0.67                          | 0.051            |
| Q9BXV9                                 | <i>C14orf142</i> * | Uncharacterized protein C14orf142                                      | 0.67                          | 0.013            |
| Q4ZIN3-2                               | <i>C19orf6</i>     | Isoform 2 of Membralin                                                 | 0.68                          | 0.027            |
| Q9H3K2                                 | <i>GHITM</i>       | Growth hormone-inducible transmembrane protein                         | 1.41                          | 0.046            |
| Q9Y2C4                                 | <i>EXOG</i>        | Nuclease EXOG, mitochondrial                                           | 1.45                          | 0.025            |
| O75880                                 | <i>SCO1</i>        | Protein SCO1 homolog, mitochondrial                                    | 1.45                          | 0.034            |
| O15235                                 | <i>MRPS12</i>      | 28S ribosomal protein S12, mitochondrial                               | 1.53                          | 0.028            |
| O75323                                 | <i>GBAS</i>        | Protein NipSnap homolog 2                                              | 1.57                          | 0.036            |
| P62877                                 | <i>RBX1</i>        | E3 ubiquitin-protein ligase RBX1                                       | 1.60                          | 0.039            |
| P62273                                 | <i>RPS29</i>       | 40S ribosomal protein S29                                              | 1.58                          | 0.054            |
| Q86VY9                                 | <i>TMEM200A</i>    | Transmembrane protein 200A                                             | 1.61                          | 0.041            |
| Q9Y3E0                                 | <i>GOLT1B</i>      | Vesicle transport protein GOT1B                                        | 2.00                          | 0.051            |
| Q3B7S5                                 | <i>C18orf62</i> *  | <i>SMIM21</i> , Small integral membrane protein 21                     | 2.11                          | 0.012            |
| Q9BYX7                                 | <i>POTEKP</i>      | Putative beta-actin-like protein 3                                     | 2.21                          | 0.048            |

**HC45 cells - 48 hours lanreotide**

|          |                |                                                                        |      |       |
|----------|----------------|------------------------------------------------------------------------|------|-------|
| P13473   | <i>LAMP2</i>   | Lysosome-associated membrane glycoprotein 2                            | 0.40 | 0.035 |
| P53539   | <i>FOSB</i>    | Protein fosB                                                           | 0.46 | 0.002 |
| P60903   | <i>S100A10</i> | Protein S100-A10                                                       | 0.54 | 0.043 |
| Q96SL4   | <i>GPX7</i>    | Glutathione peroxidase 7                                               | 0.53 | 0.051 |
| Q04695   | <i>KRT17</i>   | Keratin, type I cytoskeletal 17                                        | 0.54 | 0.009 |
| Q96J01   | <i>THOC3</i>   | THO complex subunit 3                                                  | 0.55 | 0.023 |
| P17096-2 | <i>HMGA1</i>   | Isoform HMG-Y of High mobility group protein HMG-I/HMG-Y               | 0.57 | 0.054 |
| P0CG34   | <i>TMSB15A</i> | Thymosin beta-15A                                                      | 0.57 | 0.001 |
| O95243-3 | <i>MBD4</i>    | Isoform 3 of Methyl-CpG-binding domain protein 4                       | 0.59 | 0.014 |
| O43852-2 | <i>CALU</i>    | Isoform 2 of Calumenin                                                 | 0.62 | 0.054 |
| Q16678   | <i>CYP1B1</i>  | Cytochrome P450 1B1                                                    | 0.63 | 0.033 |
| Q9H8M7   | <i>FAM188A</i> | Protein FAM188A                                                        | 0.63 | 0.031 |
| O60573   | <i>EIF4E2</i>  | Eukaryotic translation initiation factor 4E type 2                     | 0.63 | 0.053 |
| P05114   | <i>HMG1</i>    | Non-histone chromosomal protein HMG-14                                 | 0.64 | 0.042 |
| O95218-2 | <i>ZRANB2</i>  | Isoform 2 of Zinc finger Ran-binding domain-containing protein 2       | 0.64 | 0.042 |
| Q16831   | <i>UPP1</i>    | Uridine phosphorylase 1                                                | 0.64 | 0.006 |
| Q15005   | <i>SPCS2</i>   | Signal peptidase complex subunit 2                                     | 0.66 | 0.046 |
| Q9Y4P8-3 | <i>WIPI2</i>   | Isoform 3 of WD repeat domain phosphoinositide-interacting protein 2   | 0.66 | 0.050 |
| Q6UWJ1-3 | <i>TMCO3</i>   | Isoform 3 of Transmembrane and coiled-coil domain-containing protein 3 | 0.67 | 0.036 |
| P09493-3 | <i>TPM1</i>    | Isoform 3 of Tropomyosin alpha-1 chain                                 | 0.67 | 0.048 |
| Q9UIL1-4 | <i>SCOC</i>    | Isoform 4 of Short coiled-coil protein                                 | 1.32 | 0.020 |
| P98172   | <i>EFNB1</i>   | Ephrin-B1                                                              | 1.32 | 0.047 |
| Q86U90   | <i>YRDC</i>    | YrdC domain-containing protein, mitochondrial                          | 1.34 | 0.044 |
| O15392-7 | <i>BIRC5</i> * | Survivin, Isoform 7 of Baculoviral IAP repeat-containing protein 5     | 1.36 | 0.012 |
| Q9NR33   | <i>POLE4</i>   | DNA polymerase epsilon subunit 4                                       | 1.38 | 0.044 |
| Q9H8G2   | <i>C9orf82</i> | Uncharacterized protein C9orf82                                        | 1.38 | 0.011 |
| P14316   | <i>IRF2</i>    | Interferon regulatory factor 2                                         | 1.40 | 0.036 |
| Q92529-2 | <i>SHC3</i>    | Isoform p52 of SHC-transforming protein 3                              | 1.37 | 0.031 |
| Q5FWF5-2 | <i>ESCO1</i>   | Isoform 2 of N-acetyltransferase ESCO1                                 | 1.40 | 0.044 |
| O00635   | <i>TRIM38</i>  | Tripartite motif-containing protein 38                                 | 1.42 | 0.045 |



|          |               |                                                                     |      |       |
|----------|---------------|---------------------------------------------------------------------|------|-------|
| Q8NFH3   | <i>NUP43</i>  | Nucleoporin Nup43                                                   | 1.45 | 0.035 |
| P11166   | <i>SLC2A1</i> | Solute carrier family 2, facilitated glucose transporter member 1 O | 1.50 | 0.003 |
| Q99943   | <i>AGPAT1</i> | 1-acyl-sn-glycerol-3-phosphate acyltransferase alpha                | 1.53 | 0.049 |
| O14735   | <i>CDIPT</i>  | CDP-diacylglycerol--inositol 3-phosphatidyltransferase              | 1.54 | 0.034 |
| Q7KYR7   | <i>BTN2A1</i> | Butyrophilin subfamily 2 member A1                                  | 1.54 | 0.053 |
| O15235   | <i>MRPS12</i> | 28S ribosomal protein S12, mitochondrial                            | 1.56 | 0.027 |
| P06241-3 | <i>FYN</i> *  | Isoform 3 of Tyrosine-protein kinase Fyn                            | 1.63 | 0.048 |
| P42766   | <i>RPL35</i>  | 60S ribosomal protein L35                                           | 1.66 | 0.019 |
| Q9BZM5   | <i>ULBP2</i>  | NKG2D ligand 2                                                      | 1.70 | 0.003 |
| Q9Y3E7-4 | <i>CHMP3</i>  | Isoform 4 of Charged multivesicular body protein 3                  | 1.72 | 0.043 |
| Q15819   | <i>UBE2V2</i> | Ubiquitin-conjugating enzyme E2 variant 2                           | 1.86 | 0.046 |
| O15145   | <i>ARPC3</i>  | Actin-related protein 2/3 complex subunit 3                         | 2.50 | 0.045 |

***H727 cells - 2 hours lanreotide***

|          |                 |                                                             |      |       |
|----------|-----------------|-------------------------------------------------------------|------|-------|
| P84243   | <i>H3F3A</i>    | Histone H3.3                                                | 0.52 | 0.013 |
| Q71DI3   | <i>HIST2H3A</i> | Histone H3.2                                                | 0.55 | 0.052 |
| Q9UBC1-2 | <i>NFKBIL1</i>  | Isoform 2 of NF-kappa-B inhibitor-like protein 1            | 0.61 | 0.052 |
| Q6DD87   | <i>ZNF787</i>   | Zinc finger protein 787                                     | 0.63 | 0.038 |
| P53671-2 | <i>LIMK2</i>    | Isoform LIMK2b of LIM domain kinase 2                       | 0.72 | 0.042 |
| Q9UJH8   | <i>METRIN</i>   | Meteorin                                                    | 0.76 | 0.030 |
| Q8IZQ1-2 | <i>WDFY3</i>    | Isoform 2 of WD repeat and FYVE domain-containing protein 3 | 0.78 | 0.048 |
| Q9H7E9   | <i>C8orf33</i>  | UPF0488 protein C8orf33                                     | 1.22 | 0.044 |
| P08670   | <i>VIM</i>      | Vimentin                                                    | 1.23 | 0.027 |
| Q9UMW8   | <i>USP18</i>    | Ubl carboxyl-terminal hydrolase 18                          | 1.22 | 0.053 |
| Q14296   | <i>FASTK</i>    | Fas-activated serine/threonine kinase                       | 1.23 | 0.023 |
| Q86YD1-3 | <i>PTOV1</i>    | Isoform 3 of Prostate tumor-overexpressed gene 1 protein    | 1.22 | 0.025 |
| Q99985   | <i>SEMA3C</i>   | Semaphorin-3C                                               | 1.24 | 0.012 |
| Q8N394   | <i>TMTC2</i>    | Transmembrane and TPR repeat-containing protein 2           | 1.22 | 0.040 |
| Q9NRW4   | <i>DUSP22</i>   | Dual specificity protein phosphatase 22                     | 1.24 | 0.054 |
| Q15413-3 | <i>RYR3</i>     | Isoform 3 of Ryanodine receptor 3                           | 1.24 | 0.011 |
| P00973-2 | <i>OAS1</i>     | Isoform p41 of 2'-5'-oligoadenylate synthase 1              | 1.24 | 0.005 |

|          |                 |                                                       |      |       |
|----------|-----------------|-------------------------------------------------------|------|-------|
| Q9Y6B6   | <i>SAR1B</i>    | GTP-binding protein SAR1b                             | 1.25 | 0.030 |
| Q13795   | <i>ARFRP1</i>   | ADP-ribosylation factor-related protein 1             | 1.24 | 0.047 |
| P13611-2 | <i>VCAN</i>     | Isoform V1 of Versican core protein                   | 1.27 | 0.044 |
| Q8IYN2   | <i>TCEAL8</i>   | Transcription elongation factor A protein-like 8      | 1.27 | 0.043 |
| O00506   | <i>STK25</i>    | Serine/threonine-protein kinase 25                    | 1.27 | 0.036 |
| P53367-2 | <i>ARFIP1</i>   | Isoform A of Arfaptin-1 ]                             | 1.27 | 0.052 |
| Q5SWA1   | <i>PPP1R15B</i> | Protein phosphatase 1 regulatory subunit 15B          | 1.26 | 0.016 |
| Q13164-2 | <i>MAPK7</i>    | Isoform 2 of Mitogen-activated protein kinase 7       | 1.28 | 0.030 |
| O43542   | <i>XRCC3</i>    | DNA repair protein XRCC3                              | 1.27 | 0.013 |
| O60930   | <i>RNASEH1</i>  | Ribonuclease H1                                       | 1.28 | 0.026 |
| O15040   | <i>TECPR2</i>   | Tectonin beta-propeller repeat-containing protein 2   | 1.28 | 0.000 |
| O15055   | <i>PER2</i>     | Period circadian protein homolog 2                    | 1.28 | 0.006 |
| Q9P2W1   | <i>PSMC3IP</i>  | Homologous-pairing protein 2 homolog                  | 1.30 | 0.030 |
| Q6DCA0   | <i>AMMECR1L</i> | AMMECR1-like protein                                  | 1.29 | 0.009 |
| Q95807   | <i>TMEM50A</i>  | Transmembrane protein 50A                             | 1.28 | 0.055 |
| Q9NQ34   | <i>TMEM9B</i>   | Transmembrane protein 9B                              | 1.30 | 0.044 |
| Q96S15-2 | <i>WDR24</i>    | Isoform 2 of WD repeat-containing protein 24          | 1.32 | 0.040 |
| Q9Y6M4-3 | <i>CSNK1G3</i>  | Isoform 3 of Casein kinase I isoform gamma-3          | 1.31 | 0.040 |
| P15923-2 | <i>TCF3</i>     | Isoform E47 of Transcription factor E2-alpha          | 1.33 | 0.017 |
| Q562F6-2 | <i>SGOL2</i>    | Isoform 2 of Shugoshin-like 2                         | 1.36 | 0.030 |
| P49447   | <i>CYB561</i>   | Cytochrome b561                                       | 1.34 | 0.043 |
| Q99715-4 | <i>COL12A1</i>  | Isoform 4 of Collagen alpha-1(XII) chain              | 1.38 | 0.042 |
| O14628-4 | <i>ZNF195</i>   | Isoform 4 of Zinc finger protein 195                  | 1.43 | 0.040 |
| Q08043   | <i>ACTN3</i>    | Alpha-actinin-3                                       | 1.46 | 0.009 |
| P36894   | <i>BMPR1A</i>   | Bone morphogenetic protein receptor type-1A           | 1.51 | 0.023 |
| P53667-2 | <i>LIMK1</i>    | Isoform 2 of LIM domain kinase 1                      | 1.59 | 0.014 |
| Q9UBT7-2 | <i>CTNNAL1</i>  | Isoform 2 of Alpha-catenin                            | 1.59 | 0.013 |
| Q9C030   | <i>TRIM6</i>    | Tripartite motif-containing protein 6                 | 1.61 | 0.053 |
| Q8IYH5-2 | <i>ZZZ3</i>     | Isoform 2 of ZZ-type zinc finger-containing protein 3 | 1.89 | 0.037 |

**HC727 cells - 6 hours lanreotide**

|          |                 |                                                                                                            |      |       |
|----------|-----------------|------------------------------------------------------------------------------------------------------------|------|-------|
| Q8N0X2-4 | <i>SPAG16</i> * | Isoform 4 of Sperm-associated antigen 16 protein                                                           | 0.11 | 0.000 |
| O76027   | <i>ANXA9</i>    | Annexin A9                                                                                                 | 0.42 | 0.039 |
| P11926   | <i>ODC1</i>     | Ornithine decarboxylase                                                                                    | 0.53 | 0.005 |
| Q92802   | <i>N4BP2L2</i>  | NEDD4-binding protein 2-like 2                                                                             | 0.55 | 0.045 |
| Q9H8M1   | <i>COQ10B</i>   | Coenzyme Q-binding protein COQ10 homolog B, mitochondrial                                                  | 0.62 | 0.021 |
| P18847   | <i>ATF3</i>     | Cyclic AMP-dependent transcription factor ATF-3                                                            | 0.62 | 0.049 |
| O75382-3 | <i>TRIM3</i>    | Isoform Gamma of Tripartite motif-containing protein 3                                                     | 0.65 | 0.019 |
| Q15011-3 | <i>HERPUD1</i>  | Isoform 3 of Homocysteine-responsive endoplasmic reticulum-resident ubiquitin-like domain member 1 protein | 0.69 | 0.042 |
| Q96DN5-2 | <i>WDR67</i>    | Isoform 2 of WD repeat-containing protein 67                                                               | 0.73 | 0.024 |
| Q99576-4 | <i>TSC22D3</i>  | Isoform 3 of TSC22 domain family protein 3                                                                 | 0.73 | 0.001 |
| Q71DI3   | <i>HIST2H3A</i> | Histone H3.2                                                                                               | 0.72 | 0.049 |
| Q9H0X9   | <i>OSBPL5</i>   | Oxysterol-binding protein-related protein 5                                                                | 0.74 | 0.011 |
| O60907-2 | <i>TBL1X</i>    | Isoform 2 of F-box-like/WD repeat-containing protein TBL1X                                                 | 0.75 | 0.042 |
| P53667-2 | <i>LIMK1</i>    | Isoform 2 of LIM domain kinase 1                                                                           | 0.78 | 0.034 |
| Q96A19   | <i>CCDC102A</i> | Coiled-coil domain-containing protein 102A                                                                 | 1.22 | 0.007 |
| Q92823-3 | <i>NRCAM</i>    | Isoform 3 of Neuronal cell adhesion molecule                                                               | 1.22 | 0.010 |
| Q06520   | <i>SULT2A1</i>  | Bile salt sulfotransferase                                                                                 | 1.23 | 0.053 |
| O14513   | <i>NCKAP5</i>   | Nck-associated protein 5                                                                                   | 1.26 | 0.053 |
| Q5T2R2-3 | <i>PDSS1</i>    | Isoform 3 of Decaprenyl-diphosphate synthase subunit 1                                                     | 1.25 | 0.038 |
| P17707   | <i>AMD1</i>     | S-adenosylmethionine decarboxylase proenzyme                                                               | 1.27 | 0.046 |
| Q6ZRI6-2 | <i>C15orf39</i> | Isoform 2 of Uncharacterized protein C15orf39                                                              | 1.30 | 0.005 |
| O75081-2 | <i>CBFA2T3</i>  | Isoform 2 of Protein CBFA2T3                                                                               | 1.37 | 0.013 |

#### **H727 cells - 48 hours lanreotide**

|          |                 |                                                  |      |       |
|----------|-----------------|--------------------------------------------------|------|-------|
| Q8N0X2-4 | <i>SPAG16</i> * | Isoform 4 of Sperm-associated antigen 16 protein | 0.09 | 0.003 |
| P11926   | <i>ODC1</i>     | Ornithine decarboxylase                          | 0.36 | 0.011 |
| A0FGR8-2 | <i>ESYT2</i>    | Isoform 2 of Extended synaptotagmin-2            | 0.52 | 0.029 |
| O76027   | <i>ANXA9</i>    | Annexin A9                                       | 0.61 | 0.017 |
| P38936   | <i>CDKN1A</i>   | Cyclin-dependent kinase inhibitor 1              | 0.62 | 0.021 |
| P30825   | <i>SLC7A1</i>   | High affinity cationic amino acid transporter 1  | 0.63 | 0.049 |

|          |                 |                                                                                                            |      |       |
|----------|-----------------|------------------------------------------------------------------------------------------------------------|------|-------|
| Q01101   | <i>INSM1</i> *  | Insulinoma-associated protein 1                                                                            | 0.66 | 0.046 |
| P04798   | <i>CYP1A1</i>   | Cytochrome P450 1A1                                                                                        | 0.68 | 0.046 |
| Q15011-3 | <i>HERPUD1</i>  | Isoform 3 of Homocysteine-responsive endoplasmic reticulum-resident ubiquitin-like domain member 1 protein | 0.71 | 0.038 |
| P06732   | <i>CKM</i>      | Creatine kinase M-type                                                                                     | 0.73 | 0.040 |
| P17275   | <i>JUNB</i>     | Transcription factor jun-B                                                                                 | 0.75 | 0.013 |
| Q8N594-2 | <i>MPND</i>     | Isoform 2 of MPN domain-containing protein                                                                 | 0.74 | 0.033 |
| Q9UNP4-2 | <i>ST3GAL5</i>  | Isoform 2 of Lactosylceramide alpha-2,3-sialyltransferase                                                  | 0.75 | 0.054 |
| Q6P9G4   | <i>TMEM154</i>  | Transmembrane protein 154                                                                                  | 0.75 | 0.040 |
| Q53GA4   | <i>PHLDA2</i>   | Pleckstrin homology-like domain family A member 2                                                          | 0.76 | 0.008 |
| Q53GL0-2 | <i>PLEKHO1</i>  | Isoform 2 of Pleckstrin homology domain-containing family O member 1                                       | 0.77 | 0.052 |
| O96020-2 | <i>CCNE2</i>    | Isoform Short of G1/S-specific cyclin-E2                                                                   | 1.22 | 0.025 |
| Q9BVV6-2 | <i>KIAA0586</i> | Isoform 2 of Uncharacterized protein KIAA0586                                                              | 1.23 | 0.040 |
| Q15345   | <i>LRRC41</i>   | Leucine-rich repeat-containing protein 41                                                                  | 1.22 | 0.042 |
| Q96S15-2 | <i>WDR24</i>    | Isoform 2 of WD repeat-containing protein 24                                                               | 1.24 | 0.004 |
| Q96EN9   | <i>C19orf60</i> | Uncharacterized protein C19orf60                                                                           | 1.24 | 0.053 |
| Q96RV3-2 | <i>PCNX</i>     | Isoform 2 of Pecanex-like protein 1                                                                        | 1.24 | 0.042 |
| Q9UHQ1-3 | <i>NARF</i>     | Isoform 3 of Nuclear prelamin A recognition factor                                                         | 1.26 | 0.036 |
| Q86VP1-3 | <i>TAX1BP1</i>  | Isoform 3 of Tax1-binding protein 1                                                                        | 1.25 | 0.026 |
| Q92823-3 | <i>NRCAM</i>    | Isoform 3 of Neuronal cell adhesion molecule                                                               | 1.25 | 0.043 |
| P28356   | <i>HOXD9</i>    | Homeobox protein Hox-D9                                                                                    | 1.27 | 0.024 |
| Q9BQ16-2 | <i>SPOCK3</i>   | Isoform 2 of Testican-3                                                                                    | 1.31 | 0.036 |
| Q9NR48-2 | <i>ASH1L</i>    | Isoform 2 of Histone-lysine N-methyltransferase ASH1L                                                      | 1.32 | 0.031 |
| Q9NWL6   | <i>ASNSD1</i>   | Asparagine synthetase domain-containing protein 1                                                          | 1.35 | 0.044 |
| O60930   | <i>RNASEH1</i>  | Ribonuclease H1                                                                                            | 1.35 | 0.027 |
| Q9Y625   | <i>GPC6</i>     | Glypican-6                                                                                                 | 1.38 | 0.020 |
| P07949-2 | <i>RET</i>      | Isoform 2 of Proto-oncogene tyrosine-protein kinase receptor Ret                                           | 1.45 | 0.009 |
| Q08043   | <i>ACTN3</i>    | Alpha-actinin-3                                                                                            | 1.75 | 0.032 |

Each protein expression ratio was normalized to its non-treated control which was assigned arbitrary value 1

Cut-offs for up-regulation and down-regulation were 0.69 and 1.33 for HC45 and 0.78 and 1.22 for H727

\* Proteins selected for Western blot analysis and functional studies

**Supplementary Table S5. Immunohistochemistry for APC and survivin in SI-NETs.**

| SI-NET samples | Sample analyzed | SSA treatment | Age at diagnosis | Gender F / M | Ki-67 % | APC    |   |             |   | survivin |   |             |   |
|----------------|-----------------|---------------|------------------|--------------|---------|--------|---|-------------|---|----------|---|-------------|---|
|                |                 |               |                  |              |         | normal |   | tumor cells |   | normal   |   | tumor cells |   |
|                |                 |               |                  |              |         | N      | C | N           | C | N        | C | N           | C |
| 1A             | Primary         | Yes           | 75               | F            | 1       | 0      | 0 | 0           | 0 | 0        | 0 | 0           | 1 |
| 1B             | Primary         | Yes           | 75               | F            | 1       | 0      | 0 | 0           | 0 | 2        | 1 | 2           | 2 |
| 2              | Primary         | Yes           | 63               | M            | 1.5     | 0      | 1 | 0           | 1 | 1        | 1 | 1           | 1 |
| 3              | Primary         | Yes           | 74               | F            | <1      | 0      | 2 | 1           | 1 | 0        | 0 | 0           | 0 |
| 4A             | Primary         | Yes           | 71               | F            | 1       | 0      | 0 | 1           | 0 | 2        | 0 | 2           | 0 |
| 4B             | Primary         | Yes           | 71               | F            | 1       | 0      | 3 | 2           | 1 | 0        | 0 | 0           | 0 |
| 5A             | Primary         | Yes           | 58               | F            | 1.5     | 0      | 2 | 0           | 2 | 0        | 0 | 2           | 2 |
| 5B             | Primary         | Yes           | 58               | F            | 1.5     | 0      | 0 | 0           | 1 | 0        | 0 | 3           | 3 |
| 6              | Primary         | Yes           | 63               | F            | 1       | 0      | 0 | 0           | 1 | 0        | 0 | 1           | 1 |
| 7A             | Metastasis      | No            | 51               | M            | <1      | 0      | 1 | 0           | 0 | 0        | 0 | 0           | 2 |
| 7B             | Metastasis      | No            | 51               | M            | <1      | 0      | 1 | 0           | 0 | 0        | 1 | 2           | 3 |
| 8A             | Primary         | No            | 54               | M            | <1      | 1      | 1 | 0           | 2 | 0        | 0 | 1           | 2 |
| 8B             | Primary         | No            | 54               | M            | <1      | 0      | 0 | 0           | 0 | 0        | 0 | 2           | 3 |
| 9              | Primary         | No            | 66               | M            | <1      | 0      | 1 | 0           | 1 | 0        | 0 | 0           | 1 |
| 10             | Primary         | No            | 60               | F            | <1      | 0      | 0 | 0           | 1 | 0        | 1 | 0           | 1 |
| 11A            | Primary         | No            | 59               | M            | <1      | 0      | 1 | 0           | 0 | 0        | 0 | 0           | 2 |
| 11B            | Primary         | No            | 59               | M            | <1      | 0      | 0 | 0           | 2 | 0        | 0 | 2           | 2 |
| 12A            | Primary         | No            | 73               | M            | 1       | 0      | 1 | 0           | 2 | 0        | 0 | 1           | 2 |
| 12B            | Primary         | No            | 73               | M            | 1       | 0      | 0 | 2           | 1 | 0        | 0 | 1           | 1 |
| 13             | Primary         | No            | 47               | F            | 3       | 0      | 0 | 0           | 0 | 0        | 0 | 0           | 2 |

N = nuclear, C = cytoplasmic, normal = normal epithelium

0 = absent, 1 = low, 2 = medium, 3 = high expression

## SUPPLEMENTAL MATERIAL

### Tissue microarray construction

Following confirmation of the NET diagnosis, representative areas of the tumors were selected on haematoxylin and eosin-stained sections and marked on individual paraffin blocks by expert pathologist in the field. Two tissue cores (1 mm in diameter) were obtained from each specimen. The tissue cores were arrayed into a receptor paraffin block using a tissue microarray workstation (Beecher Instruments, Silver Spring, MD, USA), as described previously (9). A haematoxylin and eosin-stained section of the array was reviewed to confirm the presence of morphologically representative areas of the original lesions.

### Genotypes and culturing of NET cell lines

Short tandem repeat (STR) genotyping was performed to assure the authenticity of the BON1 cells (at Biosynthesis Inc. Lewisville, TX) and has been previously published for HC45 and CNDT2 (12). The following genotypes were observed (for HC45 / CNDT2 / BON1) at the genotyped loci including: *D8S1178* (13, 16 / 9, 13, 14 / 10, 12); *D21S11* (29, 32.2 / 27, 31 / 28, 33.2); *D7S820* (8, 8 / 8, 10 / 9, 9); *CSFIPO* (9, 11 / 8, 11 / 10, 11); *D3S1358* (14, 17 / 16, 19 / 17, 17); *THO1* (6, 7 / 6, 10 / 8, 8); *DI3S317* (10, 11 / 8, 11 / 11, 12); *DI6S539* (12, 12 / 12, 13 / 10, 11); *D2S1338* (23, 25 / 16, 16 / 16, 23); *DI9S433* (12, 15 / 14, 14 / 12, 5.2); *vWA* (15, 16 / 17, 18, 25 / 18, 19); *TPOX* (8, 12 / 10, 11 / 9, 9); *DI8S51* (16, 16 / 11, 13 / 12, 12); *AMEL* (X, X / X, X / X, Y); *D5S818* (12, 13 / 11, 14 / 9, 12); and *FGA* (21, 24 / 20, 22 / 23, 23).

HC45 and CNDT2 were cultured in DMEM, BON1 cells were cultured in DMEM/F12 and NCI-H727 in RPMI-1640. All media were supplemented with FBS and the cells were incubated at 37 °C, 5% CO<sub>2</sub> in a humidified incubator.

### **HiRIEF LC-MS/MS experimental procedures and data analyses**

A total of 16 samples were profiled including lanreotide treated HC45 and NCI-H727 cells representing the time points 2, 6 and 48 hours as well as controls in duplicates. For protein preparation, cells were lysed in SDS buffer (4 % SDS, 25 mM HEPES, 1 mM DTT) applying 200 µL buffer/106 cells. The samples were then heated to 95 °C, homogenized by sonication with a probe tip (4 x 10 sec), and centrifuged at 10,000 rpm for 10 minutes at 4 °C. Protein concentrations were measured using the Bio-Rad DC protein assay (Bio-Rad Laboratories, Hercules, CA, USA). Two-hundred µg protein from each sample was digested applying the FASP (Filter Aided Sample Preparation) protocol.<sup>18</sup> One hundred µg of each peptide sample were labeled and pooled using the 8-plex iTRAQ kit (Applied Biosystems, Foster City, CA, USA) according to the manufacturer's instructions. Excess reagent was removed from the pooled sample using an SCX-cartridge (StrataSCX, Phenomenex, Torrence, CA, USA). The eluate was dried in a speed-vac.

The peptide isoelectric focusing procedure has been described before (7). iTRAQ-labeled tryptic peptide samples were dissolved in 300 µL 8 M urea. Narrow range IPG-strips for peptide focusing (pH 3.7 - 4.9) together with dry sample application gels (33×3×2 mm) were supplied by GE Healthcare Bio-Sciences AB, Uppsala, Sweden. After peptide separation samples were freeze-dried in a SpeedVac and kept at -20 °C. Prior to HiRIEF LC-MS/MS analysis, each fraction was re-suspended in 8 µl 3% acetonitrile and 0.1% formic acid.

### **HiRIEF LC-MS/MS data analysis**

In each LC-MS/MS run, the LC auto sampler (HPLC 1,200 system, Agilent Technologies) injected 3  $\mu$ l into a C18 guard desalting column (Zorbax 300SB-C18, 5 x 0.3 mm, 5  $\mu$ m bead size, Agilent). We then used a 15 cm long C18 picofrit column (100  $\mu$ m internal diameter, 5  $\mu$ m bead size, Nikkyo Technos Co., Tokyo, Japan) installed onto the nano-electrospray ionization (NSI) source. Solvent and gradient descriptions have been described before (7). Sequest searched all MS/MS spectra under the software platform Proteome Discoverer (v1.3.0.339, Thermo Scientific) against a fasta file containing human tryptic sequences. Settings used were: trypsin with 1 missed cleavage, carbamidomethylation on cysteine and iTRAQ-8 plex on lysine and N-terminal as fixed modifications, and oxidation of methionine as variable modification. Further settings for the MS/MS search have been described before (7). Results were limited to  $\geq 1$  high-confident unique peptide for quantification using a false discovery rate of  $<1$  % at the peptide level.

The consistency between replicate analysis in HC45 and H727 proteomics profiling data were evaluated by Principal component analysis (PCA) using the SIMCA software.

The software Disease Association Protein-Protein Link Evaluator version 2.0 (DAPPLE, <http://www.broadinstitute.org/mpg/dapple/dapple.php>) (34) was used to identify signaling networks for differentially expressed proteins. The physical connectivity was assessed between differentially expressed proteins with the highest/lowest fold change at different time points. All analyses were performed allowing 20,000 permutations and a common interactor binding degree cut-off of 2. Pathway analyses were carried out using the Ingenuity Pathway



Analysis (IPA) (Qiagen, CA, USA). Expected mass sizes of proteins of interest are according to information at [www.uniprot.org](http://www.uniprot.org).

Confidence interval = 0.95 was calculated as the mean  $\pm$  2  $\times$  (standard deviation) of the isobaric label ratios between non-treated controls and treated samples and was defined as cut-offs. Accordingly 0.69 and 1.33 for HC45 and 0.78 and 1.22 for H727 were considered as cut-offs for down-regulation and up-regulation, respectively. Noisy variables exceeding replicate variation based cut-off were excluded. T-test independent 2-tailed were calculated using Microsoft Excel to compare the expression of any protein in each time point vs. non-treated condition. *P*-values below 0.05 were reported as significant. Expression ratios exceeding the above-mentioned cut-offs were considered as down-regulated or up-regulated. Different conditions in proliferation assays and immunohistochemistry scores were compared applying t-test 2-tailed using Microsoft Excel or analyzed for correlations using Spearman's test IBM SPSS statistics version 20.0.

### **Immunocytochemistry**

Immunocytochemistry was performed essentially as previously described (14). In short, cells were trypsinized and cytopinned onto glass slides and incubated with primary antibodies over-night at 4 °C including: SSTR2 (Sigma-Aldrich, HPA007264) at dilution 1:100 for cell lines and 1:200 for the primary SI-NET culture; SSTR5 (Epitomics, clone UMB4) at 1:250 for cell lines and 1:200 for the primary SI-NET culture; and Chromogranin A (Santa Cruz) at 1:150. MIB1 proliferation index was determined by immunocytochemistry using the MIB1 antibody targeting Ki-67 (Dako) at dilution 1:200. FFPE sections of anonymized pancreatic tissue samples were used as positive controls using previously published methodology (15) and applying the SSTR2 and SSTR5 antibodies at dilution 1:300. Omission of the primary

antibodies served as negative controls, and expression in Langerhans cell islets of normal pancreas as a positive control.

### **Immunohistochemistry and tissue microarray**

Immunohistochemistry (IHC) was performed on the 20 SI-NET tissue samples employing previously published methodology (15) using primary antibodies for survivin (BIRC5 D-8, Santa Cruz Biotechnology) at dilution 1:50 and for APC (EP701Y, Abcam) at 1:100.

Anonymized tissue sections of normal breast and normal thyroid were included as positive controls of survivin and APC, respectively, and as negative controls after omission of the primary antibodies. Nuclear and cytoplasmic staining were observed and evaluated in tumor and normal epithelial cells on the same slides. The result was analyzed using a Zeiss Axioplan 2 (Carl Zeiss Jena GmbH, Jena, Germany) microscope, ProgRes C12 plus camera and ProgRes CapturePro 2.5 software.

IHC analyses of the 112 NETs were performed using previously published methodology (35) on 4 µm sections of the TMAs, obtained by a semi-automated microtome HM3508 (Microm). Briefly, tissue sections were deparaffinized and rehydrated in water, after which antigen retrieval was carried out in a DAKO PT Link in citrate buffer (pH 6). Endogenous peroxidase and non-specific antibody reactivity was blocked with peroxidase blocking reagent (Dako, Glostrup, Denmark) at room temperature for 15 min. The sections were then incubated for 60 min with a rabbit polyclonal survivin antibody (#Ab469, Abcam) diluted at 1:400 and a rabbit monoclonal APC antibody (#Ab40778, Abcam) diluted at 1:100. Detection was performed with EnvisionPlus Detection System (Dako) using an Olympus BX43 microscope with DP72 Olympus camera and LabSense software.

### **Western blot analysis**

After blocking membranes were incubated with primary antibodies overnight for APC (EP701Y, Abcam) at dilution 1:500, APC (op44, MERK, Calbiochem) at 1:1000, BMPER (Sigma-Aldrich) at 1:150, SMIM21 (C18orf62, Sigma-Aldrich) at 1:250, SPAG16 (Aviva Systems Biology) at 1:250, C14orf142 (Aviva Systems Biology) at 1:500, FYN (BD Biosciences) at 1:500, survivin (BIRC5 D-8, Santa Cruz Biotechnology) at 1:200, Chromogranin A (LK2H10, Santa Cruz Biotechnology) at 1:1000 and INSM1 (C-1, Santa Cruz Biotech) at 1:750. Rabbit GAPDH (Cell Signaling Technology) at 1:3,000 or mouse GAPDH (O411, Santa Cruz Biotechnology) at 1:10,000 and Vinculin (7F9, Santa Cruz Biotechnology) at 1:1,000, were used as loading controls. Goat anti-rabbit IgG-HRP (Santa Cruz Biotechnology) at 1:7,500, IRDye 800CW goat anti-mouse IgG (P/N 926-32210, LI-COR Biosciences) at 1:10,000 or IRDye 680RD Goat anti-Rabbit IgG (P/N 926-68071, LI-COR Biosciences) at 1:10,000 served as secondary antibodies and were incubated for one hour at room temperature. Membranes were read in an Odyssey imaging system (LI-COR Biosciences). Expression densities were quantified using Image Studio 2.1 software.

### **Proliferation assays**

For the BrdU proliferation assay, cells were seeded in the 96-well plates with densities of 4,000 cells/well for the primary SI-NET, 4,000 cells /well for HC45, 8,000 cells /well for BON1 and 8,000 cells/well for H727. BrdU labeling reagent was added 48 hours after treatment. Incubation of the cell lines or primary cell culture continued for 4 or 24 hours, respectively. Cells were then fixed and incubated with the BrdU antibody for 90 minutes.

The xCELLigence real time proliferation assays were performed on E-plates following the manufacturer's instructions (Aceabio). Experiments were carried out at 0.5% FBS. Cell

indices were obtained in 1 or 4 hours intervals. Data were normalized to the cell indices at the time of starting of the treatment assigning the arbitrary value of 1. Proliferation index was determined by immunocytochemistry using the MIB1 antibody (Dako) for detection of the Ki-67 antigen.

### ***In vitro* transfection experiments**

APC (pCMV-Neo-Bam APC Addgene plasmid # 16507) and its empty vector (pCMV-Neo-Bam Addgene plasmid # 16440) were a gift from Bert Vogelstein (36). Since HC45 cells are slow growing and difficult to transfect we used H727 cells for transfection experiments.

Lipofectamine 2000 or RNAiMAX was used for transfection of plasmids or siRNA 24 hours after seeding according to the instructions of the manufacturer (Life Technologies). Forty-eight hours later protein was extracted and used for Western blot analysis. To knock down APC, H727 cells were transfected with shAPC1 and shAPC2 (TRCN0000040093 and TRCN0000040097- Sigma Aldrich) under the same conditions. PLKO.1 eGFP knock-down shRNA (Sigma Aldrich) was used as a control. siRNA control 1 and siSSTR2 (s13500, Life Technologies) were used for *SSTR2* knock-down experiments.

### **References**

- 34. Rossin EJ, Lage K, Raychaudhuri S, Xavier RJ, Tatar D, Benita Y, International Inflammatory Bowel Disease Genetics C, Cotsapas C, Daly MJ.** Proteins encoded in genomic regions associated with immune-mediated disease physically interact and suggest underlying biology. *PLoS genet.* 2011;7:e1001273.
- 35. Garcia-Fernandez E, De Diego JI, Collantes-Bellido E, Mendiola M, Prim MP, Perez-Fernandez E, Miguel-Martin M, Nistal M, Hardisson D.** Aurora B kinase

expression in laryngeal squamous cell carcinoma and its prognostic implications.

*Histopathology*. 2011;58: 368-376.

**36. Morin PJ, Sparks AB, Korinek V, Barker N, Clevers H, Vogelstein B, Kinzler KW.**

Activation of beta-catenin-Tcf signaling in colon cancer by mutations in beta-catenin or APC.

*Science*. 1997;275: 1787-1790.
